# Supplementary material for: Metal–ligand synergy driven functionalisation of alkylene linked bis(aldimine) on a diruthenium(ii) platform. Cyclisation versus oxygenation
Source: Royal Society of Chemistry journal article supplement (doi:10.1039/d3dt03730d), 2023-12-21
Supplement: d3dt03730d1.pdf [file d3dt03730d1.pdf]

**Metal-ligand synergy driven functionalisation of alkylene linked bis(aldimine) on diruthenium(II) platform. Cyclisation *versus* oxygenation**

Mitrani Biswas, Sanchaita Dey, Suman Dhara, Sanjib Panda, and Goutam Kumar Lahiri\*

*Department of Chemistry, Indian Institute of Technology Bombay, Powai, Mumbai-400076, India*

*E-mail: [lahiri@chem.iitb.ac.in](mailto:lahiri@chem.iitb.ac.in)*

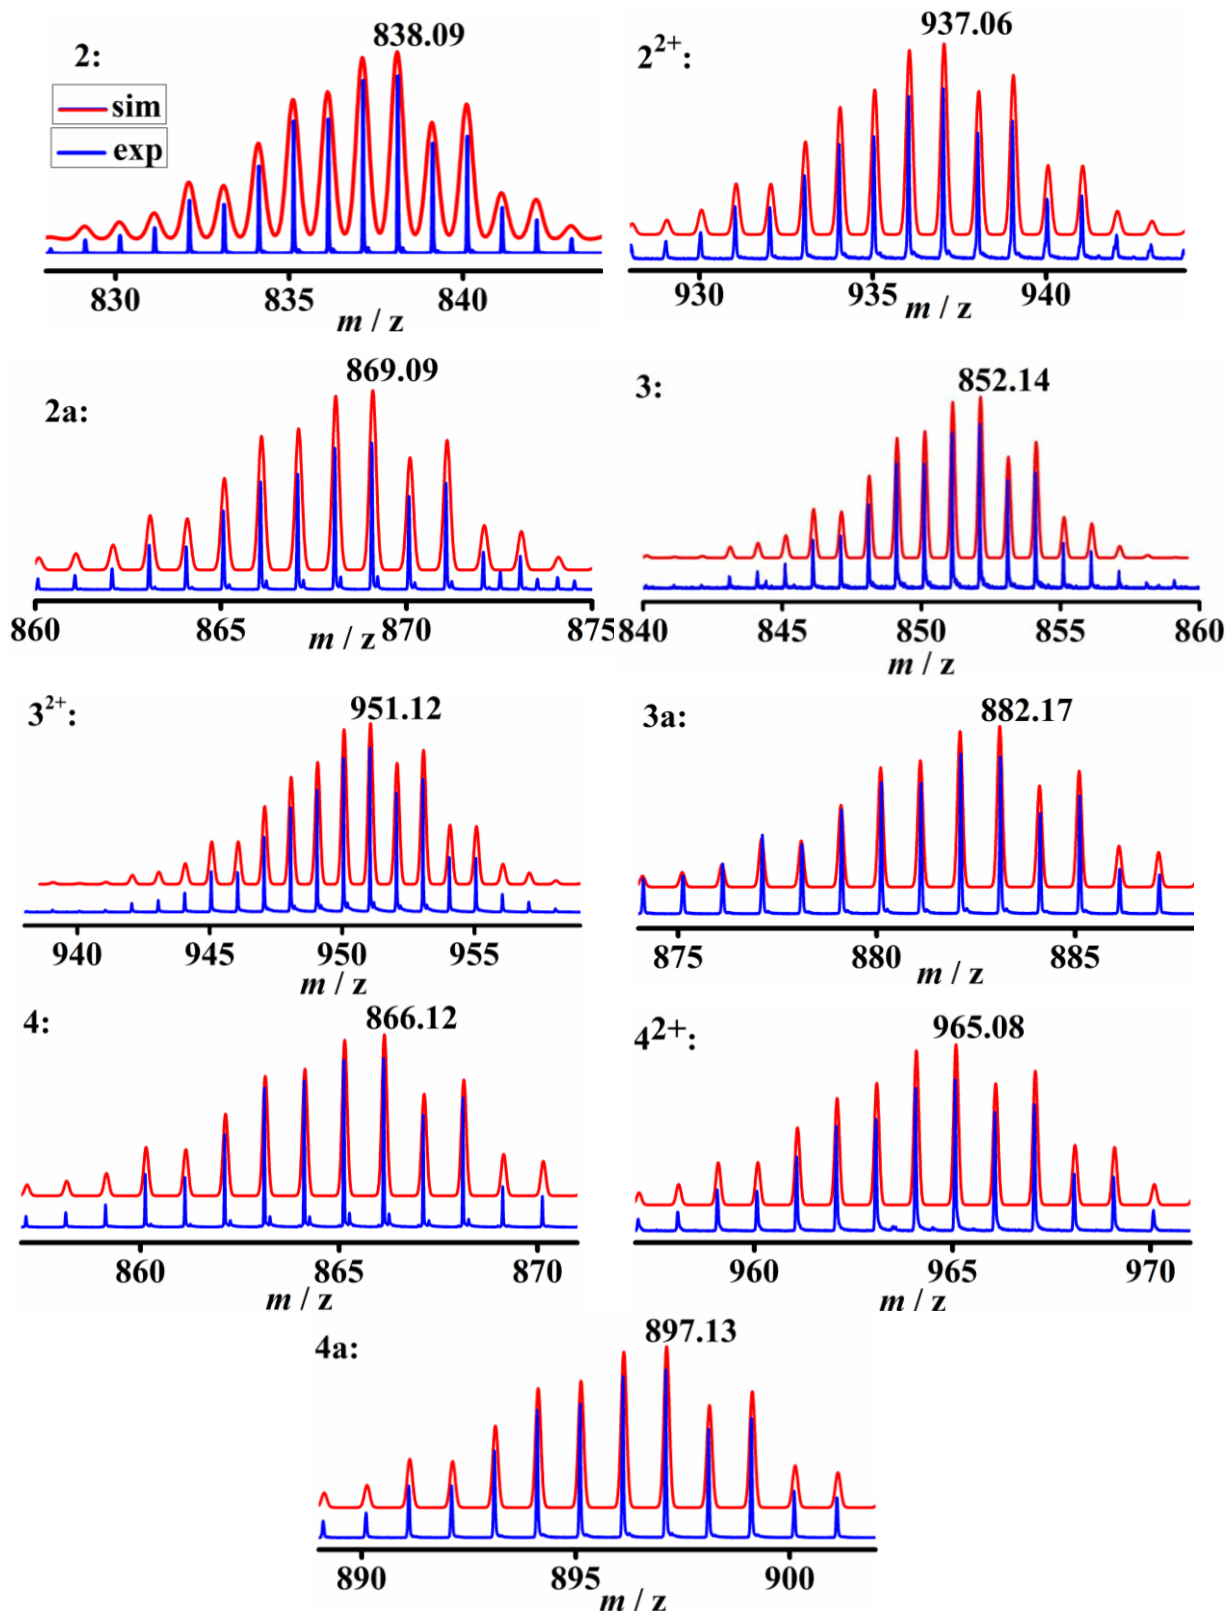

**Fig. S1a** Experimental and simulated ESI(+) mass spectrometry of **2**,  $\{[2](\text{ClO}_4)_2\text{-ClO}_4\}^+$ ,  $\{2\text{a}+\text{H}\}^+$ ,  $\{3+\text{H}\}^+$ ,  $\{[3](\text{ClO}_4)_2\text{-ClO}_4\}^+$ , **3a**, **4**,  $\{[4](\text{ClO}_4)_2\text{-ClO}_4\}^+$  and  $\{4\text{a}+2\text{H}\}^+$  in  $\text{CH}_3\text{CN}$ .

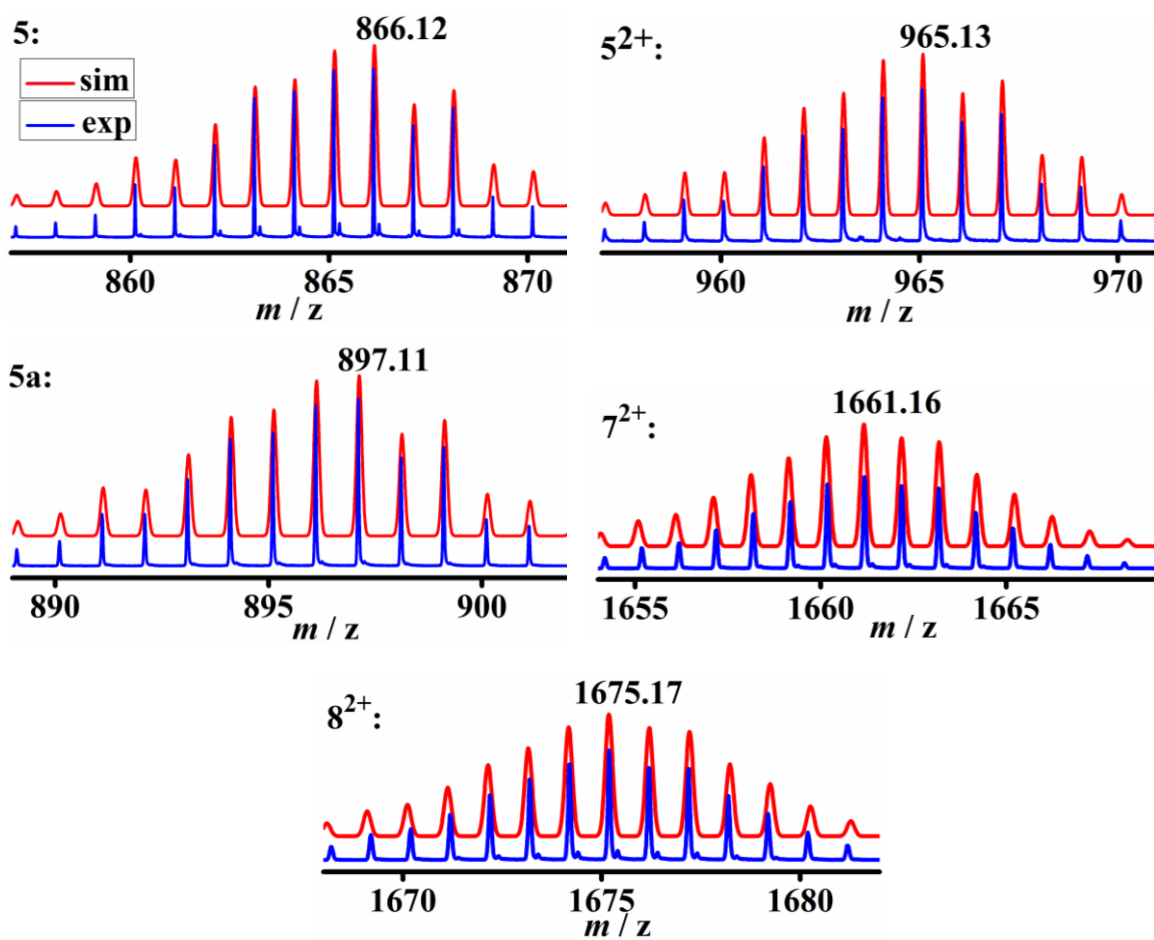

**Fig. S1b** Experimental and simulated ESI(+) mass spectrometry of **5**,  $\{[5](\text{ClO}_4)_2\text{-ClO}_4\}^+$ ,  $\{5\text{a}+2\text{H}\}^+$ ,  $\{[7](\text{ClO}_4)_2\text{-ClO}_4\}^+$  and  $\{[8](\text{ClO}_4)_2\text{-ClO}_4\}^+$  in  $\text{CH}_3\text{CN}$ .

$2^{2+}$ :

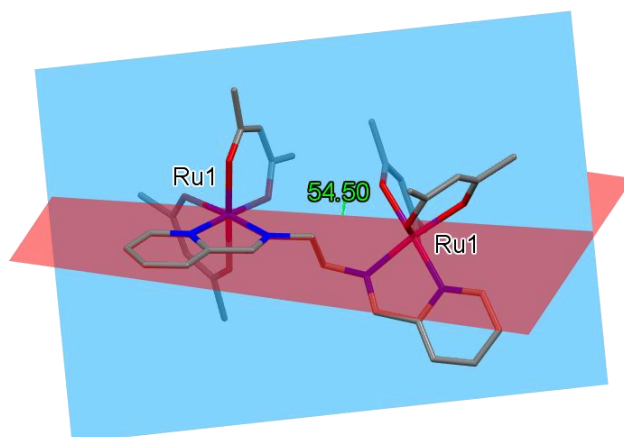

$4^{2+}$ :

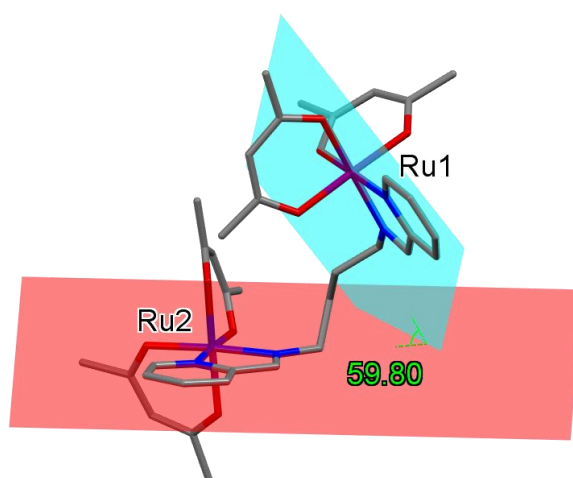

$5^{2+}$ :

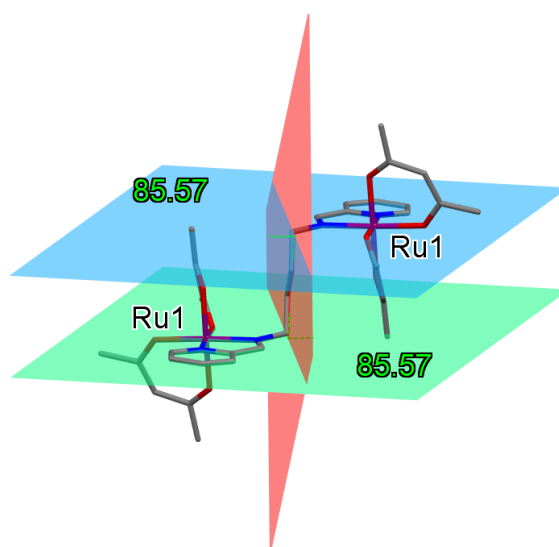

**Fig. S2a** Torsional angle (deg) between the planes.

**2a:**

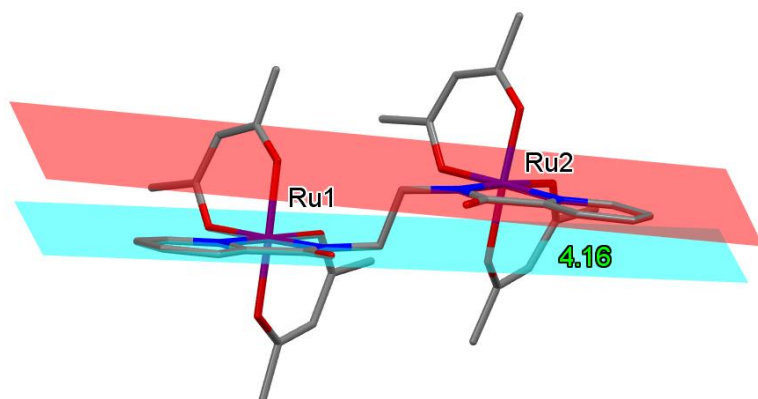

**3a:**

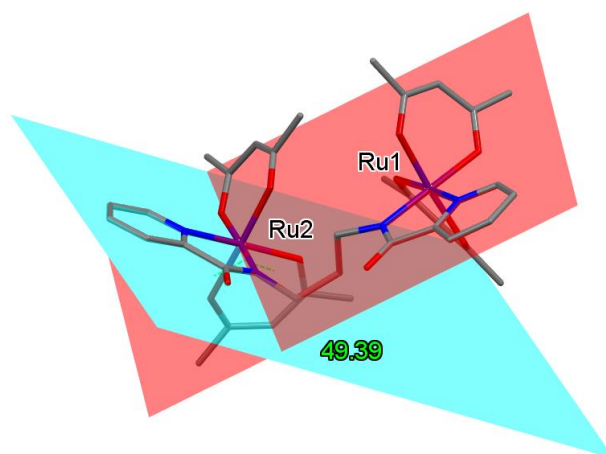

**Fig. S2b** Torsional angle (deg) between the planes.

$7^{2+}$ :

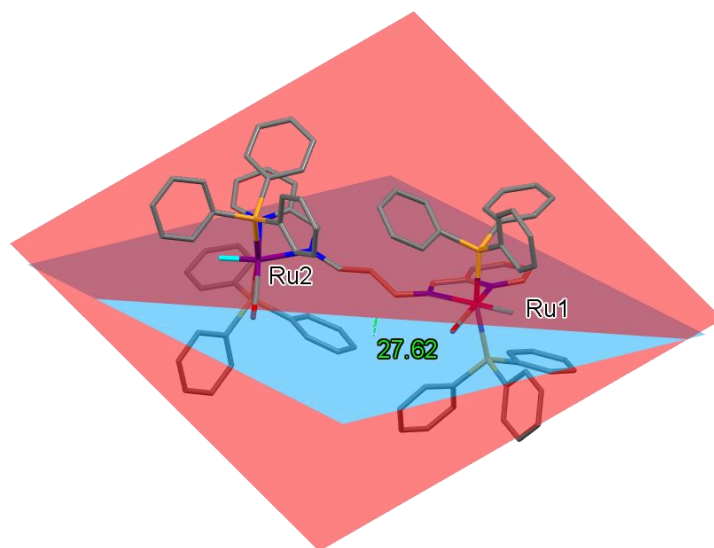

$8^{2+}$ :

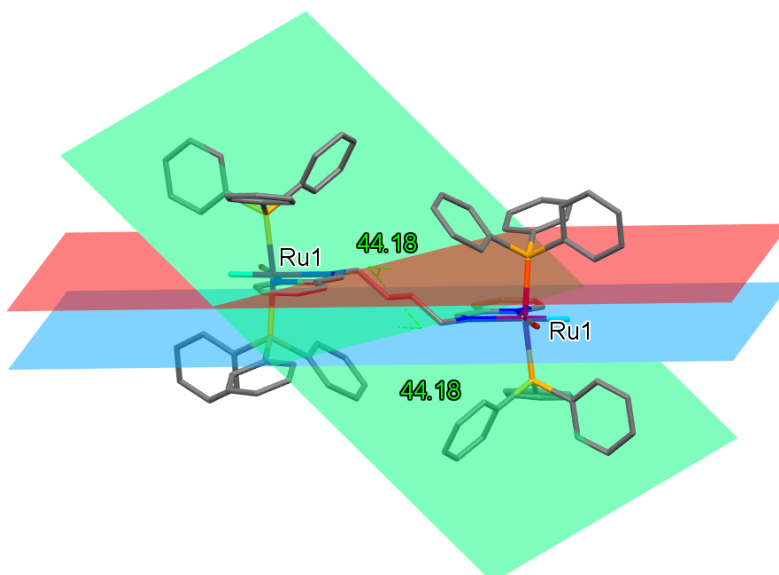

**Fig. S3** Torsional angle (deg) between the planes.

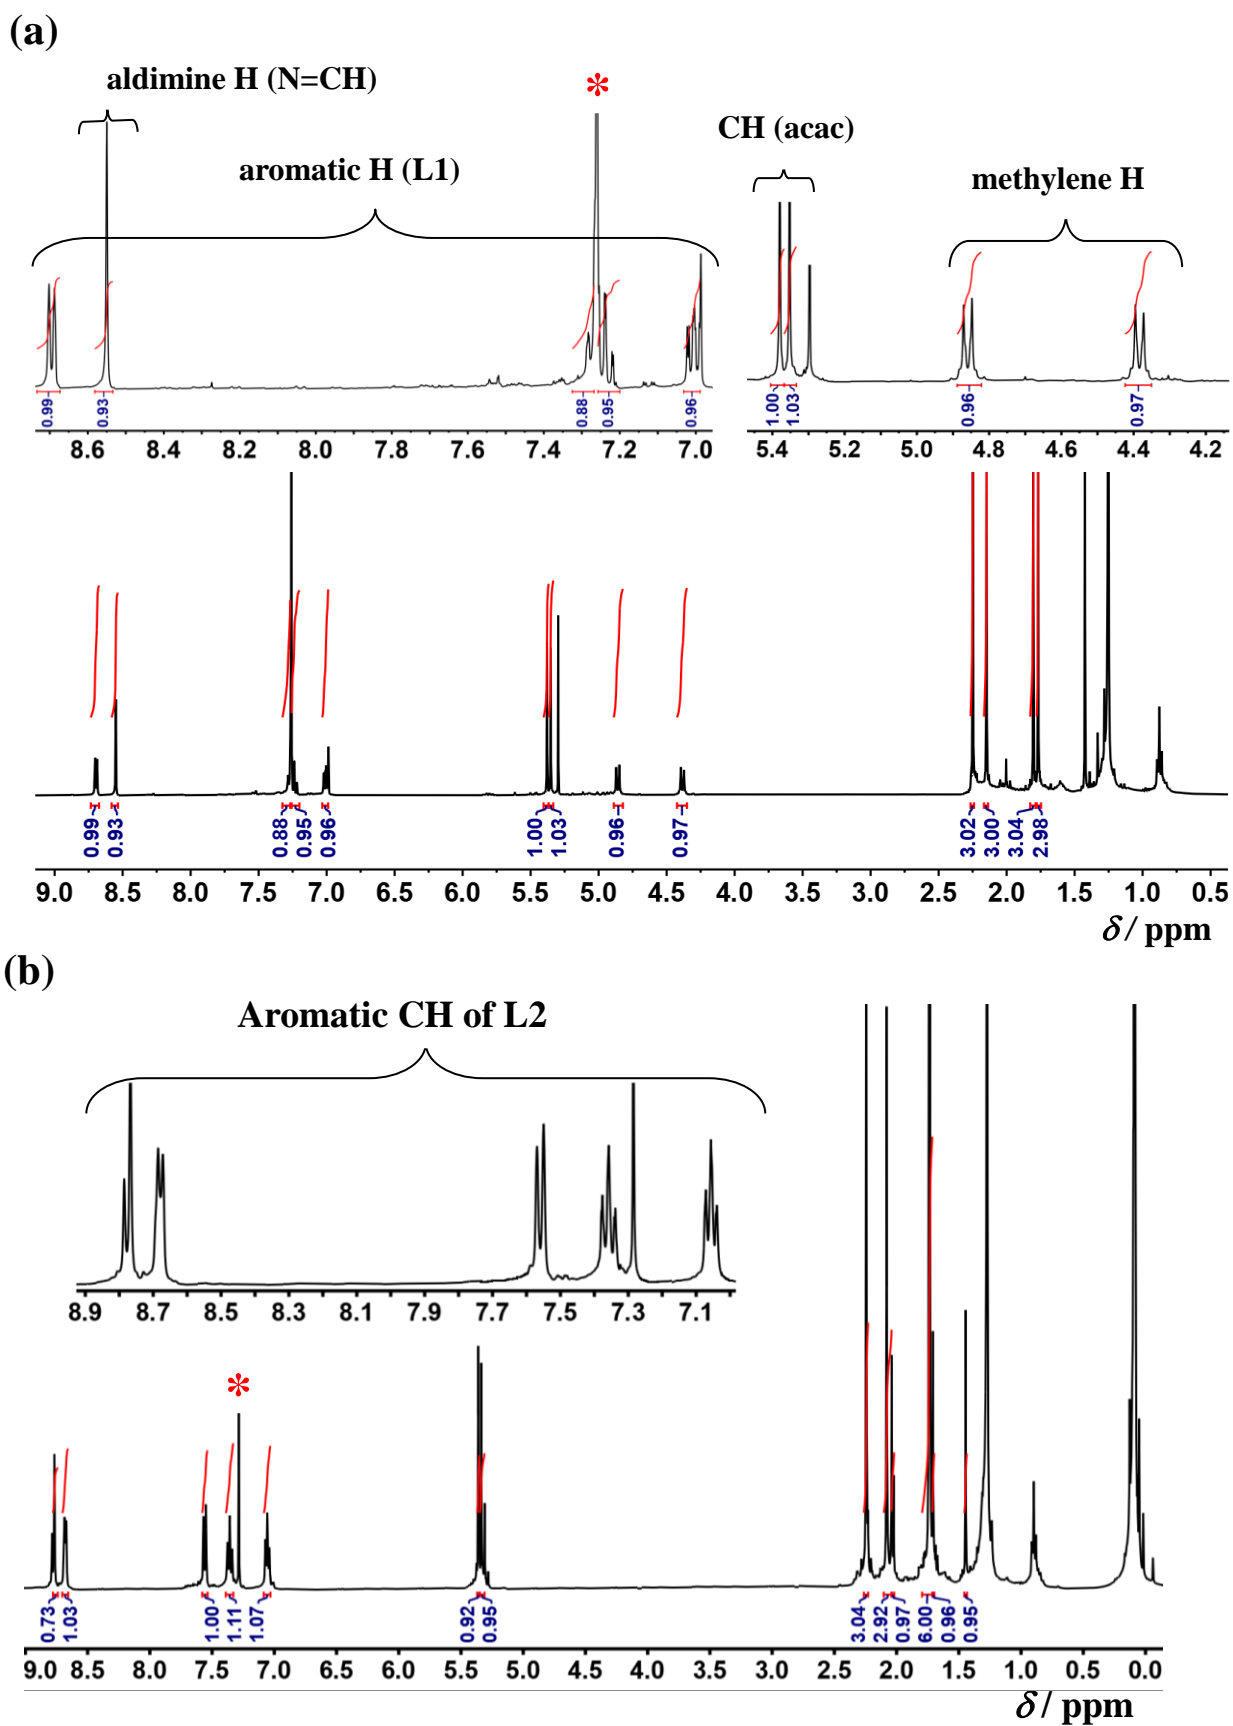

**Fig. S4a**  $^1\text{H}$  NMR of (a) **2** and (b) **3** in  $\text{CDCl}_3$  with TMS ( $\delta = 0$  ppm) as internal standard.

Inset shows the segmented spectrum. (\*) stands for solvent impurity.

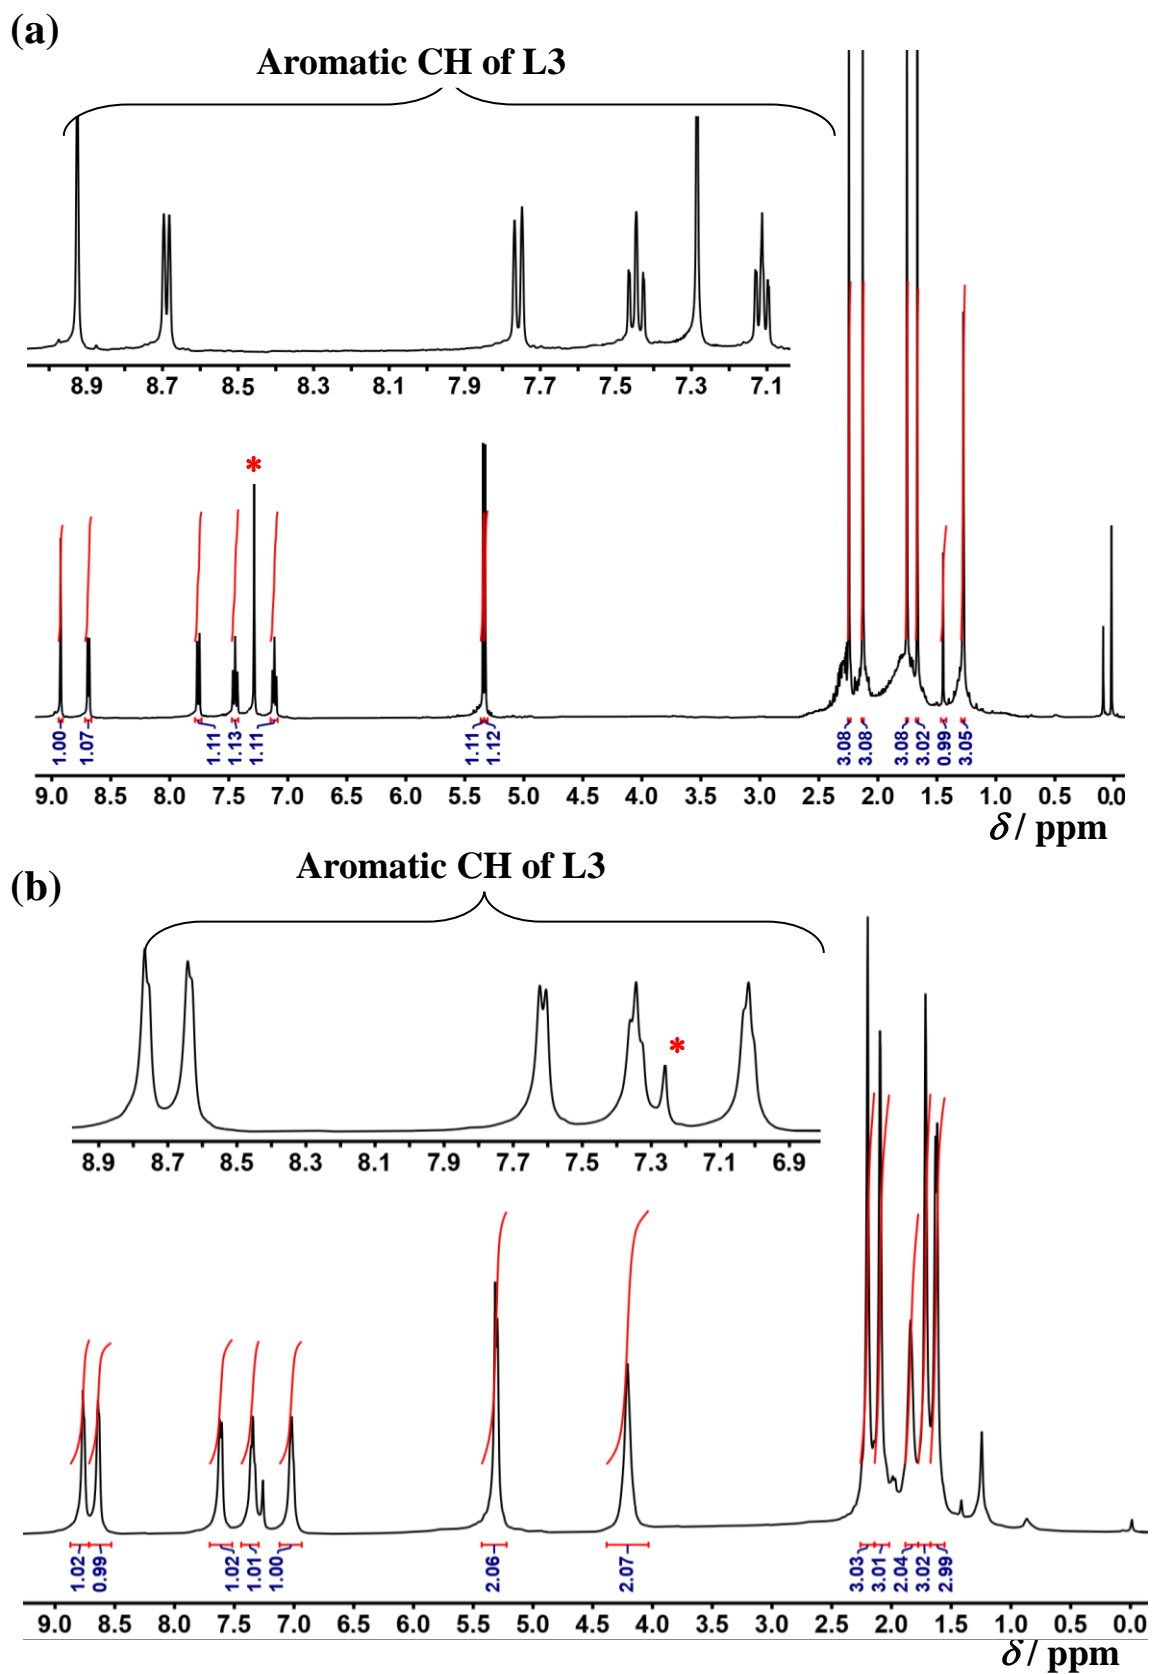

**Fig. S4b**  $^1\text{H}$  NMR of (a) **4** and (b) **5** in  $\text{CDCl}_3$  with TMS ( $\delta = 0$  ppm) as internal standard.

Inset shows the segmented spectrum. (\*) stands for solvent impurity.



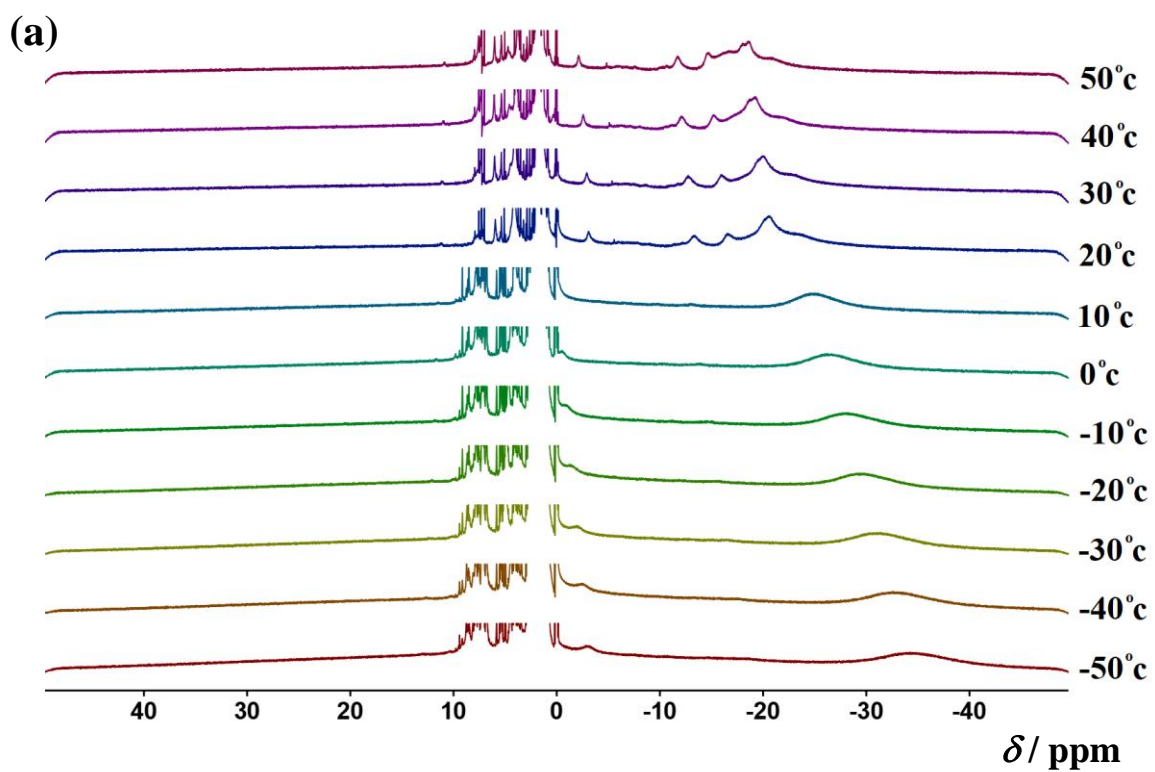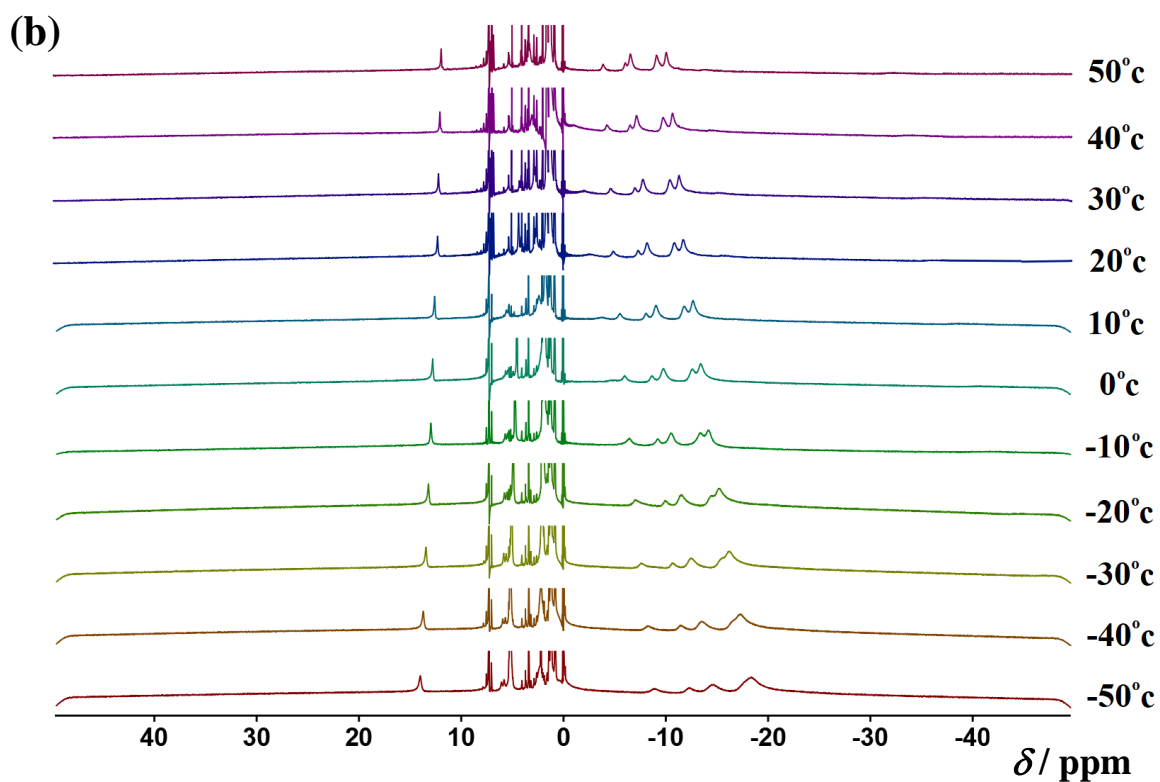

**Fig. S5a** Variable temperature  $^1\text{H}$  NMR of (a)  $[\mathbf{2}](\text{ClO}_4)_2$  and (b)  $\mathbf{2a}$  in  $\text{CDCl}_3$  with TMS ( $\delta = 0$  ppm) as internal standard.

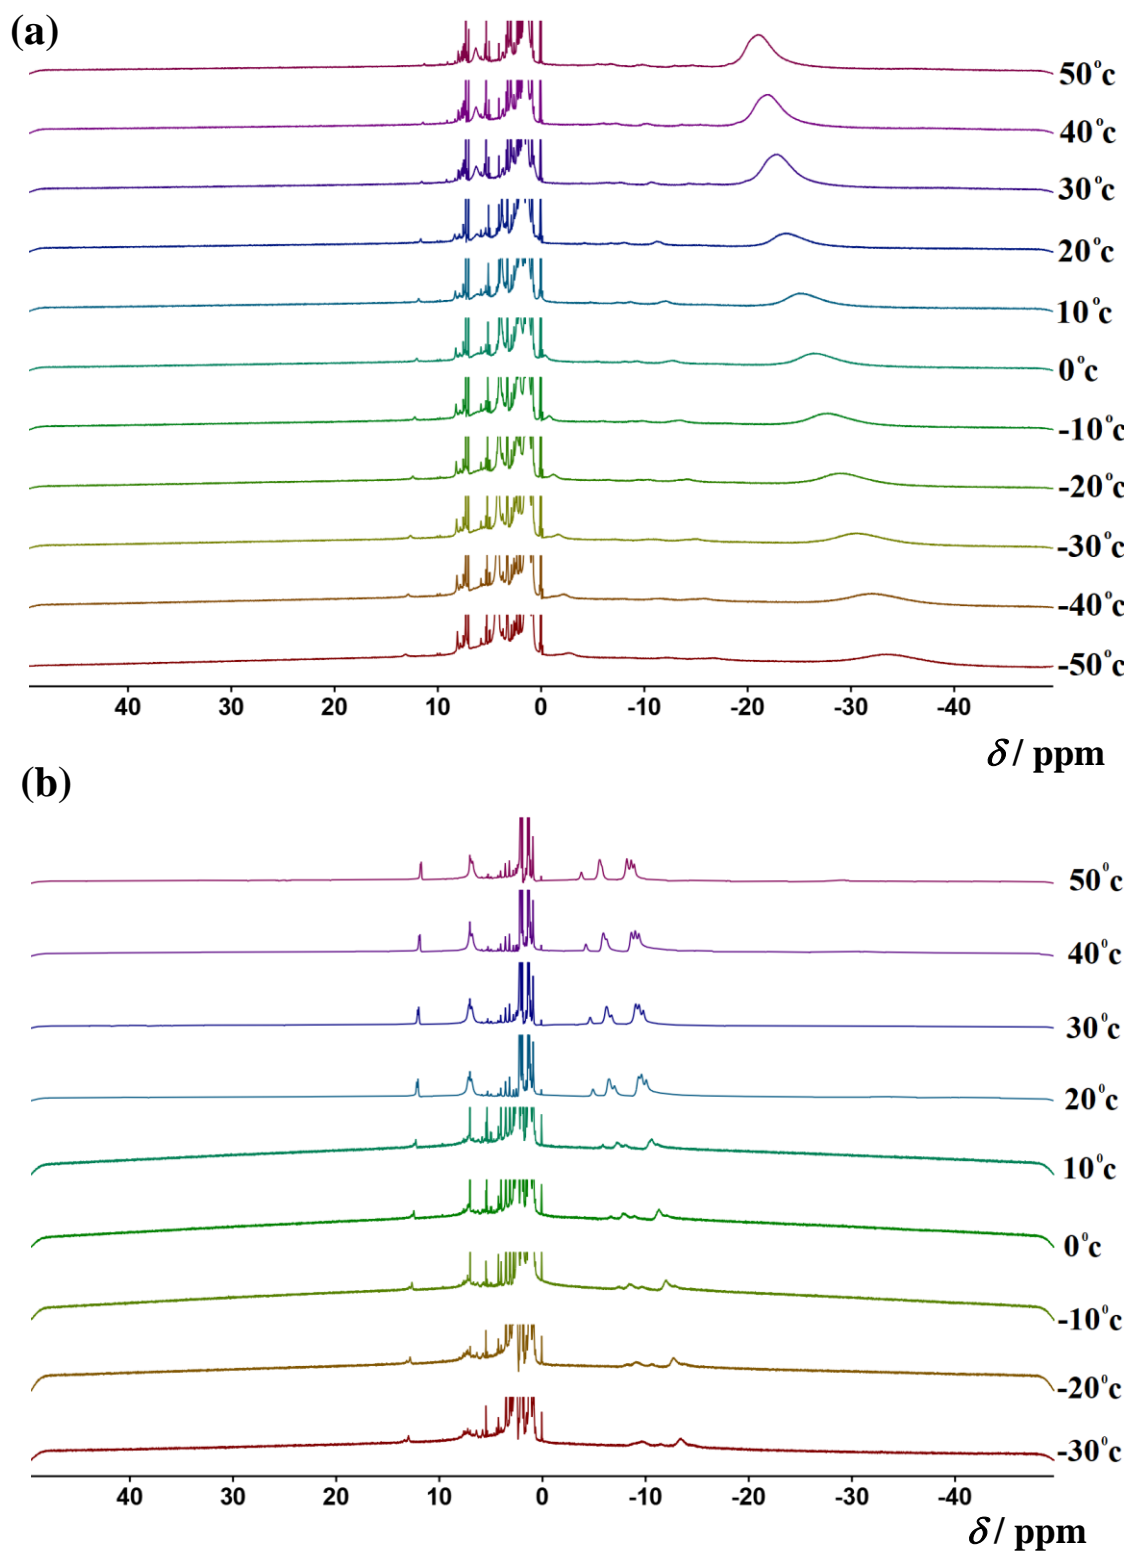

**Fig. S5b** Variable temperature  $^1\text{H}$  NMR of (a)  $[\mathbf{3}](\text{ClO}_4)_2$  and (b)  $\mathbf{3a}$  in  $\text{CDCl}_3$  with TMS ( $\delta = 0$  ppm) as internal standard.

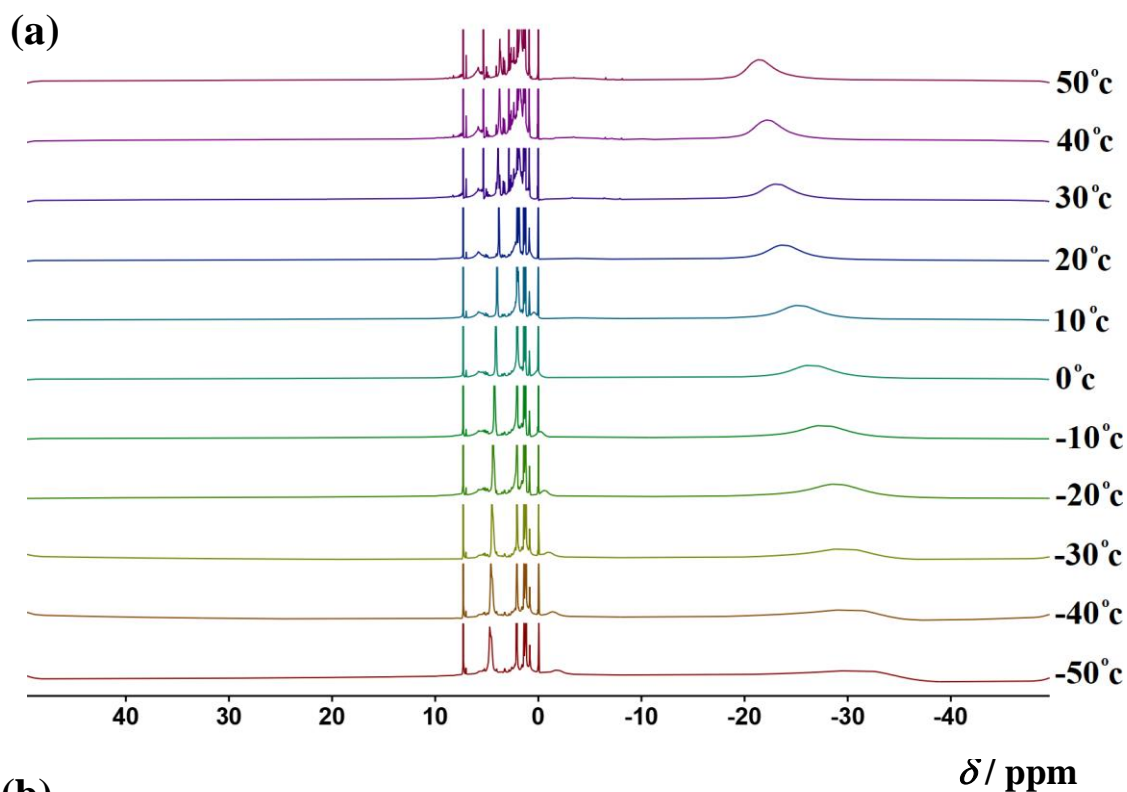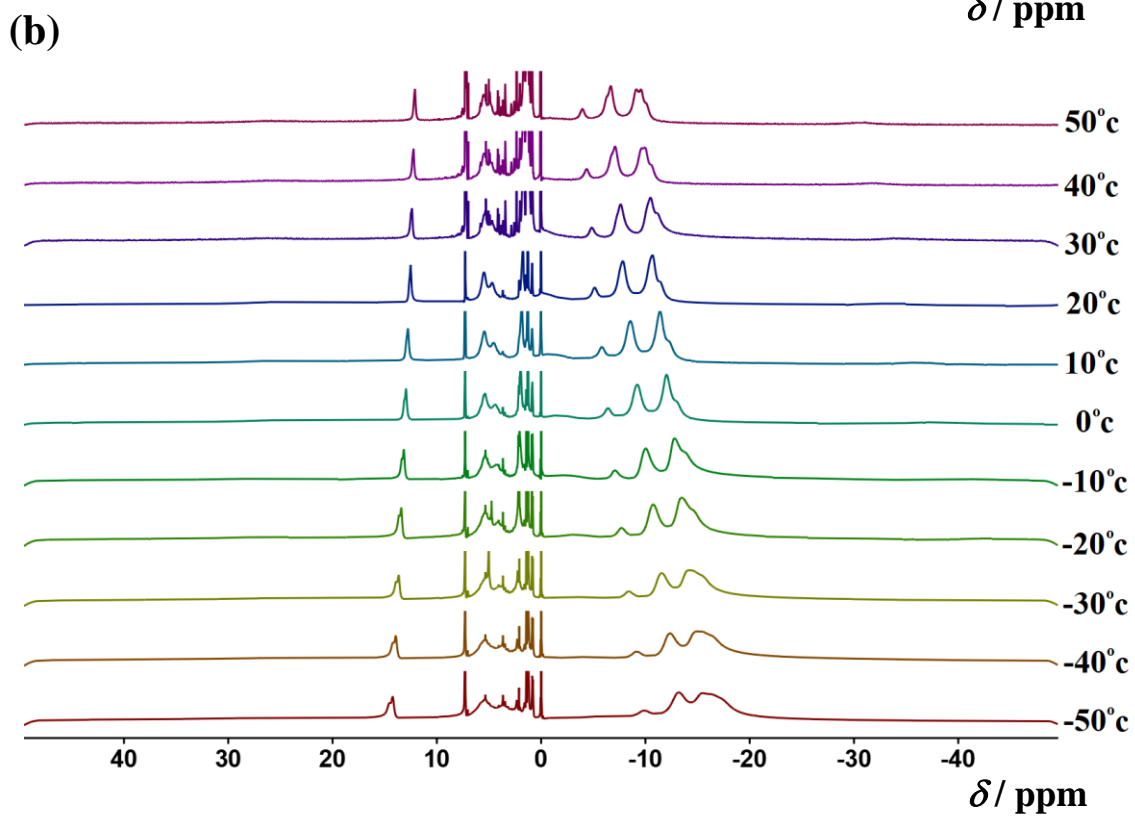

**Fig. S5c** Variable temperature  $^1\text{H}$  NMR of (a)  $[\mathbf{4}](\text{ClO}_4)_2$  and (b)  $\mathbf{4a}$  in  $\text{CDCl}_3$  with TMS ( $\delta = 0$  ppm) as internal standard.

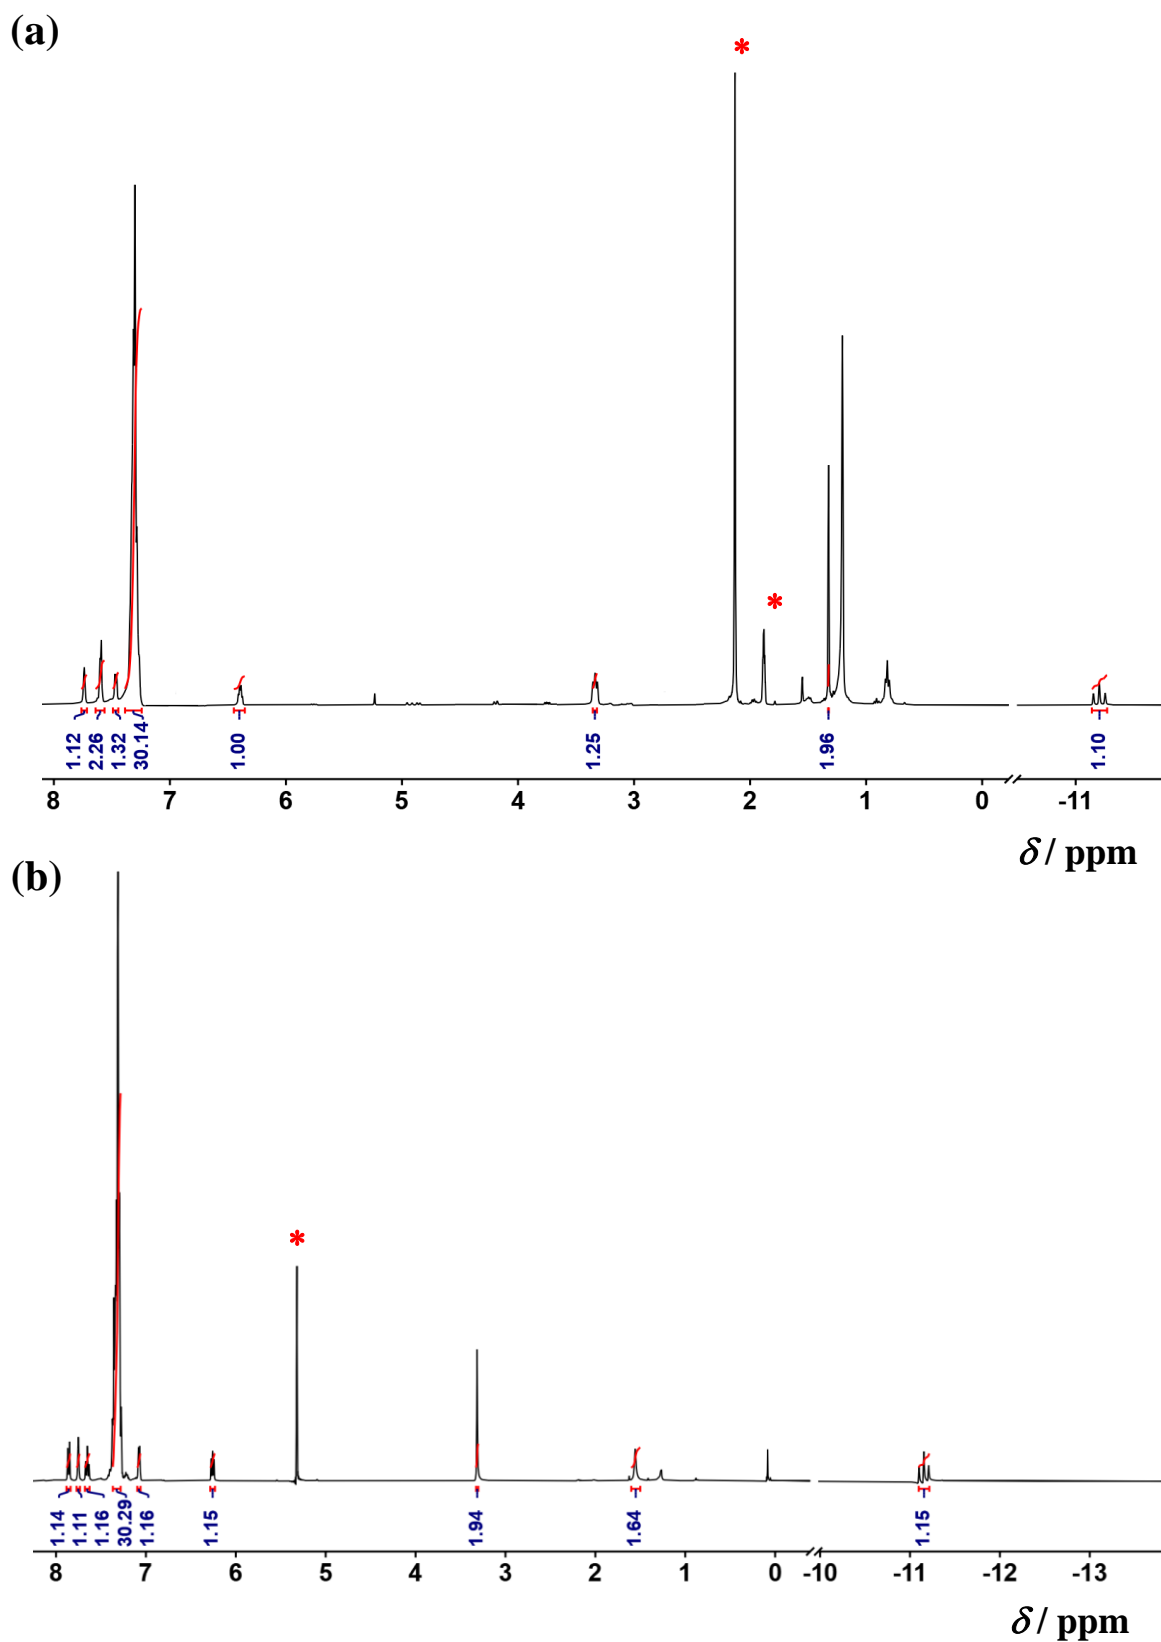

**Fig. S6a**  $^1\text{H}$  NMR of (a) **[7]**(ClO<sub>4</sub>)<sub>2</sub> and (b) **[8]**(ClO<sub>4</sub>)<sub>2</sub> in CD<sub>3</sub>CN and CD<sub>2</sub>Cl<sub>2</sub>, respectively, with TMS ( $\delta = 0$  ppm) as internal standard. (\*) stands for solvent impurity.

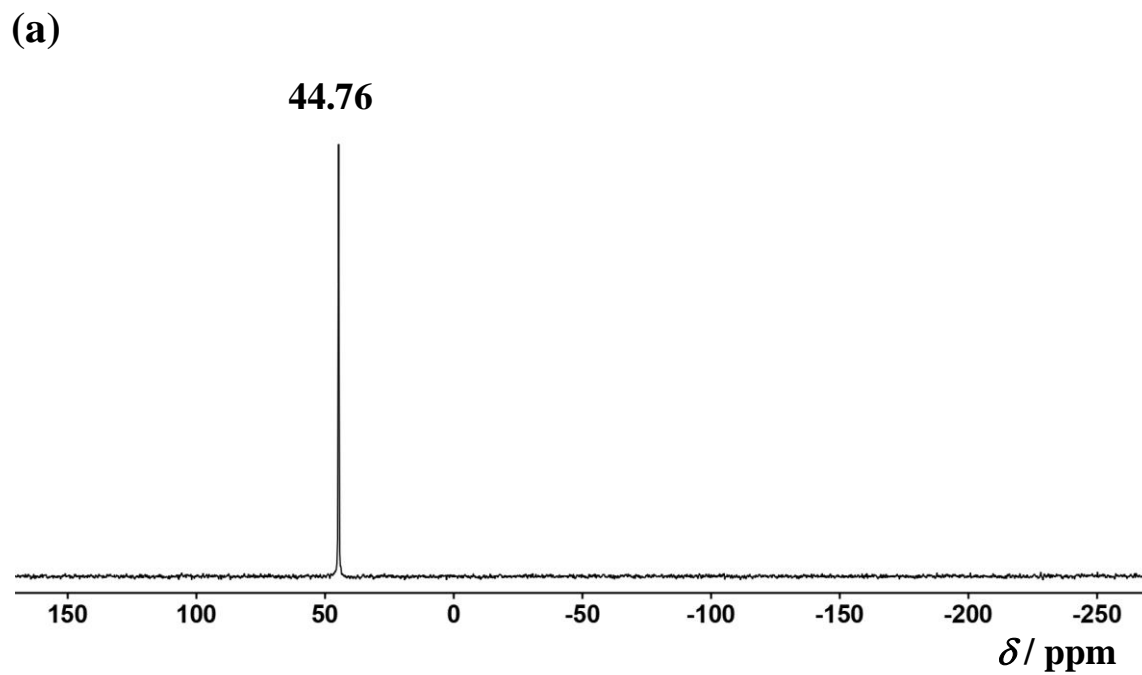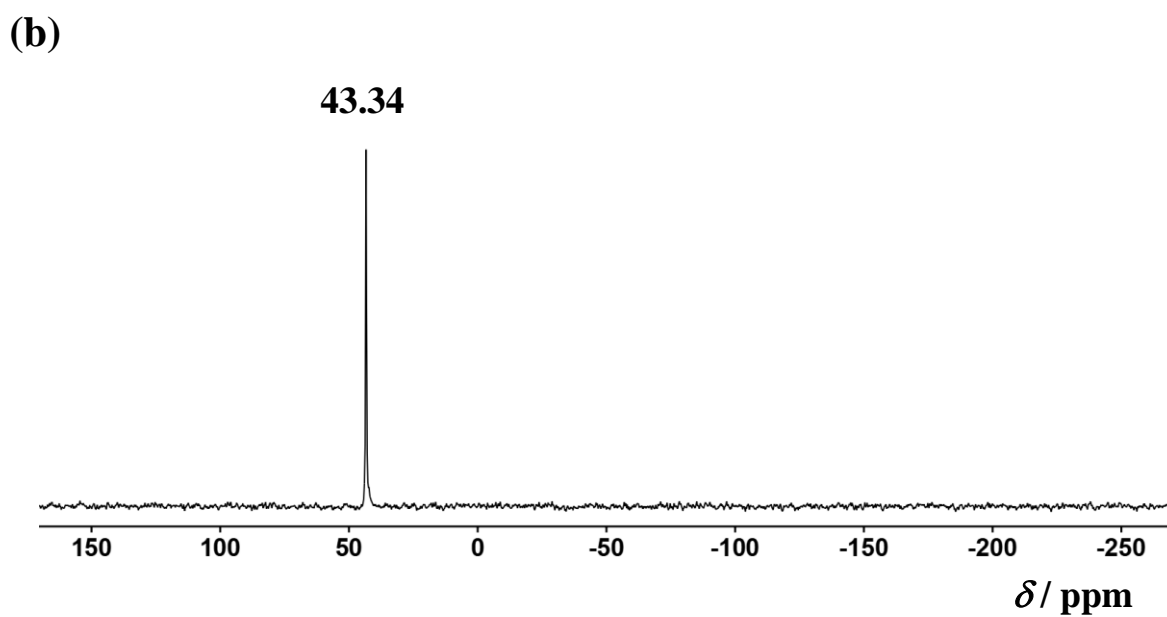

**Fig. S6b**  $^{31}\text{P}$  NMR of (a)  $[\mathbf{7}](\text{ClO}_4)_2$  and (b)  $[\mathbf{8}](\text{ClO}_4)_2$  in  $\text{CD}_3\text{CN}$  and  $\text{CD}_2\text{Cl}_2$ , respectively, with TMS ( $\delta = 0$  ppm) as internal standard.

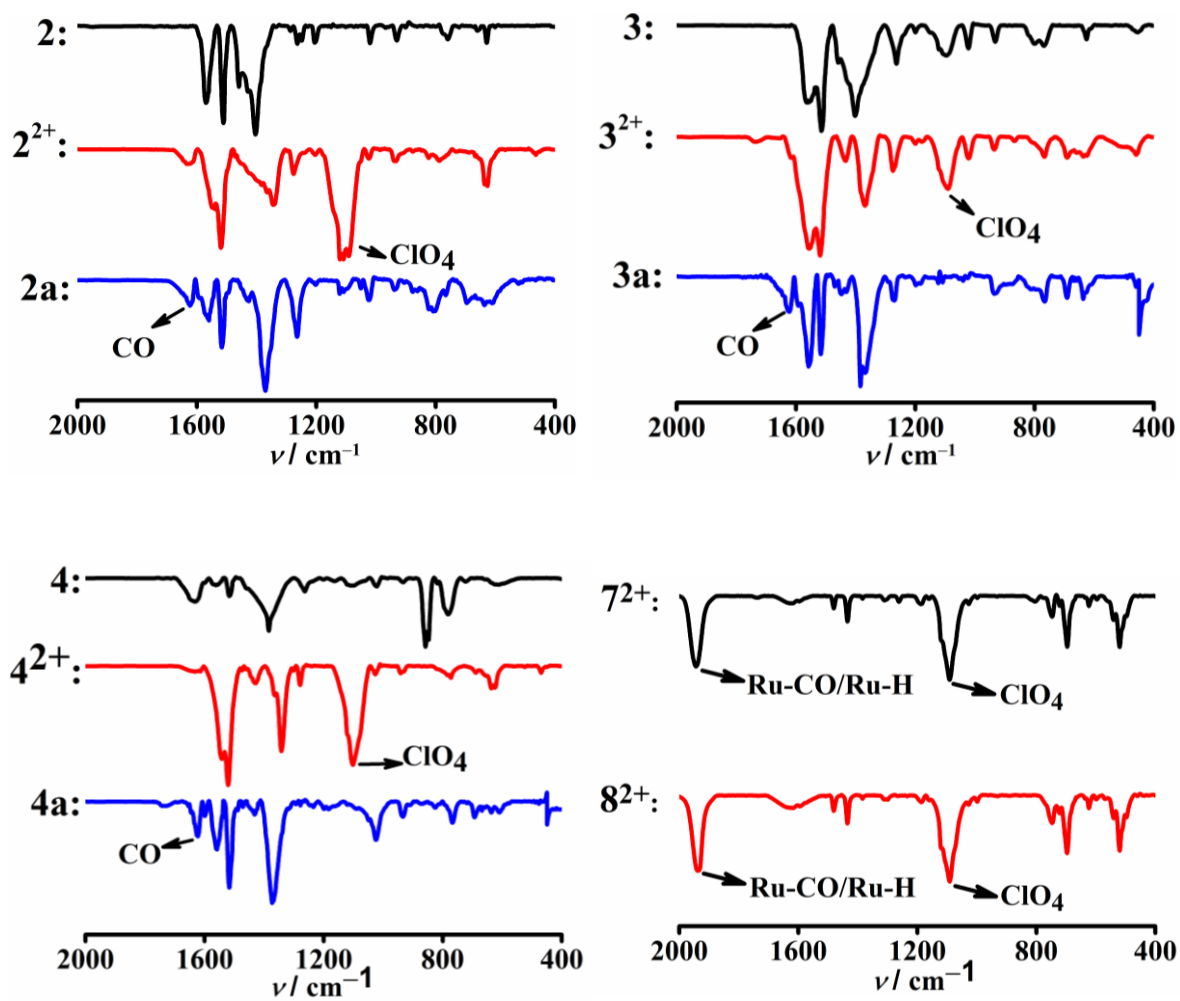

Fig. S7 FT-IR spectra as KBr pellets.

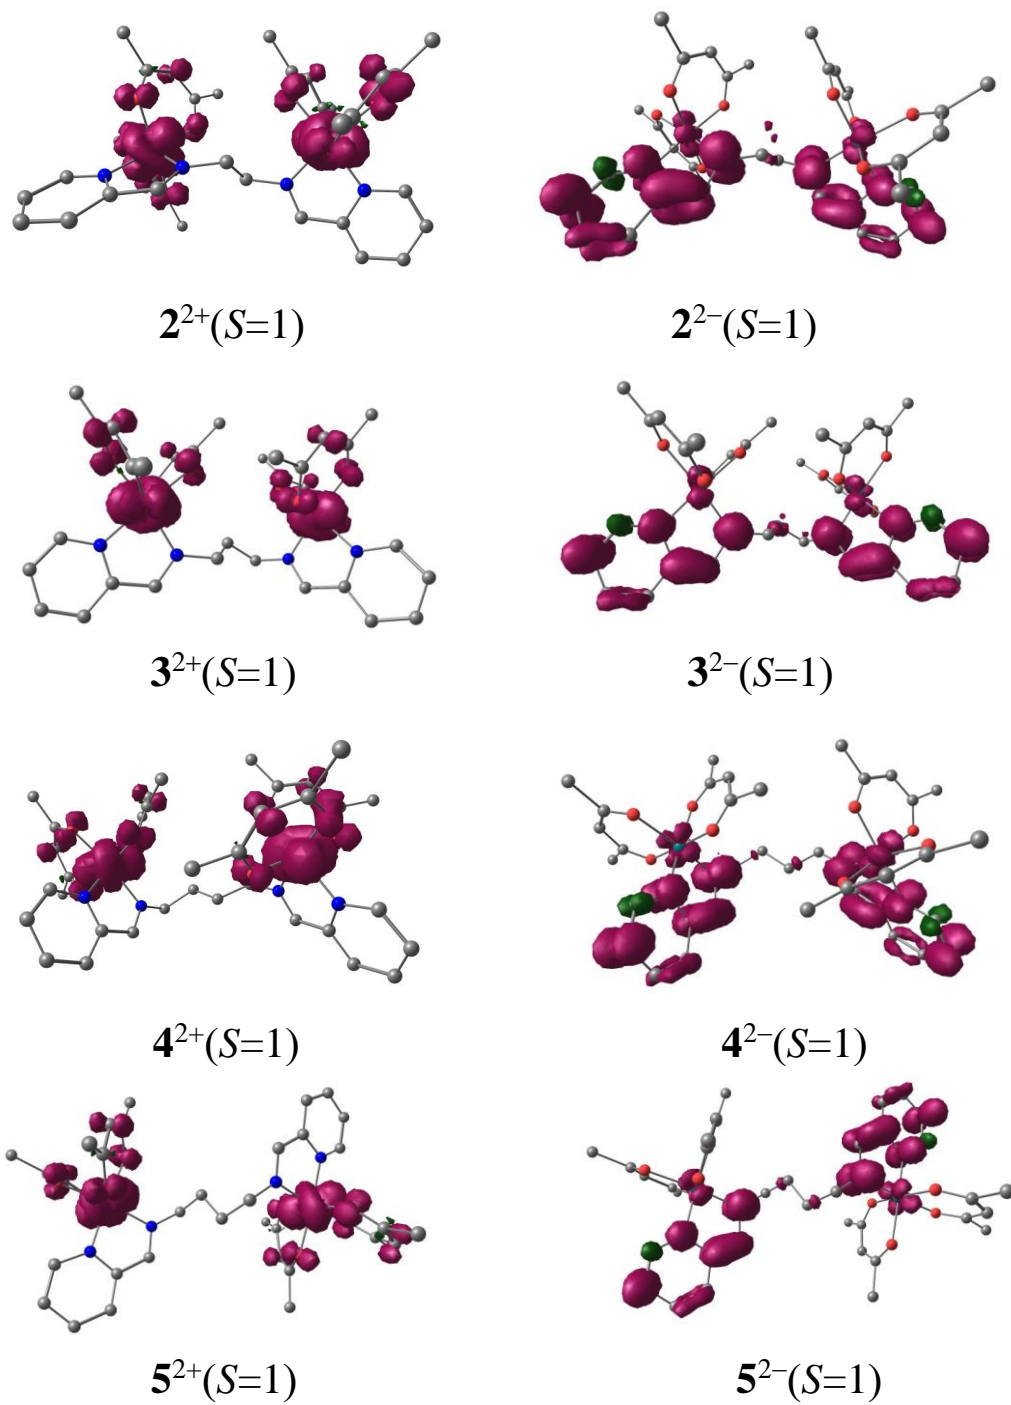

**Fig. S8a** DFT calculated Mulliken spin density plots for  $2^n$ ,  $3^n$ ,  $4^n$  and  $5^n$  ( $n = +2, -2$ ).

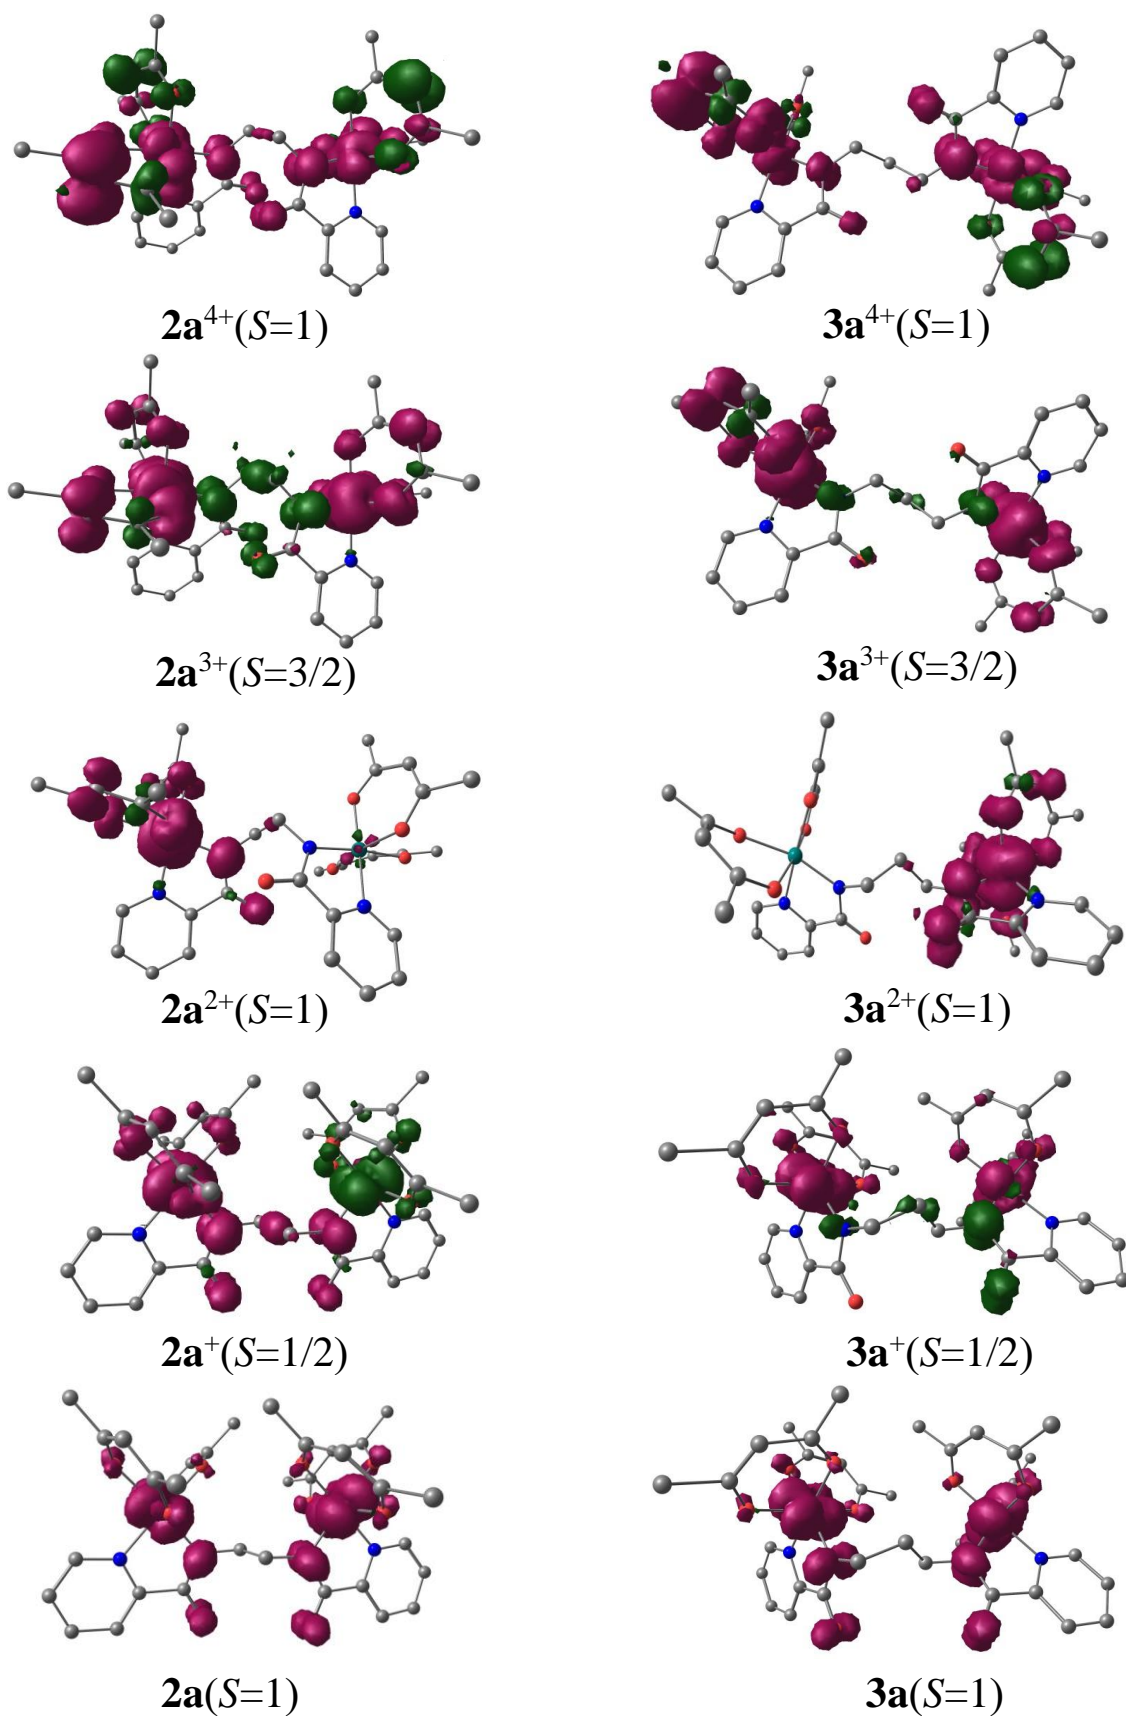

**Fig. S8b** DFT calculated Mulliken spin density plots for  $2a^n$  and  $3a^n$  ( $n = +4, +3, +2, +1, 0$ ).



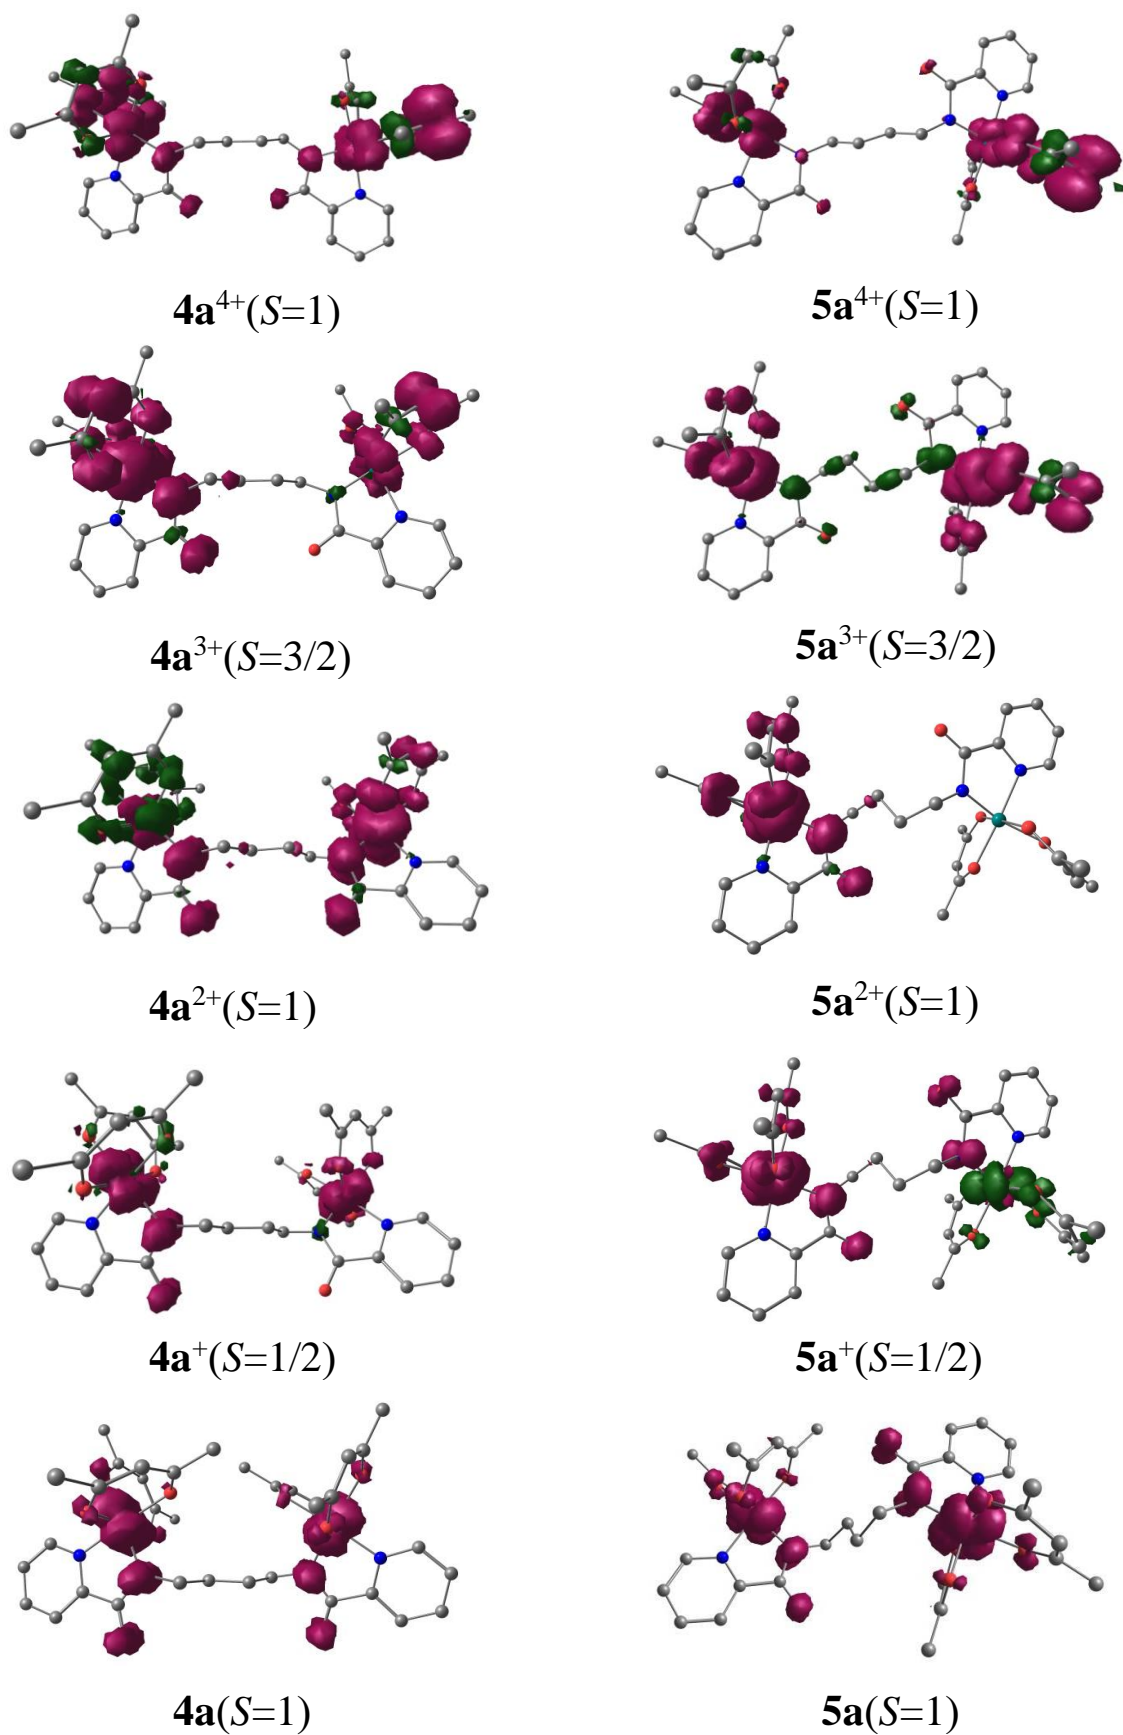

**Fig. S8c** DFT calculated Mulliken spin density plots for  $4a^n$  and  $5a^n$  ( $n = +4, +3, +2, +1, 0$ ).

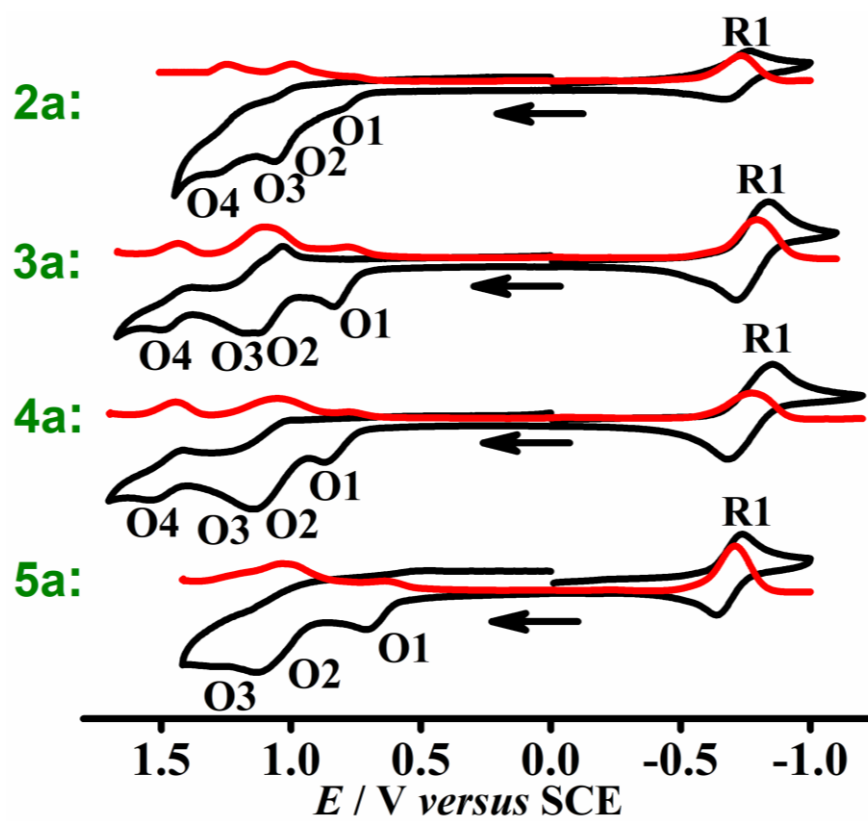

**Fig. S9** Cyclic (red) and differential pulse (black) voltammograms of **2a**, **3a**, **4a** and **5a** in  $\text{CH}_3\text{CN}$ .

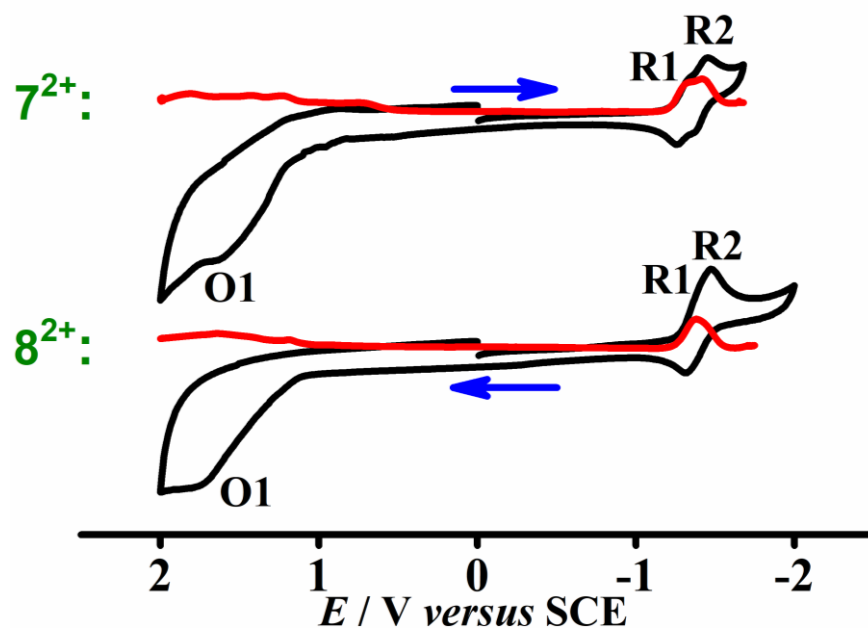

**Fig. S10** Cyclic (red) and differential pulse (black) voltammograms of **[7]**(ClO<sub>4</sub>)<sub>2</sub> and **[8]**(ClO<sub>4</sub>)<sub>2</sub> in CH<sub>3</sub>CN.

**Scheme S1** Electronic forms of  $2a^n-5a^n$  ( $n= +4, +3, +2, +1, 0, -2$ )

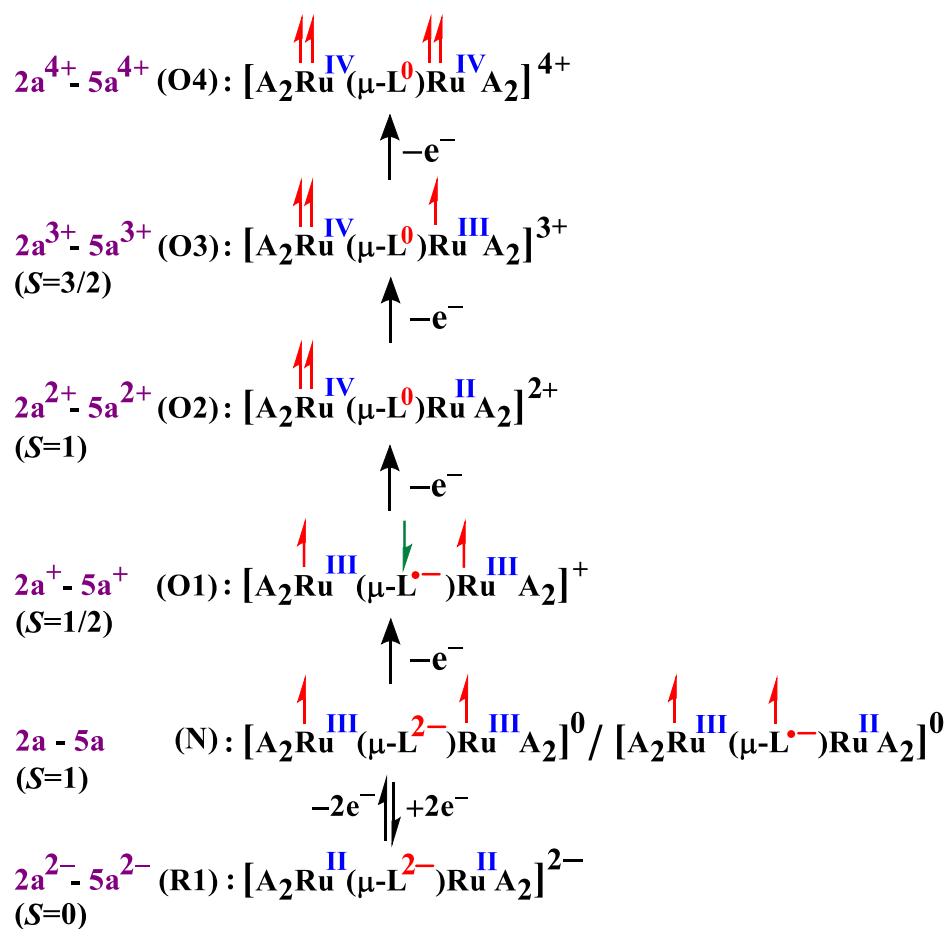

**Table S1a** Selected crystallographic parameters

| Complex                                      | [2](ClO <sub>4</sub> ) <sub>2</sub> •2CH <sub>2</sub> Cl <sub>2</sub>                          | <b>2a</b>                                                                      | <b>3a</b>                                                                      | [4](ClO <sub>4</sub> ) <sub>2</sub> •3CH <sub>2</sub> Cl <sub>2</sub>                          | [5](ClO <sub>4</sub> ) <sub>2</sub> •4CHCl <sub>3</sub>                                         |
|----------------------------------------------|------------------------------------------------------------------------------------------------|--------------------------------------------------------------------------------|--------------------------------------------------------------------------------|------------------------------------------------------------------------------------------------|-------------------------------------------------------------------------------------------------|
| empirical formula                            | C <sub>36</sub> H <sub>46</sub> N <sub>4</sub> O <sub>16</sub> Cl <sub>6</sub> Ru <sub>2</sub> | C <sub>34</sub> H <sub>40</sub> N <sub>4</sub> O <sub>10</sub> Ru <sub>2</sub> | C <sub>35</sub> H <sub>42</sub> N <sub>4</sub> O <sub>10</sub> Ru <sub>2</sub> | C <sub>39</sub> H <sub>52</sub> N <sub>4</sub> O <sub>16</sub> Cl <sub>8</sub> Ru <sub>2</sub> | C <sub>40</sub> H <sub>50</sub> N <sub>4</sub> O <sub>16</sub> Cl <sub>14</sub> Ru <sub>2</sub> |
| formula weight                               | 1205.61                                                                                        | 866.84                                                                         | 880.86                                                                         | 1318.58                                                                                        | 1541.28                                                                                         |
| crystal system                               | Monoclinic                                                                                     | Triclinic                                                                      | Triclinic                                                                      | Monoclinic                                                                                     | Monoclinic                                                                                      |
| space group                                  | <i>C2/c</i>                                                                                    | <i>P-1</i>                                                                     | <i>P-1</i>                                                                     | <i>P2<sub>1</sub>/c</i>                                                                        | <i>C2/c</i>                                                                                     |
| a (Å)                                        | 17.9403(5)                                                                                     | 12.5742(10)                                                                    | 10.986(2)                                                                      | 12.6627(3)                                                                                     | 22.5574(6)                                                                                      |
| b (Å)                                        | 12.6420(2)                                                                                     | 12.8511(11)                                                                    | 13.108(3)                                                                      | 36.9819(7)                                                                                     | 13.0011(3)                                                                                      |
| c (Å)                                        | 22.9581(7)                                                                                     | 13.6116(12)                                                                    | 15.434(3)                                                                      | 12.1433(3)                                                                                     | 21.5012(6)                                                                                      |
| α (deg)                                      | 90                                                                                             | 72.100(8)                                                                      | 67.924(3)                                                                      | 90                                                                                             | 90                                                                                              |
| β (deg)                                      | 114.810                                                                                        | 69.913(8)                                                                      | 72.987(4)                                                                      | 103.949(2)                                                                                     | 97.806(3)                                                                                       |
| γ (deg)                                      | 90                                                                                             | 81.135(7)                                                                      | 77.492(4)                                                                      | 90                                                                                             | 90                                                                                              |
| V (Å <sup>3</sup> )                          | 4726.3(3)                                                                                      | 1962.8(3)                                                                      | 1955.3(7)                                                                      | 5518.9(2)                                                                                      | 6247.2(3)                                                                                       |
| Z                                            | 4                                                                                              | 2                                                                              | 2                                                                              | 4                                                                                              | 4                                                                                               |
| μ (mm <sup>-1</sup> )                        | 1.049                                                                                          | 0.825                                                                          | 0.830                                                                          | 0.999                                                                                          | 1.144                                                                                           |
| T (K)                                        | 150.00(10)                                                                                     | 150.00(10)                                                                     | 105.0                                                                          | 150.00(10)                                                                                     | 150.00(10)                                                                                      |
| ρ <sub>calc</sub> (g cm <sup>-3</sup> )      | 1.694                                                                                          | 1.467                                                                          | 1.496                                                                          | 1.587                                                                                          | 1.639                                                                                           |
| F(000)                                       | 2432.0                                                                                         | 880.0                                                                          | 896.0                                                                          | 2664.0                                                                                         | 3088.0                                                                                          |
| θ range(deg)                                 | 1.954 to 33.786                                                                                | 1.656 to 24.999                                                                | 1.953 to 25.178                                                                | 1.657 to 24.999                                                                                | 1.812 to 24.999                                                                                 |
| data/restraints/parameter                    | 8096/ 0/ 293                                                                                   | 6910/ 0/ 459                                                                   | 7005/ 0/ 468                                                                   | 9712/ 7/ 630                                                                                   | 5509/ 12/ 347                                                                                   |
| R1, wR2 [I>2σ(I)]                            | 0.0413, 0.0841                                                                                 | 0.0677, 0.1683                                                                 | 0.0816, 0.1530                                                                 | 0.0577, 0.1558                                                                                 | 0.0697, 0.1819                                                                                  |
| R1, wR2(all data)                            | 0.0655, 0.0933                                                                                 | 0.0906, 0.1878                                                                 | 0.1230, 0.1693                                                                 | 0.0752, 0.1693                                                                                 | 0.0836, 0.1912                                                                                  |
| GOF                                          | 1.039                                                                                          | 1.057                                                                          | 1.090                                                                          | 1.031                                                                                          | 1.092                                                                                           |
| largest diff. peak/hole [e Å <sup>-3</sup> ] | 1.10/ -0.83                                                                                    | 2.09/ -0.64                                                                    | 1.56/ -1.15                                                                    | 0.96/ -0.57                                                                                    | 1.54/ -0.94                                                                                     |

**Table S1b** Selected crystallographic parameters

|                                              |                                                                                                               |                                                                                                               |
|----------------------------------------------|---------------------------------------------------------------------------------------------------------------|---------------------------------------------------------------------------------------------------------------|
| Complex                                      | [7](ClO <sub>4</sub> ) <sub>2</sub>                                                                           | [8](ClO <sub>4</sub> ) <sub>2</sub> • 2CH <sub>2</sub> Cl <sub>2</sub>                                        |
| empirical formula                            | C <sub>89</sub> H <sub>78</sub> N <sub>4</sub> O <sub>10</sub> Cl <sub>2</sub> P <sub>4</sub> Ru <sub>2</sub> | C <sub>92</sub> H <sub>84</sub> N <sub>4</sub> O <sub>10</sub> Cl <sub>6</sub> P <sub>4</sub> Ru <sub>2</sub> |
| formula weight                               | 1760.47                                                                                                       | 1944.35                                                                                                       |
| crystal system                               | Monoclinic                                                                                                    | Triclinic                                                                                                     |
| space group                                  | <i>P</i> 2 <sub>1</sub> / <i>c</i>                                                                            | <i>P</i> -1                                                                                                   |
| a (Å)                                        | 14.3963(3)                                                                                                    | 13.0632(3)                                                                                                    |
| b (Å)                                        | 21.3283(5)                                                                                                    | 313.3460(2)                                                                                                   |
| c (Å)                                        | 27.8750(6)                                                                                                    | 14.6777(2)                                                                                                    |
| α (deg)                                      | 90                                                                                                            | 64.066(2)                                                                                                     |
| β (deg)                                      | 91.558(2)                                                                                                     | 72.589(2)                                                                                                     |
| γ (deg)                                      | 90                                                                                                            | 82.031(2)                                                                                                     |
| V (Å <sup>3</sup> )                          | 8555.8(3)                                                                                                     | 2195.72(8)                                                                                                    |
| Z                                            | 4                                                                                                             | 1                                                                                                             |
| μ (mm <sup>-1</sup> )                        | 0.549                                                                                                         | 0.660                                                                                                         |
| T (K)                                        | 150.00(10)                                                                                                    | 150.00(10)                                                                                                    |
| ρ <sub>calc</sub> (g cm <sup>-3</sup> )      | 1.367                                                                                                         | 1.470                                                                                                         |
| F(000)                                       | 3608.0                                                                                                        | 994.0                                                                                                         |
| θ range(deg)                                 | 1.707 to 25.000                                                                                               | 1.601 to 25.000                                                                                               |
| data/restraints/parameters                   | 15054/ 34/ 1006                                                                                               | 7746/ 0/ 536                                                                                                  |
| R1, wR2 [I>2σ(I)]                            | 0.0563, 0.1501                                                                                                | 0.0473, 0.1263                                                                                                |
| R1, wR2(all data)                            | 0.0722, 0.1618                                                                                                | 0.0549, 0.1334                                                                                                |
| GOF                                          | 1.037                                                                                                         | 1.051                                                                                                         |
| largest diff. peak/hole [e Å <sup>-3</sup> ] | 2.10/ -0.88                                                                                                   | 1.29/ -1.29                                                                                                   |

**Table S2a** Selected experimental and DFT-calculated bond lengths (Å)

| Bond lengths (Å) | [2](ClO <sub>4</sub> ) <sub>2</sub> |       | 2a       |       | 3a        |       | [4](ClO <sub>4</sub> ) <sub>2</sub> |       | [5](ClO <sub>4</sub> ) <sub>2</sub> |       |
|------------------|-------------------------------------|-------|----------|-------|-----------|-------|-------------------------------------|-------|-------------------------------------|-------|
|                  | X-ray                               | DFT   | X-ray    | DFT   | X-ray     | DFT   | X-ray                               | DFT   | X-ray                               | DFT   |
| Ru1-N1           | 2.038(2)                            | 2.090 | 2.031(6) | 2.075 | 2.029(8)  | 2.075 | 2.042(4)                            | 2.090 | 2.044(4)                            | 2.088 |
| Ru1-N2           | 2.045(19)                           | 2.109 | 2.022(5) | 1.999 | 2.006(7)  | 1.999 | 2.034(5)                            | 2.099 | 2.042(5)                            | 2.097 |
| Ru1-O1           | 2.007(17)                           | 2.044 | 2.035(5) | 2.085 | 2.037(6)  | 2.090 | 2.018(4)                            | 2.042 | 2.013(4)                            | 2.041 |
| Ru1-O2           | 1.996(17)                           | 2.030 | 1.978(5) | 2.041 | 2.016(6)  | 2.041 | 1.996(4)                            | 2.041 | 2.004(4)                            | 2.033 |
| Ru1-O3           | 1.996(17)                           | 2.033 | 1.997(4) | 2.070 | 2.017(6)  | 2.071 | 1.993(4)                            | 2.025 | 1.991(4)                            | 2.028 |
| Ru1-O4           | 2.015(17)                           | 2.038 | 2.042(5) | 2.112 | 2.030(6)  | 2.110 | 2.016(4)                            | 2.038 | 2.017(5)                            | 2.039 |
| Ru2-N3           | -                                   | -     | 2.001(5) | 1.998 | 2.018(8)  | 2.000 | 2.040(5)                            | 2.089 | -                                   | -     |
| Ru2-N4           | -                                   | -     | 2.031(5) | 2.075 | 2.020(8)  | 2.070 | 2.033(5)                            | 2.092 | -                                   | -     |
| Ru2-O5           | -                                   | -     | 2.031(5) | 2.111 | 2.031(6)  | 2.111 | 2.011(4)                            | 2.046 | -                                   | -     |
| Ru2-O6           | -                                   | -     | 2.007(4) | 2.071 | 2.020(6)  | 2.063 | 1.991(4)                            | 2.036 | -                                   | -     |
| Ru2-O7           | -                                   | -     | 1.979(5) | 2.040 | 1.996(6)  | 2.043 | 1.997(4)                            | 2.028 | -                                   | -     |
| Ru2-O8           | -                                   | -     | 2.023(5) | 2.085 | 2.048(6)  | 2.098 | 2.012(4)                            | 2.046 | -                                   | -     |
| N2-C6            | 1.290(3)                            | 1.291 | 1.318(9) | 1.369 | 1.327(11) | 1.367 | 1.282(7)                            | 1.291 | 1.282(9)                            | 1.291 |
| N3-C10           | -                                   | -     | -        | -     | 1.340(11) | 1.368 | -                                   | -     | -                                   | -     |
| N3-C9            | -                                   | -     | 1.338(9) | 1.369 | -         | -     | -                                   | -     | -                                   | -     |
| N3-C11           | -                                   | -     | -        | -     | -         | -     | 1.268(8)                            | 1.291 | -                                   | -     |
| C6-O9            | -                                   | -     | 1.248(8) | 1.232 | 1.248(10) | 1.234 | -                                   | -     | -                                   | -     |
| C10-O10          | -                                   | -     | -        | -     | 1.262(10) | 1.234 | -                                   | -     | -                                   | -     |
| C9-O10           | -                                   | -     | 1.248(8) | 1.232 | -         | -     | -                                   | -     | -                                   | -     |
| Ru1---<br>Ru2    | 6.541                               | 6.339 | 6.081    | 6.106 | 6.541     | 6.614 | 7.361                               | 7.408 | 7.784                               | 8.397 |

**Table S2b** Selected experimental and DFT-calculated bond lengths (Å)

| Bond lengths (Å) | [7](ClO <sub>4</sub> ) <sub>2</sub> |       | [8](ClO <sub>4</sub> ) <sub>2</sub> |        |
|------------------|-------------------------------------|-------|-------------------------------------|--------|
|                  | X-ray                               | DFT   | X-ray                               | DFT    |
| Ru1-N1           | 2.122(4)                            | 2.178 | 2.129(3)                            | 2.242  |
| Ru1-N2           | 2.185(4)                            | 2.254 | 2.175(3)                            | 2.323  |
| Ru1-P1           | 2.3588(13)                          | 2.453 | 2.3685(9)                           | 2.532  |
| Ru1-P2           | 2.3443(13)                          | 2.459 | 2.3636(9)                           | 2.533  |
| Ru1-C16          | 1.851(5)                            | 1.867 | -                                   | -      |
| Ru1-C9           | -                                   | -     | 1.845(4)                            | 1.927  |
| Ru1-H            | 1.501(15)                           | 1.596 | 1.540                               | 1.65   |
| Ru2-N3           | 2.180(4)                            | 2.255 | -                                   | -      |
| Ru2-N4           | 2.137(4)                            | 2.179 | -                                   | -      |
| Ru2-P3           | 2.3536(13)                          | 2.459 | -                                   | -      |
| Ru2-P4           | 2.3837(13)                          | 2.453 | -                                   | -      |
| Ru2-C17          | 1.837(6)                            | 1.867 | -                                   | -      |
| Ru2-H            | 1.501(15)                           | 1.596 | -                                   | -      |
| N2-C6            | 1.284(6)                            | 1.286 | 1.281(5)                            | 1.325  |
| N3-C10           | 1.296(6)                            | 1.286 | -                                   | -      |
| C16-O1           | 1.135(6)                            | 1.161 | -                                   | -      |
| C17-O2           | 1.156(6)                            | 1.161 | -                                   | -      |
| C9-O1            | -                                   | -     | 1.157(5)                            | 1.196  |
| Ru1---Ru2        | 8.952                               | 9.058 | 10.015                              | 10.799 |



**Table S3a** Selected experimental and DFT-calculated bond angles (deg.)

| Bond angles (degree) | [2](ClO <sub>4</sub> ) <sub>2</sub> |        | 2a         |        | 3a       |       | [4](ClO <sub>4</sub> ) <sub>2</sub> |        | [5](ClO <sub>4</sub> ) <sub>2</sub> |        |
|----------------------|-------------------------------------|--------|------------|--------|----------|-------|-------------------------------------|--------|-------------------------------------|--------|
|                      | X-ray                               | DFT    | X-ray      | DFT    | X-ray    | DFT   | X-ray                               | DFT    | X-ray                               | DFT    |
| N1-Ru1-N2            | 79.01(8)                            | 78.16  | 80.2(2)    | 80.75  | 79.9(3)  | 80.6  | 79.26(19)                           | 78.10  | 79.1(2)                             | 78.18  |
| N1-Ru1-O1            | 177.76(8)                           | 175.71 | 176.9(2)   | 177.33 | 176.2(3) | 176.6 | 176.80(17)                          | 175.5  | 178.0(2)                            | 175.23 |
| N1-Ru1-O2            | 89.36(7)                            | 88.12  | 87.1(2)    | 86.35  | 88.1(3)  | 84.9  | 88.33(17)                           | 89.39  | 89.17(18)                           | 88.92  |
| N1-Ru1-O3            | 91.26(8)                            | 92.39  | 92.3(2)    | 92.94  | 92.2(3)  | 94.1  | 91.34(17)                           | 91.60  | 92.16(19)                           | 91.90  |
| N1-Ru1-O4            | 94.03(8)                            | 94.87  | 94.9(2)    | 94.99  | 97.6(3)  | 94.7  | 94.47(17)                           | 95.41  | 94.7(2)                             | 95.26  |
| N2-Ru1-O1            | 98.99(8)                            | 98.38  | 96.8(2)    | 97.11  | 96.5(3)  | 97.7  | 97.56(17)                           | 97.60  | 98.9(2)                             | 97.38  |
| N2-Ru1-O2            | 91.07(7)                            | 92.81  | 93.0(2)    | 93.20  | 94.9(3)  | 94.9  | 90.85(16)                           | 95.72  | 90.99(19)                           | 95.97  |
| N2-Ru1-O3            | 88.20(8)                            | 88.05  | 88.1(2)    | 90.39  | 89.0(3)  | 88.8  | 87.40(17)                           | 85.53  | 88.7(2)                             | 85.32  |
| N2-Ru1-O4            | 173.04(8)                           | 172.73 | 174.8(2)   | 175.18 | 177.3(3) | 173.9 | 173.59(17)                          | 171.98 | 173.7(2)                            | 171.76 |
| O1-Ru1-O2            | 91.68(7)                            | 89.52  | 94.0(19)   | 92.19  | 93.4(2)  | 92.2  | 91.39(16)                           | 89.67  | 91.26(18)                           | 89.79  |
| O1-Ru1-O3            | 87.67(7)                            | 90.01  | 86.69(19)  | 88.67  | 86.5(3)  | 88.8  | 88.84(16)                           | 89.42  | 87.39(19)                           | 89.49  |
| O1-Ru1-O4            | 87.97(7)                            | 88.67  | 88.0(2)    | 87.20  | 86.0(2)  | 87.2  | 88.71(16)                           | 88.98  | 87.30(19)                           | 89.31  |
| O2-Ru1-O3            | 178.93(7)                           | 179.07 | 178.62(19) | 176.18 | 176.1(2) | 176.0 | 178.25(17)                          | 178.54 | 178.53(18)                          | 178.60 |
| O2-Ru1-O4            | 88.95(7)                            | 89.00  | 88.4(2)    | 88.77  | 85.9(2)  | 88.4  | 90.31(16)                           | 88.87  | 89.87(19)                           | 88.83  |
| O3-Ru1-O4            | 91.87(7)                            | 90.20  | 90.5(2)    | 87.55  | 90.2(2)  | 87.8  | 91.43(16)                           | 89.98  | 90.64(19)                           | 89.96  |
| N3-Ru2-N4            | -                                   | -      | 80.5(2)    | 80.74  | 80.7(3)  | 81.0  | 79.0(2)                             | 78.12  | -                                   | -      |
| N3-Ru2-O5            | -                                   | -      | 174.0(2)   | 175.18 | 175.0(3) | 176.1 | 174.31(19)                          | 173.49 | -                                   | -      |
| N3-Ru2-O6            | -                                   | -      | 87.8(2)    | 90.37  | 88.8(3)  | 90.5  | 86.22(18)                           | 88.77  | -                                   | -      |
| N3-Ru2-O7            | -                                   | -      | 94.6(2)    | 93.09  | 93.1(3)  | 93.6  | 92.85(18)                           | 91.88  | -                                   | -      |
| N3-Ru2-O8            | -                                   | -      | 96.2(2)    | 97.16  | 96.5(3)  | 96.4  | 97.0(2)                             | 96.80  | -                                   | -      |
| N4-Ru2-O5            | -                                   | -      | 94.0(2)    | 95.02  | 94.4(3)  | 95.4  | 95.82(18)                           | 95.64  | -                                   | -      |

|                    |   |   |            |        |          |       |            |        |   |   |
|--------------------|---|---|------------|--------|----------|-------|------------|--------|---|---|
| N4-<br>Ru2-O6      | - | - | 92.88(19)  | 93.03  | 92.6(3)  | 89.3  | 92.63(18)  | 94.62  | - | - |
| N4-<br>Ru2-O7      | - | - | 86.9(2)    | 86.14  | 86.7(3)  | 88.6  | 88.14(18)  | 85.68  | - | - |
| N4-<br>Ru2-O8      | - | - | 176.7(2)   | 177.32 | 177.2(3) | 177.4 | 175.92(19) | 173.18 | - | - |
| O5-<br>Ru2-O6      | - | - | 90.2(2)    | 87.54  | 90.4(2)  | 87.9  | 91.74(17)  | 89.92  | - | - |
| O5-<br>Ru2-O7      | - | - | 87.4(2)    | 88.99  | 87.6(2)  | 87.9  | 89.27(17)  | 89.45  | - | - |
| O5-<br>Ru2-O8      | - | - | 89.3(2)    | 87.14  | 88.4(2)  | 87.2  | 88.24(17)  | 89.57  | - | - |
| O6-<br>Ru2-O7      | - | - | 177.56(18) | 176.26 | 177.9(3) | 175.1 | 178.66(17) | 179.33 | - | - |
| O6-<br>Ru2-O8      | - | - | 86.87(19)  | 88.63  | 87.1(3)  | 90.5  | 87.61(17)  | 89.77  | - | - |
| O7-<br>Ru2-O8      | - | - | 93.5(2)    | 92.35  | 93.6(2)  | 91.8  | 91.54(17)  | 89.99  | - | - |
| N2-C6-<br>O9       | - | - | 127.6(7)   | 126.86 | 128.3(8) | 126.8 | -          | -      | - | - |
| N3-<br>C10-<br>O10 | - | - | -          | -      | 127.1(8) | 127.1 | -          | -      | - | - |
| N3-C9-<br>O10      | - | - | 127.1(7)   | 126.96 | -        | -     | -          | -      | - | - |

**Table S3b** Selected experimental and DFT-calculated bond angles (deg.)

| Bond angles (degree) | [7](ClO <sub>4</sub> ) <sub>2</sub> |        | [8](ClO <sub>4</sub> ) <sub>2</sub> |        |
|----------------------|-------------------------------------|--------|-------------------------------------|--------|
|                      | X-ray                               | DFT    | X-ray                               | DFT    |
| N1-Ru1-N2            | 76.32(14)                           | 73.73  | 75.55(11)                           | 75.03  |
| N1-Ru1-P1            | 90.96(11)                           | 91.49  | 90.37(8)                            | 92.16  |
| N1-Ru1-P2            | 90.81(11)                           | 91.90  | 90.31(8)                            | 91.28  |
| N1-Ru1-C16           | 177.67(19)                          | 177.40 | -                                   | -      |
| N1-Ru1-C9            | -                                   | -      | 179.11(14)                          | 178.57 |
| N1-Ru1-HA            | 93.53                               | 92.64  | 91.29                               | 92.29  |
| N2-Ru1-P1            | 102.87(10)                          | 96.05  | 95.17(8)                            | 95.62  |
| N2-Ru1-P2            | 92.82(10)                           | 98.39  | 94.49(8)                            | 98.07  |
| N2-Ru1-C16           | 101.90(18)                          | 102.66 | -                                   | -      |
| N2-Ru1-C9            | -                                   | -      | 104.56(15)                          | 103.59 |
| N2-Ru1-HA            | 168.60                              | 167.29 | 166.41                              | 167.31 |
| P1-Ru1-P2            | 164.19(5)                           | 165.55 | 170.18(3)                           | 166.31 |
| P1-Ru1-C16           | 87.97(16)                           | 88.82  | -                                   | -      |
| P1-Ru1-C9            | -                                   | -      | 90.50(12)                           | 88.30  |
| P1-Ru1-HA            | 71.67                               | 82.65  | 88.95                               | 84.27  |
| P2-Ru1-C16           | 90.78(16)                           | 88.41  | -                                   | -      |
| P2-Ru1-C9            | -                                   | -      | 88.80(12)                           | 88.58  |
| P2-Ru1-HA            | 92.53                               | 83.17  | 81.25                               | 82.35  |
| C16-Ru1-HA           | 88.10                               | 89.96  | -                                   | -      |
| C9-Ru1-HA            | -                                   | -      | 88.67                               | 89.10  |
| N3-Ru2-N4            | 75.99(15)                           | 74.71  | -                                   | -      |
| N3-Ru2-P3            | 96.40(11)                           | 97.91  | -                                   | -      |
| N3-Ru2-P4            | 92.49(11)                           | 96.15  | -                                   | -      |
| N3-Ru2-C17           | 105.1(2)                            | 102.68 | -                                   | -      |
| N3-Ru2-H             | 161.50                              | 167.26 | -                                   | -      |
| N4-Ru2-P3            | 90.22(12)                           | 91.85  | -                                   | -      |
| N4-Ru2-P4            | 88.96(11)                           | 91.44  | -                                   | -      |
| N4-Ru2-C17           | 177.3(2)                            | 177.39 | -                                   | -      |
| N4-Ru2-H             | 85.62                               | 92.60  | -                                   | -      |
| P3-Ru1-P4            | 170.59(5)                           | 165.92 | -                                   | -      |
| P3-Ru2-C17           | 87.25(16)                           | 88.50  | -                                   | -      |
| P3-Ru2-H             | 81.69                               | 83.42  | -                                   | -      |
| P4-Ru2-C17           | 93.40(16)                           | 88.82  | -                                   | -      |
| P4-Ru2-H             | 88.91                               | 87.76  | -                                   | -      |
| C17-Ru2-H            | 93.17                               | 90.00  | -                                   | -      |

**Table S4** Determination of solution magnetic moment (Evans method) of **2<sup>2+</sup>**, **2a**, **3<sup>2+</sup>**, **3a**, **4<sup>2+</sup>**, **4a**, **5<sup>2+</sup>**, **5a**

Solution magnetic moment of Ru<sup>III</sup>-Ru<sup>III</sup> derived **2<sup>2+</sup>**, **2a**, **3<sup>2+</sup>**, **3a**, **4<sup>2+</sup>**, **4a**, **5<sup>2+</sup>** and **5a** were determined by Evans method. Pure **2<sup>2+</sup>**, **2a**, **3<sup>2+</sup>**, **3a**, **4<sup>2+</sup>**, **4a**, **5<sup>2+</sup>** and **5a** in CDCl<sub>3</sub>, CDCl<sub>3</sub>, (CD<sub>3</sub>)<sub>2</sub>SO, CDCl<sub>3</sub>, CDCl<sub>3</sub>, CDCl<sub>3</sub>, (CD<sub>3</sub>)<sub>2</sub>SO and (CD<sub>3</sub>)<sub>2</sub>SO were taken in a 5 mm NMR tube. In another coaxial NMR tube only reference CDCl<sub>3</sub>, CDCl<sub>3</sub>, (CD<sub>3</sub>)<sub>2</sub>SO, CDCl<sub>3</sub>, CDCl<sub>3</sub>, CDCl<sub>3</sub>, (CD<sub>3</sub>)<sub>2</sub>SO and (CD<sub>3</sub>)<sub>2</sub>SO solvent were taken. Proton NMR of the sample together with the Evans tube was recorded, which showed two peaks corresponding to the solvent residual peak of CDCl<sub>3</sub>, CDCl<sub>3</sub>, (CD<sub>3</sub>)<sub>2</sub>SO, CDCl<sub>3</sub>, CDCl<sub>3</sub>, CDCl<sub>3</sub>, (CD<sub>3</sub>)<sub>2</sub>SO and (CD<sub>3</sub>)<sub>2</sub>SO in the sample and reference. The shift in the position due to the paramagnetic Ru(III) was noted. Experiment was carried out in 400 MHz NMR spectrometer at 298 K.

$$\chi_g = \frac{-3\Delta f}{4\pi\nu_0 m} + \chi_0 + \frac{\chi_0(d_0 - d_s)}{m} \quad \text{----- eq. 1}$$

The mass susceptibility ( $\chi_g$ ) was calculated using eq. 1, where  $\Delta f$  (Hz),  $\nu_0$  (Hz),  $m$  (g/cm<sup>3</sup>),  $d_0/d_s$  and  $\chi_0$  corresponded to shift in frequency, operating frequency of NMR spectrometer, concentration of the substance, density of pure solvent and solution, and mass susceptibility of the solvent, respectively. The molar susceptibility ( $\chi_m$ ) was obtained by multiplying the mass susceptibility ( $\chi_g$ ) by the molar mass. This result was used to calculate the effective magnetic moment  $\mu_{\text{eff}}$  in eq. 2.

$$\mu_{\text{eff}} = 2.83 \times (\chi_M \text{ T})^{1/2} \quad \text{BM} \quad \text{----- eq. 2}$$

Calculation for **2<sup>2+</sup>**:

3.16 mg of **2<sup>2+</sup>** was dissolved in ~0.54 cm<sup>3</sup> of CDCl<sub>3</sub>. The shift in the position due to the paramagnetic Ru(III) = 0.072 ppm.

$$\begin{aligned}\chi_M &= 0.0030 \text{ cm}^3/\text{mol} \\ \mu_{\text{eff}} &= 2.83 \times (0.0030 \times 298.15)^{1/2} \text{ BM} \\ &= 2.70 \text{ BM}\end{aligned}$$

Calculation for **2a**:

2.8 mg of **2a** was dissolved in ~0.53 cm<sup>3</sup> of CDCl<sub>3</sub>. The shift in the position due to the paramagnetic Ru(III) = 0.075 ppm.

$$\begin{aligned}\chi_M &= 0.0029 \text{ cm}^3/\text{mol} \\ \mu_{\text{eff}} &= 2.83 \times (0.0029 \times 298.15)^{1/2} \text{ BM} \\ &= 2.65 \text{ BM}\end{aligned}$$

Calculation for **3<sup>2+</sup>**:

4.6 mg of **3<sup>2+</sup>** was dissolved in ~0.54 cm<sup>3</sup> of DMSO-d<sub>6</sub>. The shift in the position due to the paramagnetic Ru(III) = 0.099 ppm.

$$\begin{aligned}\chi_M &= 0.0034 \text{ cm}^3/\text{mol} \\ \mu_{\text{eff}} &= 2.83 \times (0.0034 \times 298.15)^{1/2} \text{ BM} \\ &= 2.86 \text{ BM}\end{aligned}$$

Calculation for **3a**:

3.97 mg of **3a** was dissolved in ~0.52 cm<sup>3</sup> of CDCl<sub>3</sub>. The shift in the position due to the paramagnetic Ru(III) = 0.097 ppm.

$$\begin{aligned}\chi_M &= 0.0027 \text{ cm}^3/\text{mol} \\ \mu_{\text{eff}} &= 2.83 \times (0.0027 \times 298.15)^{1/2} \text{ BM} \\ &= 2.55 \text{ BM}\end{aligned}$$

Calculation for **4**<sup>2+</sup>:

4.3 mg of **4**<sup>2+</sup> was dissolved in ~0.53 cm<sup>3</sup> of CDCl<sub>3</sub>. The shift in the position due to the paramagnetic Ru(III) = 0.099 ppm.

$$\begin{aligned}\chi_M &= 0.0031 \text{ cm}^3/\text{mol} \\ \mu_{\text{eff}} &= 2.83 \times (0.0031 \times 298.15)^{1/2} \text{ BM} \\ &= 2.73 \text{ BM}\end{aligned}$$

Calculation for **4a**:

3.71 mg of **4a** was dissolved in ~0.52 cm<sup>3</sup> of CDCl<sub>3</sub>. The shift in the position due to the paramagnetic Ru(III) = 0.092 ppm.

$$\begin{aligned}\chi_M &= 0.0034 \text{ cm}^3/\text{mol} \\ \mu_{\text{eff}} &= 2.83 \times (0.0034 \times 298.15)^{1/2} \text{ BM} \\ &= 2.86 \text{ BM}\end{aligned}$$

Calculation for **5**<sup>2+</sup>:

3.96 mg of **5**<sup>2+</sup> was dissolved in ~0.41 cm<sup>3</sup> of (CD<sub>3</sub>)<sub>2</sub>SO. The shift in the position due to the paramagnetic Ru(III) = 0.113 ppm.

$$\begin{aligned}\chi_M &= 0.0026 \text{ cm}^3/\text{mol} \\ \mu_{\text{eff}} &= 2.83 \times (0.0026 \times 298.15)^{1/2} \text{ BM} \\ &= 2.50 \text{ BM}\end{aligned}$$

Calculation for **5a**:

3.96 mg of **5a** was dissolved in ~0.56 cm<sup>3</sup> of (CD<sub>3</sub>)<sub>2</sub>SO. The shift in the position due to the paramagnetic Ru(III) = 0.096 ppm.

$$\begin{aligned}\chi_M &= 0.0029 \text{ cm}^3/\text{mol} \\ \mu_{\text{eff}} &= 2.83 \times (0.0029 \times 298.15)^{1/2} \text{ BM} \\ &= 2.64 \text{ BM}\end{aligned}$$

**Table S5** TD-DFT (UB3LYP/6-31G\*\*/LANL2DZ) calculated electronic transitions for **2<sup>n</sup>**, **3<sup>n</sup>**, **4<sup>n</sup>**, **5<sup>n</sup>**, **2a**, **3a**, **4a** and **5a** ( $n = +2, 0$ ) in CH<sub>3</sub>CN

| $\lambda$ /nm<br>expt<br>(DFT) | $\varepsilon$ / dm <sup>3</sup><br>mol <sup>-1</sup> cm <sup>-1</sup><br>( <i>f</i> ) | Transitions                                                                               | Character                                                                                           |
|--------------------------------|---------------------------------------------------------------------------------------|-------------------------------------------------------------------------------------------|-----------------------------------------------------------------------------------------------------|
| <b>2 (S=0)</b>                 |                                                                                       |                                                                                           |                                                                                                     |
| 590<br>(518)<br>(517)          | 11240<br>(0.070)<br>(0.106)                                                           | HOMO-2→LUMO(0.66)<br>HOMO-3→LUMO(0.67)                                                    | Ru(dπ)→L(π*)<br>Ru(dπ)→L(π*)                                                                        |
| 398<br>(405)<br>(358)          | 10390<br>(0.071)<br>(0.040)                                                           | HOMO-1→LUMO+2(0.41)<br>HOMO→LUMO+3(0.39)<br>HOMO-4→LUMO+2(0.36)<br>HOMO-3→LUMO+2(0.21)    | Ru(dπ)/acac(π)→L(π*)<br>Ru(dπ)/acac(π)→L(π*)<br>Ru(dπ)→L(π*)<br>Ru(dπ)→L(π*)                        |
| 273<br>(327)                   | 37970<br>(0.025)                                                                      | HOMO-4→LUMO+6(0.39)<br>HOMO-2→LUMO+5(0.13)                                                | Ru(dπ)→acac(π*)<br>Ru(dπ)→acac(π*)                                                                  |
| <b>3(S=0)</b>                  |                                                                                       |                                                                                           |                                                                                                     |
| 583<br>(516)                   | 20210<br>(0.064)                                                                      | HOMO-2→LUMO(0.61)                                                                         | Ru(dπ)/acac(π)→L(π*)                                                                                |
| 399<br>(410)<br>(404)          | 20820<br>(0.069)<br>(0.036)                                                           | HOMO→LUMO+3(0.55)<br>HOMO→LUMO+5(0.23)<br>HOMO-1→LUMO+3(0.52)<br>HOMO-1→LUMO+8(0.15)      | Ru(dπ)/acac(π)→L(π*)<br>Ru(dπ)/acac(π)→L(π*)<br>Ru(dπ)/acac(π)→L(π*)<br>Ru(dπ)/acac(π)→L(π*)/Ru(dπ) |
| 274<br>(343)                   | 59960<br>(0.082)                                                                      | HOMO-5→LUMO+4(0.23)<br>HOMO-4→LUMO+5(0.22)                                                | Ru(dπ)→acac(π*)<br>Ru(dπ)→acac(π*)                                                                  |
| <b>4 (S=0)</b>                 |                                                                                       |                                                                                           |                                                                                                     |
| 582<br>(509)<br>(505)          | 20080<br>(0.036)<br>(0.201)                                                           | HOMO-3→LUMO(0.44)<br>HOMO-2→LUMO+1(0.42)<br>HOMO-2→LUMO(0.46)<br>HOMO-3→LUMO(0.39)        | Ru(dπ)→L(π*)<br>Ru(dπ)→L(π*)<br>Ru(dπ)→L(π*)<br>Ru(dπ)→L(π*)                                        |
| 399<br>(408)<br>(360)          | 18830<br>(0.055)<br>(0.062)                                                           | HOMO→LUMO+3(0.47)<br>HOMO→LUMO+5(0.14)<br>HOMO-4→LUMO+3(0.32)<br>HOMO-4→LUMO+7(0.21)      | Ru(dπ)/acac(π)→L(π*)<br>Ru(dπ)/acac(π)→acac(π*)<br>Ru(dπ)→L(π*)<br>Ru(dπ)→acac(π*)                  |
| 276<br>(268)<br>(266)          | 36230<br>(0.061)<br>(0.041)                                                           | HOMO-1→LUMO+10(0.38)<br>HOMO-1→LUMO+9(0.32)<br>HOMO-7→LUMO+4(0.41)<br>HOMO-6→LUMO+5(0.29) | Ru(dπ)/acac(π)→Ru(dπ)/L(π*)<br>Ru(dπ)/acac(π)→Ru(dπ)/L(π*)<br>acac(π)→acac(π*)<br>acac(π)→acac(π*)  |
| <b>5 (S=0)</b>                 |                                                                                       |                                                                                           |                                                                                                     |
| 588<br>(504)                   | 15930<br>(0.226)                                                                      | HOMO-3→LUMO(0.41)<br>HOMO-2→LUMO(0.31)                                                    | Ru(dπ)→L(π*)<br>Ru(dπ)→L(π*)                                                                        |
| 392<br>(407)                   | 20400<br>(0.116)                                                                      | HOMO-1→LUMO+2(0.51)<br>HOMO→LUMO+3(0.29)                                                  | Ru(dπ)/acac(π)→L(π*)<br>Ru(dπ)/acac(π)→L(π*)                                                        |

|                             |                             |                                                                                                                  |                                                                                                 |
|-----------------------------|-----------------------------|------------------------------------------------------------------------------------------------------------------|-------------------------------------------------------------------------------------------------|
| (360)                       | (0.047)                     | HOMO-4→LUMO+3(0.38)<br>HOMO-4→LUMO+7(0.27)                                                                       | Ru(dπ)→L(π*)<br>Ru(dπ)→acac(π*)                                                                 |
| 273<br>(342)                | 64310<br>(0.038)            | HOMO-4→LUMO+5(0.37)<br>HOMO-4→LUMO+12(0.25)                                                                      | Ru(dπ)→acac(π*)<br>Ru(dπ)→Ru(dπ)/L(π*)                                                          |
| <b>2<sup>2+</sup> (S=1)</b> |                             |                                                                                                                  |                                                                                                 |
| 584<br>(593)                | 7515<br>(0.062)             | HOMO-4(β)→LUMO(β)(0.70)                                                                                          | acac(π)→Ru(dπ)/acac(π*)                                                                         |
| 479<br>(537)                | 13805<br>(0.026)            | HOMO-1(β)→LUMO(β)(0.57)<br>HOMO(β)→LUMO+1(β)(0.55)                                                               | Ru(dπ)/acac(π)→Ru(dπ)/acac(π*)<br>Ru(dπ)/acac(π)→Ru(dπ)/acac(π*)                                |
| 382<br>(397)                | 16530<br>(0.033)            | HOMO-3(α)→LUMO(α)(0.56)<br>HOMO-1(β)→LUMO+2(β)(0.29)                                                             | Ru(dπ)/acac(π)→L(π*)<br>Ru(dπ)/acac(π)→L(π*)                                                    |
| 331<br>(309)                | 25275<br>(0.034)            | HOMO-3(β)→LUMO+7(β)(0.44)<br>HOMO-1(α)→LUMO+4(α)(0.20)                                                           | Ru(dπ)/acac(π)→acac(π*)<br>acac(π)/Ru(dπ)→acac(π*)                                              |
| 276<br>(277)                | 60535<br>(0.080)            | HOMO-6(α)→LUMO+5(α)(0.43)<br>HOMO-7(α)→LUMO+4(α)(0.39)                                                           | acac(π)/Ru(dπ)→acac(π*)<br>acac(π)/Ru(dπ)→acac(π*)                                              |
| <b>3<sup>2+</sup> (S=1)</b> |                             |                                                                                                                  |                                                                                                 |
| 505<br>(542)                | 6670<br>(0.032)             | HOMO-6(β)→LUMO+1(β)(0.73)                                                                                        | Ru(dπ)/acac(π)→Ru(dπ)/acac(π*)                                                                  |
| 381<br>(393)                | 21180<br>(0.039)            | HOMO-3(α)→LUMO(α)(0.44)<br>HOMO-6(α)→LUMO(α)(0.19)                                                               | acac(π)→L(π*)<br>Ru(dπ)/acac(π)→L(π*)                                                           |
| 336<br>(308)                | 23630<br>(0.039)            | HOMO-2(β)→LUMO+4(β)(0.45)<br>HOMO-3(β)→LUMO+5(β)(0.44)                                                           | acac(π)/Ru(dπ)→L(π*)<br>acac(π)/Ru(dπ)→L(π*)                                                    |
| 273<br>(272)                | 46060<br>(0.178)            | HOMO-8(α)→LUMO(α)(0.46)<br>HOMO-8(α)→LUMO+1(α)(0.29)                                                             | acac(π)→L(π*)<br>acac(π)→L(π*)                                                                  |
| <b>4<sup>2+</sup> (S=1)</b> |                             |                                                                                                                  |                                                                                                 |
| 577<br>(580)<br>(543)       | 7640<br>(0.054)<br>(0.031)  | HOMO-5(β)→LUMO+1(β)(0.71)<br>HOMO-6(β)→LUMO(β)(0.80)                                                             | acac(π)/Ru(dπ)→Ru(dπ)/acac(π*)<br>acac(π)/Ru(dπ)→Ru(dπ)/acac(π*)                                |
| 469<br>(396)                | 12210<br>(0.042)            | HOMO-2(α)→LUMO(α)(0.57)<br>HOMO-1(β)→LUMO+2(β)(0.27)                                                             | acac(π)/Ru(dπ)→L(π*)<br>Ru(dπ)/acac(π)→L(π*)                                                    |
| 378<br>(393)                | 14420<br>(0.037)            | HOMO-3(α)→LUMO+1(α)(0.49)<br>HOMO-3(α)→LUMO(α)(0.34)                                                             | Ru(dπ)/acac(π)→L(π*)<br>Ru(dπ)/acac(π)→L(π*)                                                    |
| 274<br>(278)<br>(271)       | 58260<br>(0.093)<br>(0.038) | HOMO-4(α)→LUMO+6(α)(0.35)<br>HOMO-2(α)→LUMO+4(α)(0.33)<br>HOMO-6(α)→LUMO+2(α)(0.58)<br>HOMO-7(α)→LUMO+2(α)(0.49) | acac(π)/Ru(dπ)→acac(π*)<br>Ru(dπ)/acac(π)→L(π*)<br>acac(π)/Ru(dπ)→L(π*)<br>acac(π)/Ru(dπ)→L(π*) |
| <b>5<sup>2+</sup> (S=1)</b> |                             |                                                                                                                  |                                                                                                 |
| 571<br>(581)                | 6640<br>(0.071)             | HOMO-4(β)→LUMO+1(β)(0.93)                                                                                        | Ru(dπ)/acac(π)→Ru(dπ)/acac(π*)                                                                  |
| 473<br>(535)                | 12250<br>(0.067)            | HOMO-6(β)→LUMO+1(β)(0.81)                                                                                        | acac(π)/Ru(dπ)→Ru(dπ)/acac(π*)                                                                  |
| 381<br>(394)                | 13040<br>(0.048)            | HOMO-3(α)→LUMO+1(α)(0.46)<br>HOMO-3(α)→LUMO(α)(0.43)                                                             | Ru(dπ)/acac(π)→L(π*)<br>Ru(dπ)/acac(π)→L(π*)                                                    |



|                       |                             |                                                                                                                        |                                                                                                                                                         |
|-----------------------|-----------------------------|------------------------------------------------------------------------------------------------------------------------|---------------------------------------------------------------------------------------------------------------------------------------------------------|
| 328<br>(309)          | 20000<br>(0.031)            | HOMO-3( $\beta$ ) $\rightarrow$ LUMO+7( $\beta$ )(0.49)<br>HOMO-2( $\beta$ ) $\rightarrow$ LUMO+7( $\beta$ )(0.44)     | Ru(d $\pi$ )/acac( $\pi$ ) $\rightarrow$ acac( $\pi^*$ )<br>Ru(d $\pi$ )/acac( $\pi$ ) $\rightarrow$ acac( $\pi^*$ )                                    |
| 276<br>(276)          | 60080<br>(0.043)            | HOMO-4( $\beta$ ) $\rightarrow$ LUMO+7( $\beta$ )(0.54)<br>HOMO-6( $\beta$ ) $\rightarrow$ LUMO+7( $\beta$ )(0.54)     | Ru(d $\pi$ )/acac( $\pi$ ) $\rightarrow$ acac( $\pi^*$ )<br>acac( $\pi$ )/Ru(d $\pi$ ) $\rightarrow$ acac( $\pi^*$ )                                    |
| 234<br>(267)          | 39550<br>(0.177)            | HOMO-9( $\alpha$ ) $\rightarrow$ LUMO+1( $\alpha$ )(0.39)<br>HOMO-6( $\alpha$ ) $\rightarrow$ LUMO+7( $\alpha$ )(0.27) | acac( $\pi$ )/Ru(d $\pi$ ) $\rightarrow$ L( $\pi^*$ )<br>Ru(d $\pi$ ) $\rightarrow$ acac( $\pi^*$ )                                                     |
| <b>2a (S=1)</b>       |                             |                                                                                                                        |                                                                                                                                                         |
| 508<br>(527)          | 14920<br>(0.046)            | HOMO-4( $\beta$ ) $\rightarrow$ LUMO+1( $\beta$ )(0.66)                                                                | Ru(d $\pi$ )/L( $\pi$ )/acac( $\pi$ ) $\rightarrow$ Ru(d $\pi$ )/acac( $\pi^*$ )/L( $\pi^*$ )                                                           |
| 438<br>(453)          | 27040<br>(0.026)            | HOMO-8( $\beta$ ) $\rightarrow$ LUMO( $\beta$ )(0.55)<br>HOMO-5( $\beta$ ) $\rightarrow$ LUMO+1( $\beta$ )(0.41)       | acac( $\pi$ )/L( $\pi$ ) $\rightarrow$ Ru(d $\pi$ )/acac( $\pi^*$ )<br>L( $\pi$ )/acac( $\pi$ ) $\rightarrow$ Ru(d $\pi$ )/acac( $\pi^*$ )/L( $\pi^*$ ) |
| 393<br>(370)          | 39450<br>(0.031)            | HOMO( $\beta$ ) $\rightarrow$ LUMO+3( $\beta$ )(0.42)<br>HOMO-3( $\beta$ ) $\rightarrow$ LUMO+2( $\beta$ )(0.35)       | Ru(d $\pi$ )/L( $\pi$ )/acac( $\pi$ ) $\rightarrow$ L( $\pi^*$ )<br>Ru(d $\pi$ )/acac( $\pi$ ) $\rightarrow$ L( $\pi^*$ )                               |
| 333<br>(347)          | 49560<br>(0.052)            | HOMO-3( $\alpha$ ) $\rightarrow$ LUMO( $\alpha$ )(0.32)<br>HOMO-10( $\beta$ ) $\rightarrow$ LUMO( $\beta$ )(0.27)      | Ru(d $\pi$ )/acac( $\pi$ ) $\rightarrow$ L( $\pi^*$ )<br>acac( $\pi$ )/Ru(d $\pi$ ) $\rightarrow$<br>Ru(d $\pi$ )/acac( $\pi^*$ )                       |
| <b>3a (S=1)</b>       |                             |                                                                                                                        |                                                                                                                                                         |
| 508<br>(528)          | 13360<br>(0.042)            | HOMO-4( $\beta$ ) $\rightarrow$ LUMO+1( $\beta$ )(0.82)                                                                | acac( $\pi$ )/Ru(d $\pi$ ) $\rightarrow$ Ru(d $\pi$ )/L( $\pi^*$ )                                                                                      |
| 434<br>(485)          | 25540<br>(0.030)            | HOMO-6( $\beta$ ) $\rightarrow$ LUMO+1( $\beta$ )(0.73)                                                                | L( $\pi$ ) $\rightarrow$ Ru(d $\pi$ )/L( $\pi^*$ )                                                                                                      |
| 384<br>(375)          | 34650<br>(0.035)            | HOMO-1( $\beta$ ) $\rightarrow$ LUMO+2( $\beta$ )(0.42)<br>HOMO-1( $\alpha$ ) $\rightarrow$ LUMO( $\alpha$ )(0.37)     | Ru(d $\pi$ )/acac( $\pi$ )/L( $\pi$ ) $\rightarrow$ L( $\pi^*$ )<br>Ru(d $\pi$ )/acac( $\pi$ )/L( $\pi$ ) $\rightarrow$ L( $\pi^*$ )                    |
| 337<br>(357)          | 39580<br>(0.030)            | HOMO-3( $\beta$ ) $\rightarrow$ LUMO+3( $\beta$ )(0.47)<br>HOMO-2( $\alpha$ ) $\rightarrow$ LUMO+1( $\alpha$ )(0.32)   | Ru(d $\pi$ ) $\rightarrow$ L( $\pi^*$ )<br>Ru(d $\pi$ )/L( $\pi$ ) $\rightarrow$ L( $\pi^*$ )                                                           |
| <b>4a (S=1)</b>       |                             |                                                                                                                        |                                                                                                                                                         |
| 503<br>(532)          | 12740<br>(0.055)            | HOMO-5( $\beta$ ) $\rightarrow$ LUMO( $\beta$ )(0.61)                                                                  | L( $\pi$ ) $\rightarrow$ Ru(d $\pi$ )/acac( $\pi^*$ )                                                                                                   |
| 375<br>(370)          | 38490<br>(0.036)            | HOMO( $\beta$ ) $\rightarrow$ LUMO+3( $\beta$ )(0.36)<br>HOMO-3( $\beta$ ) $\rightarrow$ LUMO+2( $\beta$ )(0.36)       | Ru(d $\pi$ )/L( $\pi$ )/acac( $\pi$ ) $\rightarrow$ acac( $\pi^*$ )<br>Ru(d $\pi$ )/L( $\pi$ ) $\rightarrow$ L( $\pi^*$ )                               |
| 340<br>(342)          | 39500<br>(0.033)            | HOMO-4( $\alpha$ ) $\rightarrow$ LUMO( $\alpha$ )(0.20)<br>HOMO( $\beta$ ) $\rightarrow$ LUMO+5( $\beta$ )(0.19)       | Ru(d $\pi$ )/acac( $\pi$ ) $\rightarrow$ L( $\pi^*$ )<br>Ru(d $\pi$ )/L( $\pi$ )/acac( $\pi$ ) $\rightarrow$ L( $\pi^*$ )                               |
| 273<br>(296)          | 73920<br>(0.038)            | HOMO-5( $\alpha$ ) $\rightarrow$ LUMO+2( $\alpha$ )(0.35)<br>HOMO-4( $\alpha$ ) $\rightarrow$ LUMO+4( $\alpha$ )(0.24) | L( $\pi$ ) $\rightarrow$ L( $\pi^*$ )<br>Ru(d $\pi$ )/acac( $\pi$ ) $\rightarrow$ acac( $\pi^*$ )                                                       |
| <b>5a (S=1)</b>       |                             |                                                                                                                        |                                                                                                                                                         |
| 505<br>(525)<br>(490) | 12710<br>(0.047)<br>(0.031) | HOMO-9( $\beta$ ) $\rightarrow$ LUMO( $\beta$ )(0.86)<br>HOMO-6( $\beta$ ) $\rightarrow$ LUMO+1( $\beta$ )(0.88)       | L( $\pi$ )/acac( $\pi$ )/Ru(d $\pi$ ) $\rightarrow$ Ru(d $\pi$ )/L( $\pi^*$ )<br>acac( $\pi$ )/L( $\pi$ ) $\rightarrow$ Ru(d $\pi$ )                    |
| 374<br>(365)          | 41890<br>(0.032)            | HOMO-2( $\beta$ ) $\rightarrow$ LUMO+3( $\beta$ )(0.47)<br>HOMO( $\alpha$ ) $\rightarrow$ LUMO+3( $\alpha$ )(0.44)     | L( $\pi$ )/Ru(d $\pi$ ) $\rightarrow$ L( $\pi^*$ )/acac( $\pi^*$ )<br>L( $\pi$ )/Ru(d $\pi$ ) $\rightarrow$ L( $\pi^*$ )/acac( $\pi^*$ )                |
| 339                   | 44690                       | HOMO-2( $\beta$ ) $\rightarrow$ LUMO+3( $\beta$ )(0.49)                                                                | L( $\pi$ )/Ru(d $\pi$ ) $\rightarrow$ L( $\pi^*$ )/acac( $\pi^*$ )                                                                                      |

|       |         |                                                           |                                                       |
|-------|---------|-----------------------------------------------------------|-------------------------------------------------------|
| (356) | (0.033) | HOMO-3( $\alpha$ ) $\rightarrow$ LUMO+1( $\alpha$ )(0.18) | Ru(d $\pi$ )/acac( $\pi$ ) $\rightarrow$ L( $\pi^*$ ) |
| 274   | 87420   | HOMO-4( $\alpha$ ) $\rightarrow$ LUMO+5( $\alpha$ )(0.38) | L( $\pi$ )/Ru(d $\pi$ ) $\rightarrow$ acac( $\pi^*$ ) |
| (292) | (0.031) | HOMO-2( $\beta$ ) $\rightarrow$ LUMO+9( $\beta$ )(0.37)   | L( $\pi$ )/Ru(d $\pi$ ) $\rightarrow$ L( $\pi^*$ )    |

**Table S6** DFT calculated selected MO compositions ((U/R)B3LYP/LanL2DZ/6-31G\*\*)

| Complex                                                                       | Energy (eV)        | MO                      | % Contribution Ru/acac/L  |
|-------------------------------------------------------------------------------|--------------------|-------------------------|---------------------------|
| $2^{2+}$ ( $S=1$ )<br>$\Delta E_{((S=0)-(S=1))} = 9326 \text{ cm}^{-1}$       | -8.090             | $\beta$ -LUMO           | 65/28/7                   |
| $2$ ( $S=0$ )<br>$\Delta E_{((S=1)-(S=0))} = 7895 \text{ cm}^{-1}$            | -3.756<br>-1.665   | HOMO<br>LUMO            | 62/31/7<br>14/4/81        |
| $2^{2-}$ ( $S=1$ )<br>$\Delta E_{((S=0)-(S=1))} = 3279 \text{ cm}^{-1}$       | 2.988              | SOMO 1                  | 12/5/83                   |
| $3^{2+}$ ( $S=1$ )<br>$\Delta E_{((S=0)-(S=1))} = 9421 \text{ cm}^{-1}$       | -8.572             | $\beta$ -LUMO           | 69/23/8                   |
| $3$ ( $S=0$ )<br>$\Delta E_{((S=1)-(S=0))} = 7630 \text{ cm}^{-1}$            | -4.034<br>-1.893   | HOMO<br>LUMO            | 63/30/8<br>14/3/83        |
| $3^{2-}$ ( $S=1$ )<br>$\Delta E_{((S=0)-(S=1))} = 4814 \text{ cm}^{-1}$       | 2.780              | SOMO 1                  | 13/4/83                   |
| $4^{2+}$ ( $S=1$ )<br>$\Delta E_{((S=0)-(S=1))} = 9555 \text{ cm}^{-1}$       | -8.028             | $\beta$ -LUMO           | 65/27/8                   |
| $4$ ( $S=0$ )<br>$\Delta E_{((S=1)-(S=0))} = 7467 \text{ cm}^{-1}$            | -3.806<br>-1.734   | HOMO<br>LUMO            | 62/33/5<br>13/4/83        |
| $4^{2-}$ ( $S=1$ )<br>$\Delta E_{((S=0)-(S=1))} = 5533 \text{ cm}^{-1}$       | 2.751              | SOMO 1                  | 13/5/82                   |
| $5^{2+}$ ( $S=1$ )<br>$\Delta E_{((S=0)-(S=1))} = 9765 \text{ cm}^{-1}$       | -7.951             | $\beta$ -LUMO           | 62/32/6                   |
| $5$ ( $S=0$ )<br>$\Delta E_{((S=1)-(S=0))} = 7980 \text{ cm}^{-1}$            | -3.831<br>-1.751   | HOMO<br>LUMO            | 63/32/5<br>13/4/83        |
| $5^{2-}$ ( $S=1$ )<br>$\Delta E_{((S=0)-(S=1))} = 5448 \text{ cm}^{-1}$       | 2.469              | SOMO 1                  | 12/4/84                   |
| Complex                                                                       | Energy (eV)        | MO                      | % Contribution Ru/acac/L" |
| $2a^{4+}$ ( $S=1$ )<br>$\Delta E_{((S=0)-(S=1))} = 2727 \text{ cm}^{-1}$      | -15.650            | $\beta$ -LUMO           | 45/47/8                   |
| $2a^{3+}$ ( $S=3/2$ )<br>$\Delta E_{((S=1/2)-(S=3/2))} = 754 \text{ cm}^{-1}$ | -13.971<br>-12.588 | SOMO 1<br>$\beta$ -LUMO | 26/59/15<br>61/27/12      |
| $2a^{2+}$ ( $S=1$ )<br>$\Delta E_{((S=0)-(S=1))} = 982 \text{ cm}^{-1}$       | -11.267<br>-9.733  | SOMO 1<br>$\beta$ -LUMO | 30/52/18<br>57/24/19      |
| $2a^+$ ( $S=1/2$ )                                                            | -8.230<br>-7.075   | SOMO<br>$\beta$ -LUMO   | 43/37/19<br>43/17/40      |
| $2a$ ( $S=1$ )<br>$\Delta E_{((S=0)-(S=1))} = 8294 \text{ cm}^{-1}$           | -4.738<br>-2.469   | SOMO 1<br>$\beta$ -LUMO | 30/18/52<br>60/26/14      |
| $2a^{2-}$ ( $S=0$ )<br>$\Delta E_{((S=1)-(S=0))} = 9753 \text{ cm}^{-1}$      | 1.995              | HOMO                    | 52/11/37                  |
| $3a^{4+}$ ( $S=1$ )<br>$\Delta E_{((S=0)-(S=1))} = 1295 \text{ cm}^{-1}$      | -14.496            | $\beta$ -LUMO           | 45/51/4                   |
| $3a^{3+}$ ( $S=3/2$ )                                                         | -13.067            | SOMO 1                  | 32/48/20                  |

|                                                       |         |               |          |
|-------------------------------------------------------|---------|---------------|----------|
| $\Delta E_{((S=1/2)-(S=3/2))} = 401 \text{ cm}^{-1}$  | -12.428 | $\beta$ -LUMO | 54/37/9  |
| <b>3a<sup>2+</sup></b> (S=1)                          | -11.030 | SOMO 1        | 34/51/15 |
| $\Delta E_{((S=0)-(S=1))} = 693 \text{ cm}^{-1}$      | -9.485  | $\beta$ -LUMO | 59/26/15 |
| <b>3a<sup>+</sup></b> (S=1/2)                         | -7.788  | SOMO          | 46/15/40 |
|                                                       | -6.152  | $\beta$ -LUMO | 67/21/12 |
| <b>3a</b> (S=1)                                       | -4.930  | SOMO 1        | 36/32/32 |
| $\Delta E_{((S=0)-(S=1))} = 8661 \text{ cm}^{-1}$     | -2.537  | $\beta$ -LUMO | 65/17/18 |
| <b>3a<sup>2-</sup></b> (S=0)                          |         |               |          |
| $\Delta E_{((S=1)-(S=0))} = 10160 \text{ cm}^{-1}$    | 1.911   | HOMO          | 57/12/30 |
| <b>4a<sup>4+</sup></b> (S=1)                          | -14.824 |               |          |
| $\Delta E_{((S=0)-(S=1))} = 6558 \text{ cm}^{-1}$     |         | $\beta$ -LUMO | 4/42/10  |
| <b>4a<sup>3+</sup></b> (S=3/2)                        | -13.230 | SOMO 1        | 30/55/15 |
| $\Delta E_{((S=1/2)-(S=3/2))} = 538 \text{ cm}^{-1}$  | -12.642 | $\beta$ -LUMO | 31/44/25 |
| <b>4a<sup>2+</sup></b> (S=1)                          | -10.843 | SOMO 1        | 31/44/25 |
| $\Delta E_{((S=0)-(S=1))} = 932 \text{ cm}^{-1}$      | -9.096  | $\beta$ -LUMO | 62/25/13 |
| <b>4a<sup>+</sup></b> (S=1/2)                         | -7.553  | SOMO          | 51/35/14 |
|                                                       | -5.921  | $\beta$ -LUMO | 59/13/28 |
| <b>4a</b> (S=1)                                       | -4.817  | SOMO 1        | 28/7/65  |
| $\Delta E_{((S=0)-(S=1))} = 10132 \text{ cm}^{-1}$    | -2.523  | $\beta$ -LUMO | 60/21/19 |
| <b>4a<sup>2-</sup></b> (S=0)                          |         |               |          |
| $\Delta E_{((S=1)-(S=0))} = 9818 \text{ cm}^{-1}$     | 1.348   | HOMO          | 60/12/28 |
| <b>5a<sup>4+</sup></b> (S=1)                          | -14.332 |               |          |
| $\Delta E_{((S=0)-(S=1))} = 8531 \text{ cm}^{-1}$     |         | $\beta$ -LUMO | 45/50/4  |
| <b>5a<sup>3+</sup></b> (S=3/2)                        | -13.144 | SOMO 1        | 33/46/21 |
| $\Delta E_{((S=1/2)-(S=3/2))} = 1758 \text{ cm}^{-1}$ | -12.822 | $\beta$ -LUMO | 31/54/14 |
| <b>5a<sup>2+</sup></b> (S=1)                          | -10.752 | SOMO 1        | 34/51/15 |
| $\Delta E_{((S=0)-(S=1))} = 479 \text{ cm}^{-1}$      | -9.217  | $\beta$ -LUMO | 58/26/16 |
| <b>5a<sup>+</sup></b> (S=1/2)                         | -8.056  | SOMO          | 35/39/27 |
|                                                       | -7.000  | $\beta$ -LUMO | 48/20/32 |
| <b>5a</b> (S=1)                                       | -5.143  | SOMO 1        | 22/6/72  |
| $\Delta E_{((S=0)-(S=1))} = 9652 \text{ cm}^{-1}$     | -2.795  | $\beta$ -LUMO | 62/13/25 |
| <b>5a<sup>2-</sup></b> (S=0)                          |         |               |          |
| $\Delta E_{((S=1)-(S=0))} = 9528 \text{ cm}^{-1}$     | 1.781   | HOMO          | 61/14/25 |

**Table S7** Composition and energies of selected molecular orbitals of  $2^{2+}$  ( $S=1$ )

| MO             | Energy (eV) | % Composition |      |    |
|----------------|-------------|---------------|------|----|
|                |             | Ru            | acac | L  |
| $\alpha$ -spin |             |               |      |    |
| LUMO+5         | -5.921      | 8             | 83   | 9  |
| LUMO+4         | -5.941      | 7             | 74   | 17 |
| LUMO+3         | -6.028      | 3             | 15   | 82 |
| LUMO+2         | -6.040      | 2             | 8    | 90 |
| LUMO+1         | -7.219      | 8             | 3    | 90 |
| LUMO           | -7.454      | 7             | 2    | 91 |
| SOMO 1         | -10.655     | 29            | 67   | 3  |
| SOMO 2         | -10.673     | 31            | 66   | 3  |
| HOMO-2         | -10.989     | 48            | 44   | 8  |
| HOMO-3         | -11.014     | 51            | 41   | 8  |
| HOMO-4         | -11.323     | 71            | 20   | 9  |
| HOMO-5         | -11.347     | 73            | 19   | 8  |
| $\beta$ -spin  |             |               |      |    |
| LUMO+5         | -5.993      | 3             | 16   | 80 |
| LUMO+4         | -6.004      | 3             | 11   | 86 |
| LUMO+3         | -7.203      | 9             | 3    | 88 |
| LUMO+2         | -7.440      | 9             | 3    | 89 |
| LUMO+1         | -8.084      | 64            | 28   | 7  |
| LUMO           | -8.090      | 65            | 28   | 7  |
| HOMO           | -10.711     | 57            | 34   | 9  |
| HOMO-1         | -10.724     | 58            | 32   | 9  |
| HOMO-2         | -10.907     | 60            | 32   | 7  |
| HOMO-3         | -10.911     | 62            | 31   | 7  |
| HOMO-4         | -11.127     | 19            | 75   | 6  |
| HOMO-5         | -11.155     | 16            | 78   | 6  |

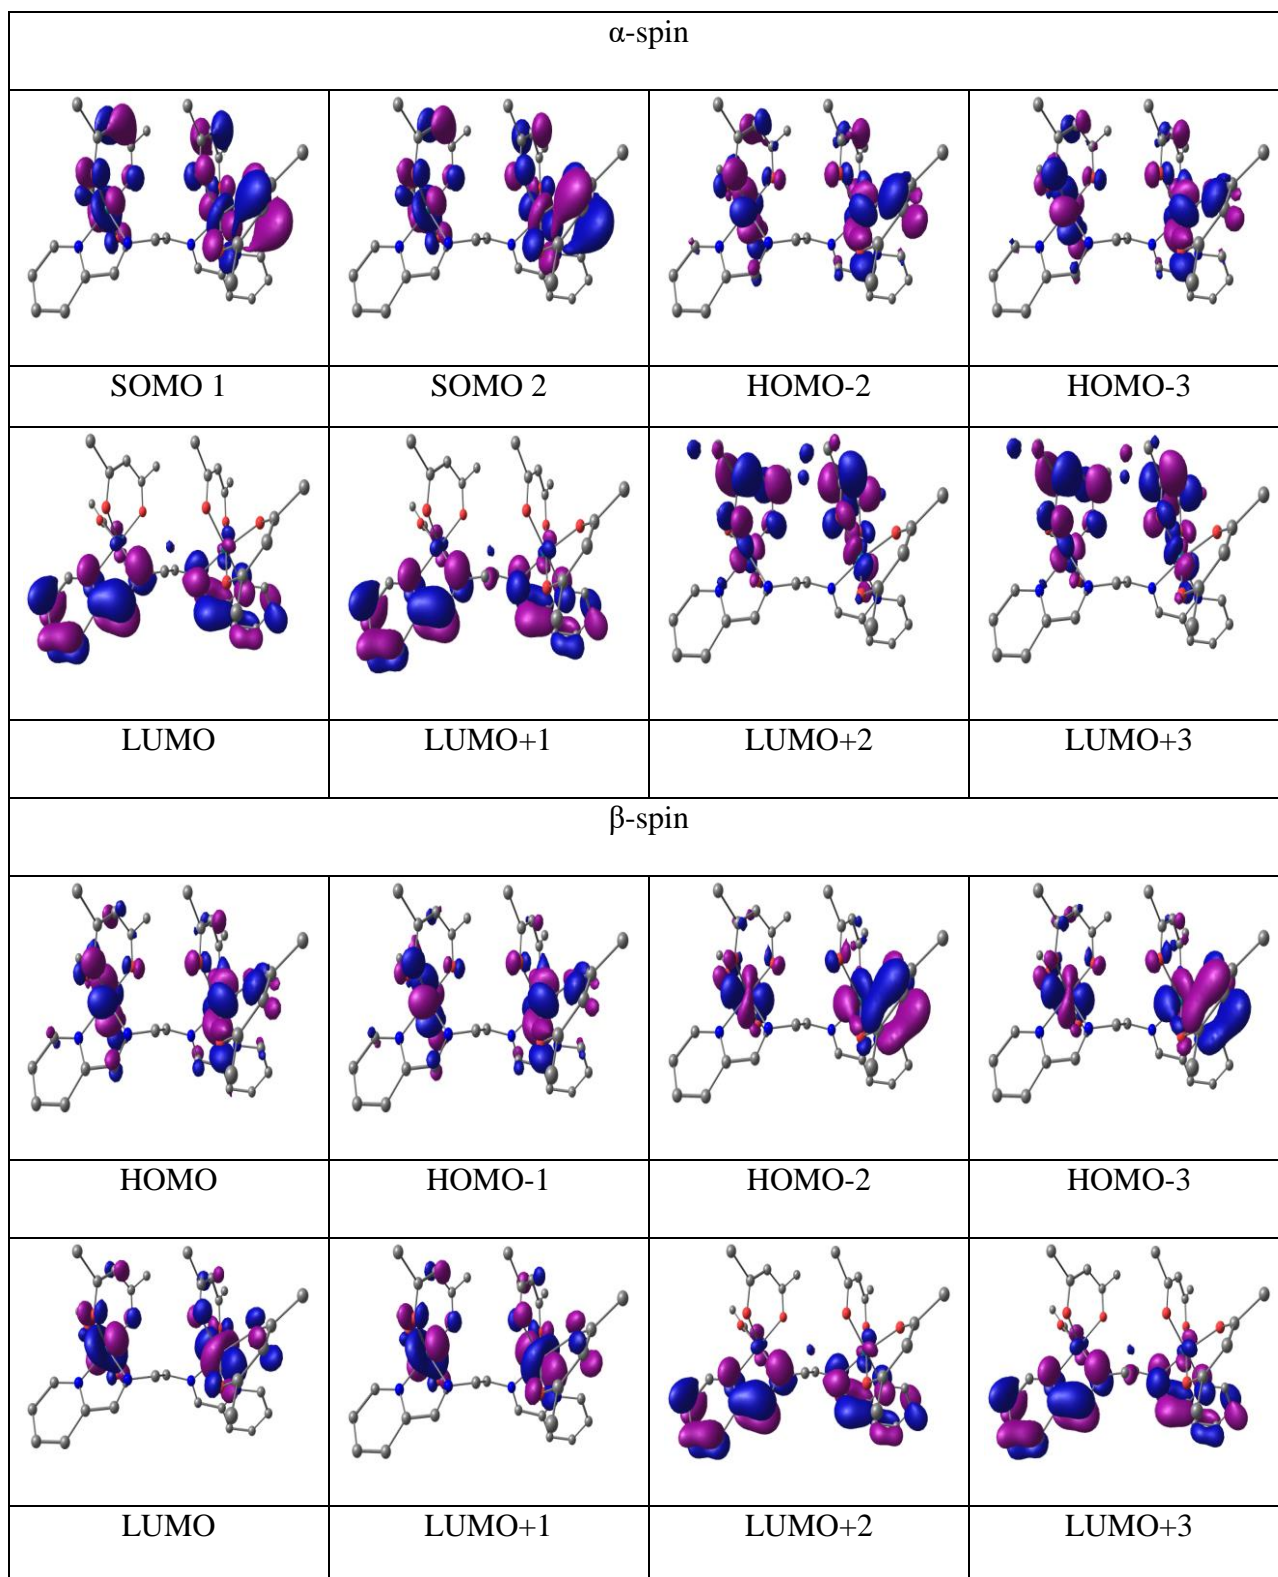

**Table S8** Composition and energies of selected molecular orbitals of **2** ( $S=0$ )

| MO     | Energy (eV) | % Composition |      |    |
|--------|-------------|---------------|------|----|
|        |             | Ru            | acac | L  |
| LUMO+5 | -0.234      | 6             | 88   | 7  |
| LUMO+4 | -0.238      | 6             | 87   | 7  |
| LUMO+3 | -0.626      | 4             | 4    | 92 |
| LUMO+2 | -0.642      | 4             | 5    | 91 |
| LUMO+1 | -1.437      | 13            | 5    | 81 |
| LUMO   | -1.665      | 14            | 4    | 81 |
| HOMO   | -3.756      | 62            | 31   | 7  |
| HOMO-1 | -3.760      | 63            | 31   | 6  |
| HOMO-2 | -4.377      | 64            | 19   | 17 |
| HOMO-3 | -4.380      | 65            | 19   | 16 |
| HOMO-4 | -4.471      | 74            | 17   | 8  |
| HOMO-5 | -4.482      | 75            | 17   | 8  |

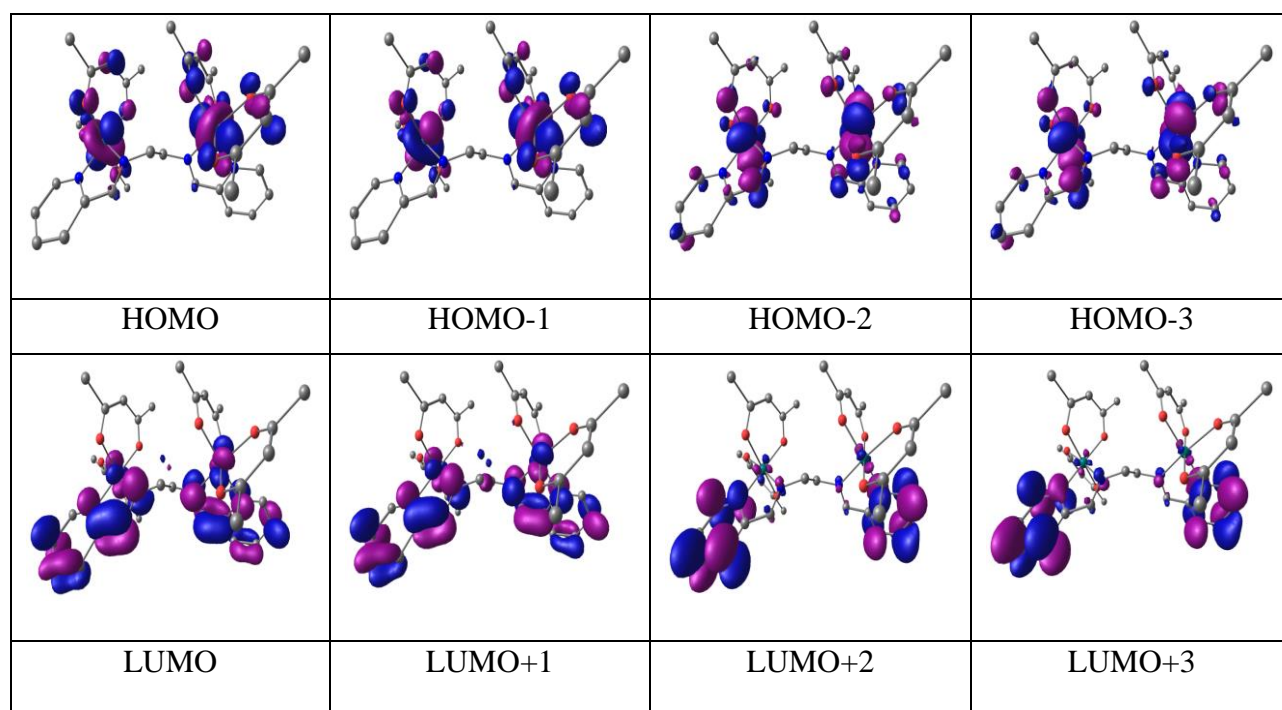

**Table S9** Composition and energies of selected molecular orbitals of  $2^{2-}$  ( $S=1$ )

| MO             | Energy (eV) | % Composition |      |    |
|----------------|-------------|---------------|------|----|
|                |             | Ru            | acac | L  |
| $\alpha$ -spin |             |               |      |    |
| LUMO+5         | 5.065       | 7             | 2    | 91 |
| LUMO+4         | 5.040       | 8             | 3    | 89 |
| LUMO+3         | 4.667       | 8             | 85   | 5  |
| LUMO+2         | 4.650       | 6             | 88   | 3  |
| LUMO+1         | 4.468       | 5             | 91   | 4  |
| LUMO           | 4.467       | 5             | 92   | 4  |
| SOMO 1         | 2.988       | 12            | 5    | 83 |
| SOMO 2         | 2.762       | 12            | 5    | 84 |
| HOMO-2         | 1.322       | 74            | 19   | 7  |
| HOMO-3         | 1.314       | 75            | 19   | 6  |
| HOMO-4         | 0.908       | 79            | 15   | 7  |
| HOMO-5         | 0.869       | 78            | 15   | 7  |
| $\beta$ -spin  |             |               |      |    |
| LUMO+5         | 4.889       | 13            | 13   | 73 |
| LUMO+4         | 4.786       | 12            | 53   | 34 |
| LUMO+3         | 4.668       | 6             | 87   | 5  |
| LUMO+2         | 4.604       | 8             | 68   | 23 |
| LUMO+1         | 4.447       | 2             | 89   | 8  |
| LUMO           | 4.401       | 2             | 72   | 25 |
| HOMO           | 1.373       | 73            | 18   | 9  |
| HOMO-1         | 1.361       | 74            | 18   | 8  |
| HOMO-2         | 1.091       | 74            | 15   | 11 |
| HOMO-3         | 1.090       | 73            | 15   | 12 |
| HOMO-4         | 0.944       | 78            | 15   | 7  |
| HOMO-5         | 0.907       | 77            | 15   | 7  |



| $\alpha$ -spin                                                                      |                                                                                     |                                                                                      |                                                                                       |
|-------------------------------------------------------------------------------------|-------------------------------------------------------------------------------------|--------------------------------------------------------------------------------------|---------------------------------------------------------------------------------------|
| 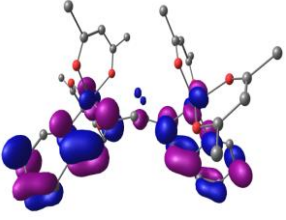   |    |    |    |
| SOMO 1                                                                              | SOMO 2                                                                              | HOMO-2                                                                               | HOMO-3                                                                                |
|    |    |    |    |
| LUMO                                                                                | LUMO+1                                                                              | LUMO+2                                                                               | LUMO+3                                                                                |
| $\beta$ -spin                                                                       |                                                                                     |                                                                                      |                                                                                       |
|  |  |  |  |
| HOMO                                                                                | HOMO-1                                                                              | HOMO-2                                                                               | HOMO-3                                                                                |
|  |  |  |  |
| LUMO                                                                                | LUMO+1                                                                              | LUMO+2                                                                               | LUMO+3                                                                                |

**Table S10** Composition and energies of selected molecular orbitals of **2a<sup>4+</sup>** (*S*=1)

| MO             | Energy (eV) | % Composition |      |    |
|----------------|-------------|---------------|------|----|
|                |             | Ru            | acac | L  |
| $\alpha$ -spin |             |               |      |    |
| LUMO+5         | -12.226     | 30            | 58   | 13 |
| LUMO+4         | -12.277     | 6             | 90   | 4  |
| LUMO+3         | -12.574     | 49            | 43   | 8  |
| LUMO+2         | -12.633     | 53            | 38   | 8  |
| LUMO+1         | -15.513     | 31            | 6    | 63 |
| LUMO           | -15.861     | 37            | 53   | 10 |
| SOMO 1         | -17.303     | 3             | 10   | 86 |
| SOMO 2         | -17.356     | 1             | 1    | 98 |
| HOMO-2         | -17.441     | 22            | 48   | 30 |
| HOMO-3         | -17.551     | 20            | 61   | 19 |
| HOMO-4         | -17.670     | 38            | 21   | 41 |
| HOMO-5         | -17.729     | 17            | 60   | 23 |
| $\beta$ -spin  |             |               |      |    |
| LUMO+5         | -12.406     | 43            | 49   | 7  |
| LUMO+4         | -12.433     | 24            | 70   | 6  |
| LUMO+3         | -15.233     | 43            | 10   | 47 |
| LUMO+2         | -15.451     | 42            | 51   | 7  |
| LUMO+1         | -15.588     | 53            | 39   | 8  |
| LUMO           | -15.650     | 45            | 47   | 8  |
| HOMO           | -17.103     | 23            | 67   | 10 |
| HOMO-1         | -17.240     | 5             | 6    | 89 |
| HOMO-2         | -17.324     | 35            | 32   | 33 |
| HOMO-3         | -17.412     | 17            | 18   | 66 |
| HOMO-4         | -17.487     | 30            | 23   | 46 |
| HOMO-5         | -17.650     | 13            | 5    | 82 |

| $\alpha$ -spin                                                                      |                                                                                     |                                                                                      |                                                                                       |
|-------------------------------------------------------------------------------------|-------------------------------------------------------------------------------------|--------------------------------------------------------------------------------------|---------------------------------------------------------------------------------------|
| 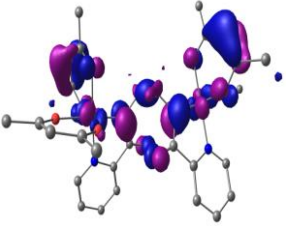   |    |    |    |
| SOMO 1                                                                              | SOMO 2                                                                              | HOMO-2                                                                               | HOMO-3                                                                                |
|    |    |    |    |
| LUMO                                                                                | LUMO+1                                                                              | LUMO+2                                                                               | LUMO+3                                                                                |
| $\beta$ -spin                                                                       |                                                                                     |                                                                                      |                                                                                       |
|  |  |  |  |
| HOMO                                                                                | HOMO-1                                                                              | HOMO-2                                                                               | HOMO-3                                                                                |
|  |  |  |  |
| LUMO                                                                                | LUMO+1                                                                              | LUMO+2                                                                               | LUMO+3                                                                                |

**Table S11** Composition and energies of selected molecular orbitals of **2a<sup>3+</sup>** (*S*=3/2)

| MO             | Energy (eV) | % Composition |      |    |
|----------------|-------------|---------------|------|----|
|                |             | Ru            | acac | L  |
| $\alpha$ -spin |             |               |      |    |
| LUMO+5         | -9.410      | 33            | 47   | 20 |
| LUMO+4         | -9.437      | 9             | 85   | 7  |
| LUMO+3         | -9.451      | 12            | 78   | 10 |
| LUMO+2         | -9.803      | 55            | 37   | 8  |
| LUMO+1         | -9.807      | 54            | 37   | 9  |
| LUMO           | -13.498     | 25            | 68   | 7  |
| SOMO 1         | -13.971     | 26            | 59   | 15 |
| SOMO 2         | -14.525     | 14            | 38   | 48 |
| SOMO 3         | -14.590     | 12            | 69   | 19 |
| HOMO-3         | -14.620     | 8             | 83   | 9  |
| HOMO-4         | -14.882     | 14            | 17   | 70 |
| HOMO-5         | -14.910     | 6             | 2    | 91 |
| $\beta$ -spin  |             |               |      |    |
| LUMO+5         | -9.511      | 14            | 81   | 5  |
| LUMO+4         | -9.521      | 20            | 73   | 7  |
| LUMO+3         | -11.930     | 43            | 9    | 48 |
| LUMO+2         | -12.140     | 55            | 16   | 29 |
| LUMO+1         | -12.518     | 60            | 32   | 8  |
| LUMO           | -12.588     | 61            | 27   | 12 |
| HOMO           | -14.438     | 33            | 51   | 16 |
| HOMO-1         | -14.477     | 28            | 61   | 11 |
| HOMO-2         | -14.615     | 19            | 57   | 24 |
| HOMO-3         | -14.759     | 18            | 7    | 75 |
| HOMO-4         | -14.768     | 8             | 16   | 76 |
| HOMO-5         | -14.780     | 14            | 17   | 69 |

| $\alpha$ -spin                                                                      |                                                                                     |                                                                                      |                                                                                       |
|-------------------------------------------------------------------------------------|-------------------------------------------------------------------------------------|--------------------------------------------------------------------------------------|---------------------------------------------------------------------------------------|
| 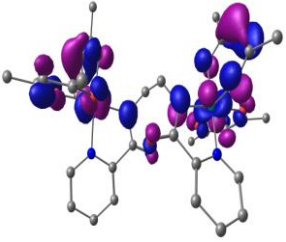   |    |    |    |
| SOMO 1                                                                              | SOMO 2                                                                              | SOMO 3                                                                               | HOMO-3                                                                                |
|    |    |    |    |
| LUMO                                                                                | LUMO+1                                                                              | LUMO+2                                                                               | LUMO+3                                                                                |
| $\beta$ -spin                                                                       |                                                                                     |                                                                                      |                                                                                       |
|  |  |  |  |
| HOMO                                                                                | HOMO-1                                                                              | HOMO-2                                                                               | HOMO-3                                                                                |
|  |  |  |  |
| LUMO                                                                                | LUMO+1                                                                              | LUMO+2                                                                               | LUMO+3                                                                                |

**Table S12** Composition and energies of selected molecular orbitals of **2a<sup>2+</sup>** (*S*=1)

| MO             | Energy (eV) | % Composition |      |    |
|----------------|-------------|---------------|------|----|
|                |             | Ru            | acac | L  |
| $\alpha$ -spin |             |               |      |    |
| LUMO+5         | -6.570      | 19            | 27   | 54 |
| LUMO+4         | -6.653      | 23            | 40   | 37 |
| LUMO+3         | -6.684      | 28            | 52   | 20 |
| LUMO+2         | -6.826      | 6             | 4    | 90 |
| LUMO+1         | -7.037      | 51            | 37   | 11 |
| LUMO           | -9.719      | 52            | 23   | 25 |
| SOMO 1         | -11.267     | 30            | 53   | 18 |
| SOMO 2         | -11.462     | 22            | 67   | 11 |
| HOMO-2         | -11.603     | 9             | 75   | 17 |
| HOMO-3         | -11.853     | 10            | 83   | 7  |
| HOMO-4         | -11.942     | 27            | 31   | 42 |
| HOMO-5         | -11.987     | 54            | 26   | 20 |
| $\beta$ -spin  |             |               |      |    |
| LUMO+5         | -6.627      | 30            | 45   | 24 |
| LUMO+4         | -6.655      | 15            | 27   | 58 |
| LUMO+3         | -6.721      | 16            | 35   | 49 |
| LUMO+2         | -9.073      | 54            | 15   | 31 |
| LUMO+1         | -9.619      | 60            | 25   | 16 |
| LUMO           | -9.733      | 57            | 24   | 19 |
| HOMO           | -11.271     | 31            | 55   | 14 |
| HOMO-1         | -11.443     | 10            | 76   | 15 |
| HOMO-2         | -11.648     | 12            | 75   | 13 |
| HOMO-3         | -11.728     | 25            | 66   | 8  |
| HOMO-4         | -11.969     | 56            | 27   | 17 |
| HOMO-5         | -12.039     | 30            | 11   | 59 |

| $\alpha$ -spin                                                                      |                                                                                     |                                                                                      |                                                                                       |
|-------------------------------------------------------------------------------------|-------------------------------------------------------------------------------------|--------------------------------------------------------------------------------------|---------------------------------------------------------------------------------------|
| 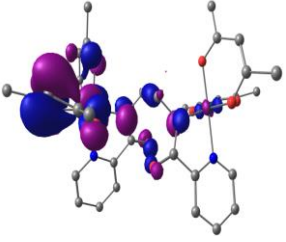   |    |    |    |
| SOMO 1                                                                              | SOMO 2                                                                              | HOMO-2                                                                               | HOMO-3                                                                                |
|    |    |    |    |
| LUMO                                                                                | LUMO+1                                                                              | LUMO+2                                                                               | LUMO+3                                                                                |
| $\beta$ -spin                                                                       |                                                                                     |                                                                                      |                                                                                       |
|  |  |  |  |
| HOMO                                                                                | HOMO-1                                                                              | HOMO-2                                                                               | HOMO-3                                                                                |
|  |  |  |  |
| LUMO                                                                                | LUMO+1                                                                              | LUMO+2                                                                               | LUMO+3                                                                                |

**Table S13** Composition and energies of selected molecular orbitals of **2a<sup>+</sup>** ( $S=1/2$ )

| MO             | Energy (eV) | % Composition |      |    |
|----------------|-------------|---------------|------|----|
|                |             | Ru            | acac | L  |
| $\alpha$ -spin |             |               |      |    |
| LUMO+5         | -3.576      | 7             | 88   | 5  |
| LUMO+4         | -3.654      | 5             | 89   | 6  |
| LUMO+3         | -3.799      | 12            | 81   | 7  |
| LUMO+2         | -4.059      | 3             | 5    | 92 |
| LUMO+1         | -4.154      | 3             | 2    | 95 |
| LUMO           | -5.855      | 67            | 19   | 14 |
| SOMO           | -8.230      | 43            | 37   | 19 |
| HOMO-1         | -8.424      | 37            | 40   | 22 |
| HOMO-2         | -8.595      | 35            | 57   | 8  |
| HOMO-3         | -8.737      | 33            | 57   | 11 |
| HOMO-4         | -8.809      | 36            | 56   | 15 |
| HOMO-5         | -8.919      | 22            | 50   | 22 |
| $\beta$ -spin  |             |               |      |    |
| LUMO+5         | -3.649      | 12            | 80   | 9  |
| LUMO+4         | -3.729      | 7             | 85   | 8  |
| LUMO+3         | -3.993      | 4             | 8    | 88 |
| LUMO+2         | -4.056      | 3             | 3    | 94 |
| LUMO+1         | -5.737      | 62            | 15   | 22 |
| LUMO           | -7.075      | 43            | 17   | 40 |
| HOMO           | -7.830      | 53            | 22   | 25 |
| HOMO-1         | -8.377      | 32            | 64   | 4  |
| HOMO-2         | 8.568       | 26            | 62   | 12 |
| HOMO-3         | -8.697      | 26            | 62   | 12 |
| HOMO-4         | -8.843      | 44            | 39   | 17 |
| HOMO-5         | -9.025      | 54            | 30   | 16 |



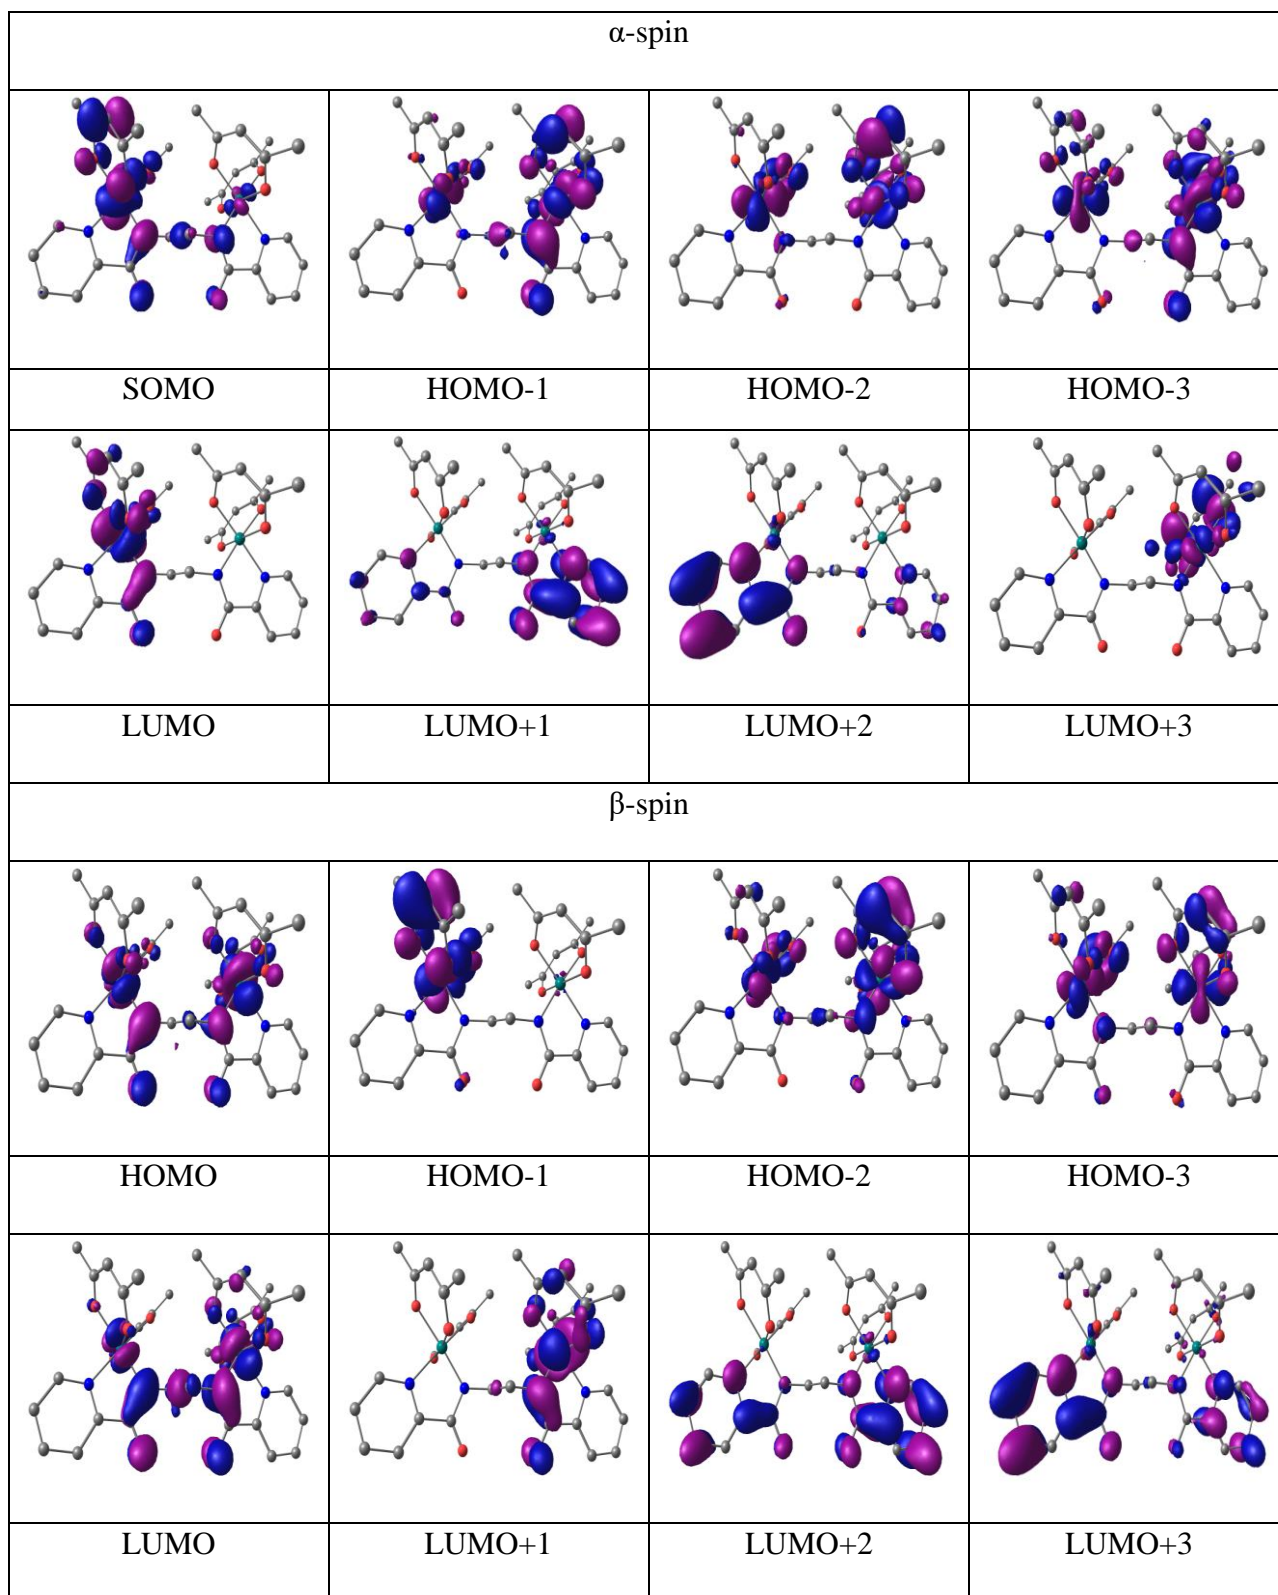

**Table S14** Composition and energies of selected molecular orbitals of **2a** ( $S=1$ )

| MO             | Energy (eV) | % Composition |      |    |
|----------------|-------------|---------------|------|----|
|                |             | Ru            | acac | L  |
| $\alpha$ -spin |             |               |      |    |
| LUMO+5         | -0.622      | 6             | 79   | 15 |
| LUMO+4         | -0.693      | 3             | 91   | 6  |
| LUMO+3         | -0.753      | 6             | 88   | 6  |
| LUMO+2         | -0.817      | 3             | 94   | 3  |
| LUMO+1         | -1.143      | 5             | 5    | 90 |
| LUMO           | -1.384      | 5             | 2    | 93 |
| SOMO 1         | -4.738      | 30            | 18   | 52 |
| SOMO 2         | -4.974      | 34            | 41   | 25 |
| HOMO-2         | -5.070      | 54            | 39   | 7  |
| HOMO-3         | -5.158      | 49            | 45   | 6  |
| HOMO-4         | -5.382      | 44            | 31   | 24 |
| HOMO-5         | -5.596      | 34            | 9    | 57 |
| $\beta$ -spin  |             |               |      |    |
| LUMO+5         | -0.701      | 6             | 86   | 6  |
| LUMO+4         | -0.755      | 8             | 91   | 5  |
| LUMO+3         | -1.121      | 5             | 8    | 88 |
| LUMO+2         | -1.369      | 5             | 3    | 91 |
| LUMO+1         | -2.417      | 58            | 21   | 21 |
| LUMO           | -2.469      | 60            | 26   | 14 |
| HOMO           | -4.727      | 46            | 26   | 28 |
| HOMO-1         | -4.781      | 49            | 40   | 11 |
| HOMO-2         | -5.018      | 43            | 41   | 17 |
| HOMO-3         | -5.329      | 62            | 23   | 15 |
| HOMO-4         | -5.426      | 44            | 20   | 36 |
| HOMO-5         | -5.490      | 16            | 25   | 59 |

| $\alpha$ -spin                                                                      |                                                                                     |                                                                                      |                                                                                       |
|-------------------------------------------------------------------------------------|-------------------------------------------------------------------------------------|--------------------------------------------------------------------------------------|---------------------------------------------------------------------------------------|
| 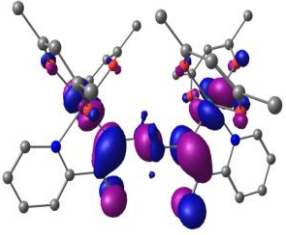   |    |    |    |
| SOMO 1                                                                              | SOMO 2                                                                              | HOMO-2                                                                               | HOMO-3                                                                                |
|    |    |    |    |
| LUMO                                                                                | LUMO+1                                                                              | LUMO+2                                                                               | LUMO+3                                                                                |
| $\beta$ -spin                                                                       |                                                                                     |                                                                                      |                                                                                       |
|  |  |  |  |
| HOMO                                                                                | HOMO-1                                                                              | HOMO-2                                                                               | HOMO-3                                                                                |
|  |  |  |  |
| LUMO                                                                                | LUMO+1                                                                              | LUMO+2                                                                               | LUMO+3                                                                                |

**Table S15** Composition and energies of selected molecular orbitals of **2a<sup>2-</sup>** (*S*=0)

| MO     | Energy (eV) | % Composition |      |    |
|--------|-------------|---------------|------|----|
|        |             | Ru            | acac | L  |
| LUMO+5 | 4.544       | 7             | 80   | 13 |
| LUMO+4 | 4.523       | 6             | 65   | 29 |
| LUMO+3 | 4.498       | 4             | 26   | 69 |
| LUMO+2 | 4.455       | 3             | 12   | 85 |
| LUMO+1 | 4.078       | 6             | 14   | 80 |
| LUMO   | 4.051       | 7             | 9    | 84 |
| HOMO   | 1.995       | 52            | 11   | 37 |
| HOMO-1 | 1.898       | 62            | 14   | 24 |
| HOMO-2 | 1.159       | 70            | 18   | 11 |
| HOMO-3 | 1.121       | 72            | 18   | 10 |
| HOMO-4 | 0.975       | 76            | 15   | 9  |
| HOMO-5 | 0.919       | 76            | 15   | 9  |

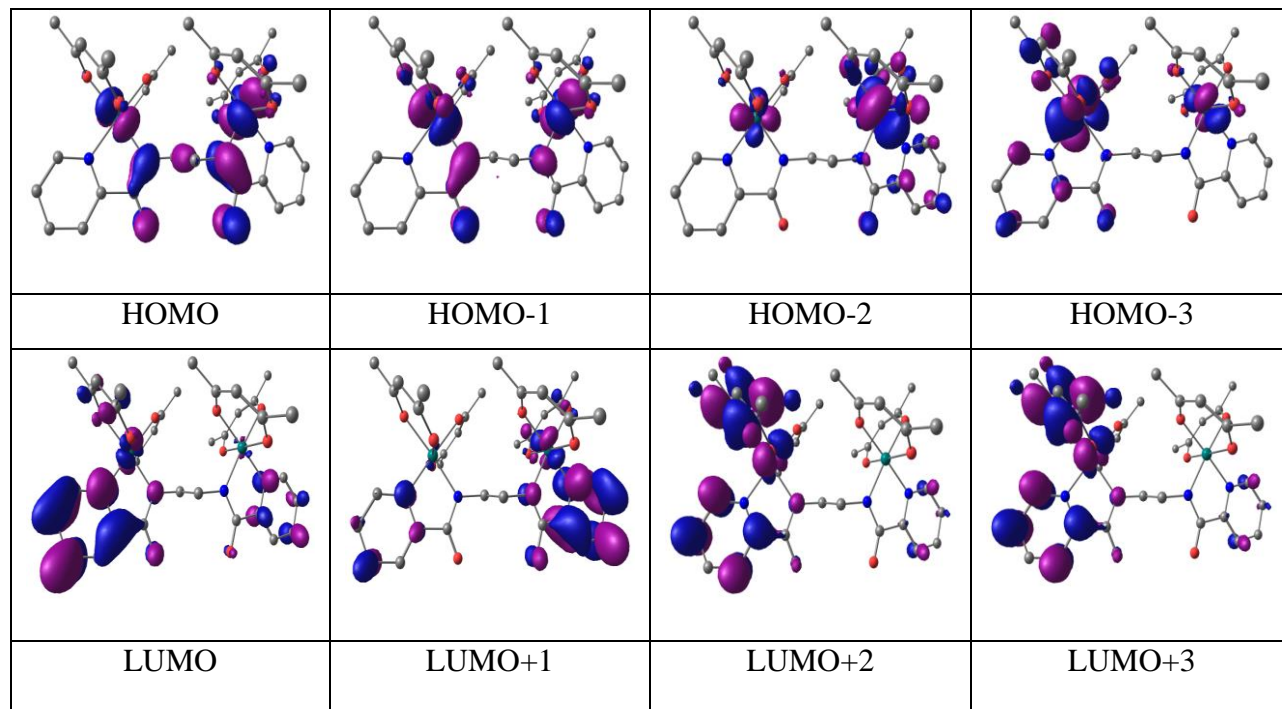

**Table S16** Composition and energies of selected molecular orbitals of  $\mathbf{3}^{2+}$  ( $S=1$ )

| MO             | Energy (eV) | % Composition |      |    |
|----------------|-------------|---------------|------|----|
|                |             | Ru            | acac | L  |
| $\alpha$ -spin |             |               |      |    |
| LUMO+5         | -5.941      | 41            | 52   | 8  |
| LUMO+4         | -5.986      | 50            | 39   | 11 |
| LUMO+3         | -6.022      | 3             | 2    | 95 |
| LUMO+2         | -6.138      | 2             | 1    | 96 |
| LUMO+1         | -7.427      | 7             | 2    | 91 |
| LUMO           | -7.622      | 7             | 2    | 91 |
| SOMO 1         | -10.698     | 18            | 80   | 2  |
| SOMO 2         | -10.808     | 17            | 80   | 3  |
| HOMO-2         | -10.911     | 21            | 75   | 4  |
| HOMO-3         | -10.924     | 19            | 77   | 4  |
| HOMO-4         | -11.422     | 51            | 38   | 11 |
| HOMO-5         | -11.546     | 73            | 18   | 8  |
| $\beta$ -spin  |             |               |      |    |
| LUMO+5         | -5.984      | 3             | 1    | 95 |
| LUMO+4         | -6.107      | 3             | 2    | 95 |
| LUMO+3         | -7.407      | 9             | 2    | 89 |
| LUMO+2         | -7.596      | 9             | 2    | 88 |
| LUMO+1         | -8.404      | 68            | 25   | 6  |
| LUMO           | -8.572      | 69            | 23   | 8  |
| HOMO           | -10.650     | 25            | 70   | 5  |
| HOMO-1         | -10.684     | 25            | 70   | 5  |
| HOMO-2         | -10.905     | 41            | 54   | 5  |
| HOMO-3         | -10.955     | 37            | 57   | 6  |
| HOMO-4         | -11.131     | 51            | 39   | 10 |
| HOMO-5         | -11.291     | 52            | 37   | 10 |

| $\alpha$ -spin                                                                      |                                                                                     |                                                                                      |                                                                                       |
|-------------------------------------------------------------------------------------|-------------------------------------------------------------------------------------|--------------------------------------------------------------------------------------|---------------------------------------------------------------------------------------|
| 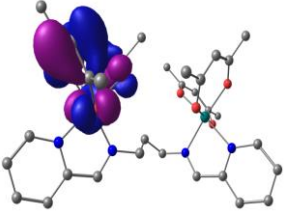   |    |    |    |
| SOMO                                                                                | HOMO-1                                                                              | HOMO-2                                                                               | HOMO-3                                                                                |
|    |    |    |    |
| LUMO                                                                                | LUMO+1                                                                              | LUMO+2                                                                               | LUMO+3                                                                                |
| $\beta$ -spin                                                                       |                                                                                     |                                                                                      |                                                                                       |
|  |  |  |  |
| HOMO                                                                                | HOMO-1                                                                              | HOMO-2                                                                               | HOMO-3                                                                                |
|  |  |  |  |
| LUMO                                                                                | LUMO+1                                                                              | LUMO+2                                                                               | LUMO+3                                                                                |

**Table S17** Composition and energies of selected molecular orbitals of  $3^+$  ( $S=1/2$ )

| MO             | Energy (eV) | % Composition |      |    |
|----------------|-------------|---------------|------|----|
|                |             | Ru            | acac | L  |
| $\alpha$ -spin |             |               |      |    |
| LUMO+5         | -3.147      | 7             | 89   | 2  |
| LUMO+4         | -3.167      | 4             | 94   | 2  |
| LUMO+3         | -3.297      | 3             | 1    | 96 |
| LUMO+2         | -3.597      | 2             | 1    | 97 |
| LUMO+1         | -4.543      | 11            | 3    | 86 |
| LUMO           | -4.847      | 9             | 2    | 88 |
| SOMO           | -7.469      | 47            | 48   | 5  |
| HOMO-1         | -7.609      | 52            | 37   | 10 |
| HOMO-2         | -7.841      | 77            | 15   | 8  |
| HOMO-3         | -7.893      | 36            | 61   | 3  |
| HOMO-4         | -8.123      | 47            | 45   | 8  |
| HOMO-5         | -8.266      | 26            | 68   | 6  |
| $\beta$ -spin  |             |               |      |    |
| LUMO+5         | -3.145      | 3             | 95   | 2  |
| LUMO+4         | -3.293      | 4             | 2    | 95 |
| LUMO+3         | -3.580      | 3             | 1    | 95 |
| LUMO+2         | -4.532      | 13            | 3    | 84 |
| LUMO+1         | 4.834       | 11            | 3    | 86 |
| LUMO           | -6.152      | 67            | 26   | 7  |
| HOMO           | -6.584      | 68            | 26   | 7  |
| HOMO-1         | -7.473      | 54            | 34   | 12 |
| HOMO-2         | -7.665      | 69            | 23   | 8  |
| HOMO-3         | -7.936      | 51            | 39   | 10 |
| HOMO-4         | -8.127      | 64            | 29   | 6  |
| HOMO-5         | -8.153      | 22            | 72   | 6  |

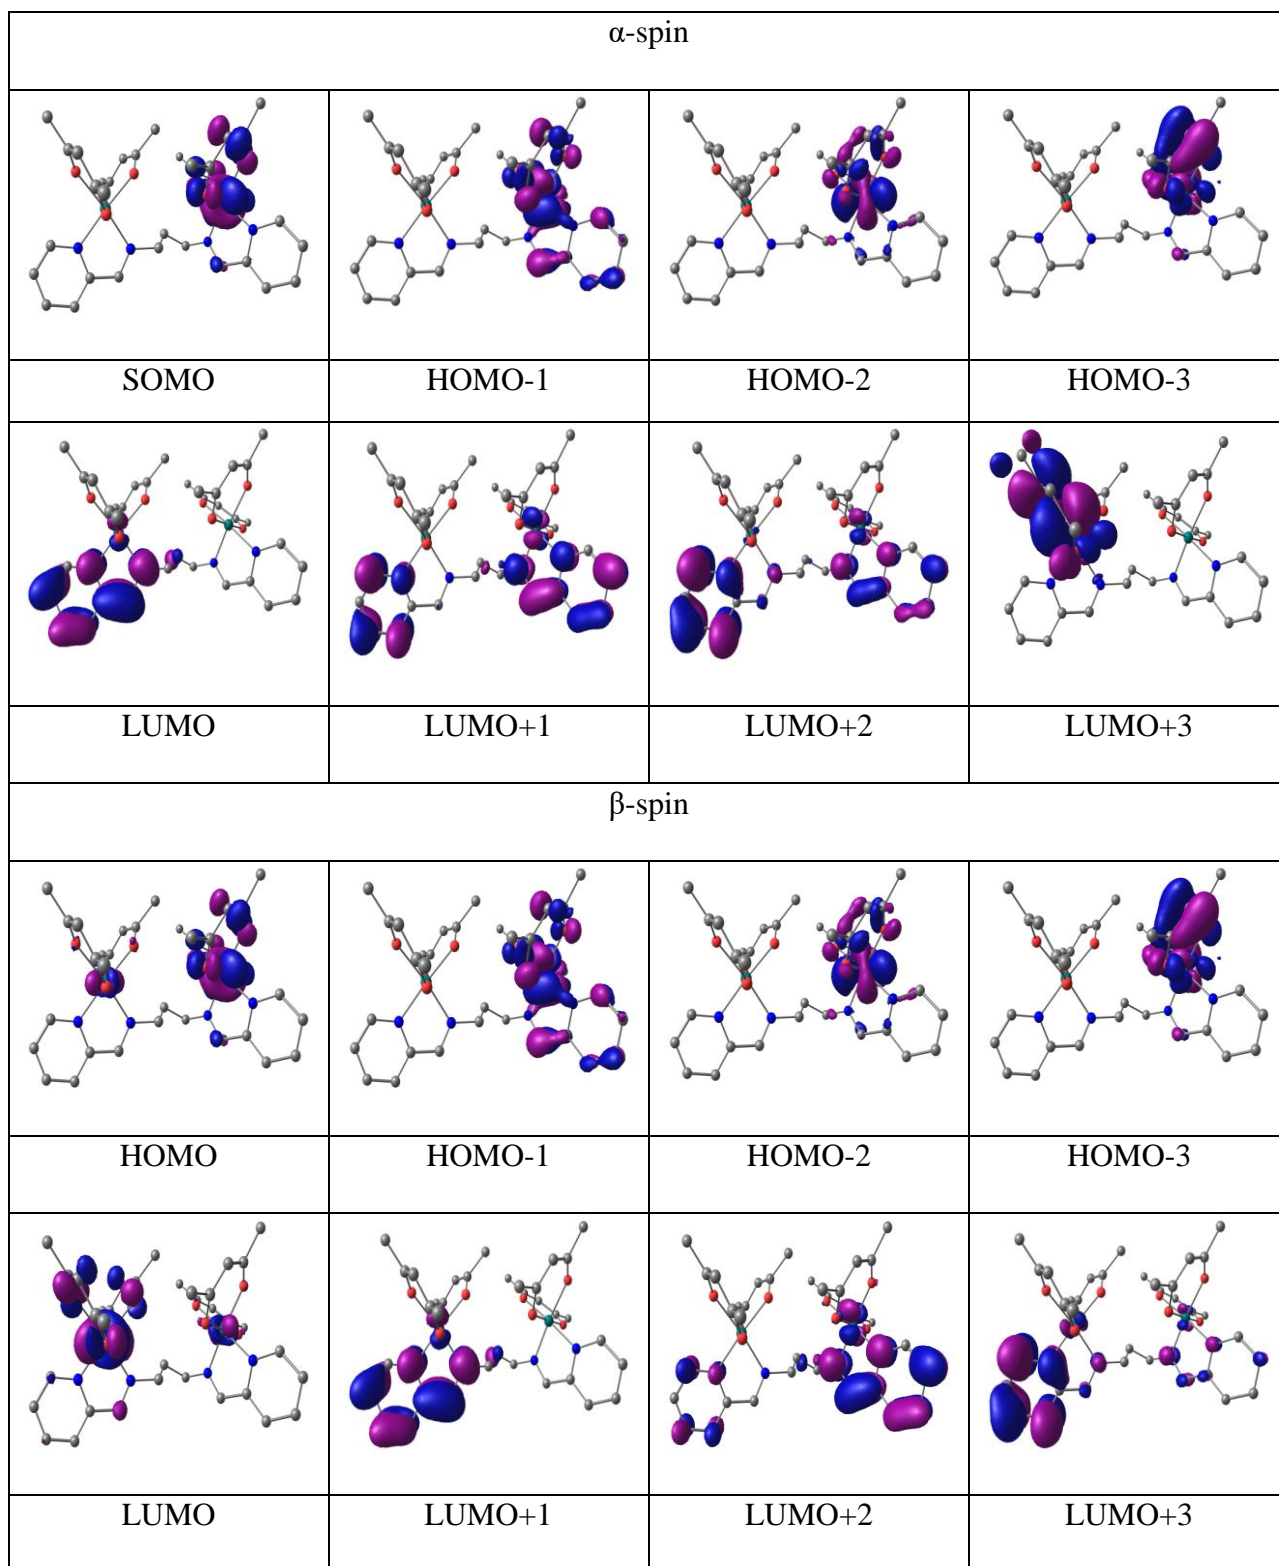



**Table S18** Composition and energies of selected molecular orbitals of **3** ( $S=0$ )

| MO     | Energy (eV) | % Composition |      |    |
|--------|-------------|---------------|------|----|
|        |             | Ru            | acac | L  |
| LUMO+5 | -0.324      | 5             | 91   | 4  |
| LUMO+4 | -0.361      | 4             | 93   | 3  |
| LUMO+3 | -0.702      | 4             | 1    | 95 |
| LUMO+2 | -0.815      | 4             | 1    | 95 |
| LUMO+1 | -1.713      | 14            | 4    | 82 |
| LUMO   | -1.893      | 14            | 3    | 83 |
| HOMO   | -4.034      | 63            | 30   | 8  |
| HOMO-1 | -4.251      | 65            | 30   | 5  |
| HOMO-2 | -4.559      | 63            | 21   | 15 |
| HOMO-3 | -4.675      | 67            | 20   | 13 |
| HOMO-4 | -4.736      | 79            | 15   | 6  |
| HOMO-5 | -4.792      | 73            | 16   | 12 |

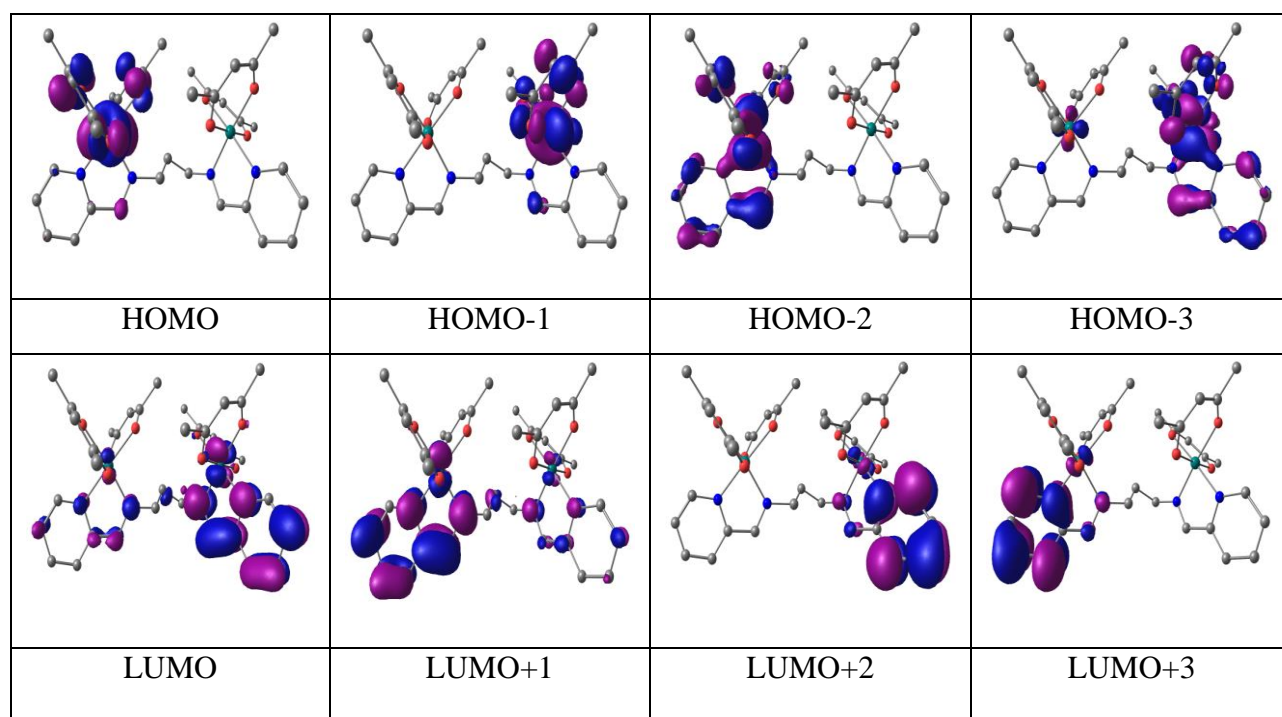

**Table S19** Composition and energies of selected molecular orbitals of  $\mathbf{3}^-$  ( $S=1/2$ )

| MO             | Energy (eV) | % Composition |      |    |
|----------------|-------------|---------------|------|----|
|                |             | Ru            | acac | L  |
| $\alpha$ -spin |             |               |      |    |
| LUMO+5         | 2.278       | 5             | 84   | 10 |
| LUMO+4         | 2.141       | 3             | 52   | 45 |
| LUMO+3         | 2.111       | 6             | 58   | 35 |
| LUMO+2         | 2.087       | 5             | 66   | 29 |
| LUMO+1         | 1.985       | 3             | 33   | 64 |
| LUMO           | 0.728       | 14            | 4    | 82 |
| SOMO 1         | 0.215       | 14            | 4    | 82 |
| SOMO 2         | -1.471      | 72            | 21   | 7  |
| HOMO-2         | -1.479      | 70            | 24   | 6  |
| HOMO-3         | -1.863      | 75            | 16   | 9  |
| HOMO-4         | -1.884      | 67            | 18   | 15 |
| HOMO-5         | -1.970      | 78            | 15   | 8  |
| $\beta$ -spin  |             |               |      |    |
| LUMO+5         | 2.196       | 3             | 38   | 59 |
| LUMO+4         | 2.140       | 7             | 83   | 11 |
| LUMO+3         | 2.119       | 6             | 43   | 51 |
| LUMO+2         | 2.025       | 3             | 56   | 41 |
| LUMO+1         | 1.467       | 11            | 7    | 82 |
| LUMO           | 1.306       | 11            | 6    | 83 |
| HOMO           | -1.444      | 72            | 20   | 8  |
| HOMO-1         | -1.459      | 70            | 23   | 6  |
| HOMO-2         | -1.710      | 68            | 18   | 14 |
| HOMO-3         | -1.831      | 70            | 16   | 13 |
| HOMO-4         | -1.847      | 76            | 16   | 8  |
| HOMO-5         | -1.951      | 78            | 15   | 7  |

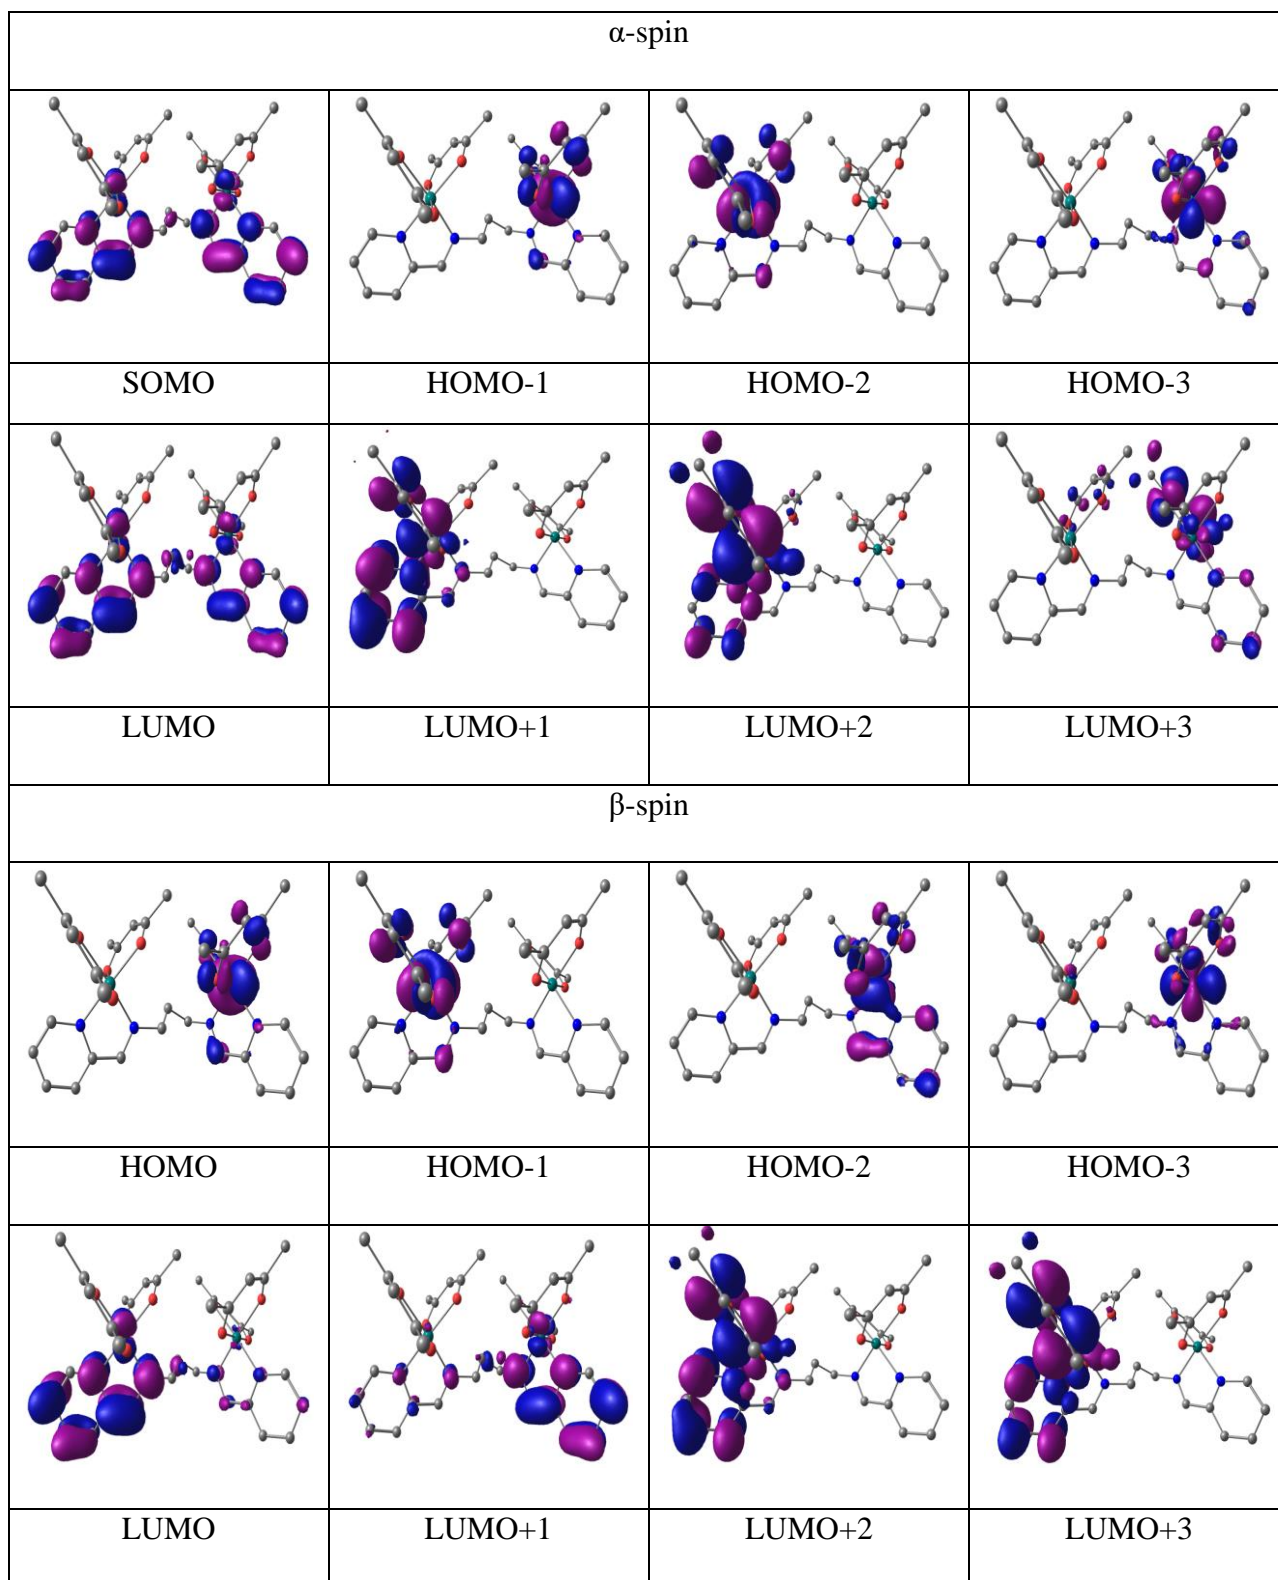

**Table S20** Composition and energies of selected molecular orbitals of  $\mathbf{3}^{2-}$  ( $S=1$ )

| MO             | Energy (eV) | % Composition |      |    |
|----------------|-------------|---------------|------|----|
|                |             | Ru            | acac | L  |
| $\alpha$ -spin |             |               |      |    |
| LUMO+5         | 5.037       | 8             | 3    | 89 |
| LUMO+4         | 4.949       | 9             | 5    | 86 |
| LUMO+3         | 4.801       | 6             | 91   | 3  |
| LUMO+2         | 4.640       | 6             | 88   | 6  |
| LUMO+1         | 4.511       | 4             | 92   | 3  |
| LUMO           | 4.457       | 6             | 92   | 3  |
| SOMO 1         | 2.708       | 13            | 4    | 83 |
| SOMO 2         | 2.490       | 13            | 4    | 83 |
| HOMO-2         | 1.318       | 75            | 19   | 6  |
| HOMO-3         | 1.148       | 76            | 17   | 7  |
| HOMO-4         | 0.888       | 79            | 15   | 6  |
| HOMO-5         | 0.790       | 75            | 15   | 10 |
| $\beta$ -spin  |             |               |      |    |
| LUMO+5         | 4.856       | 8             | 80   | 11 |
| LUMO+4         | 4.671       | 6             | 80   | 13 |
| LUMO+3         | 4.624       | 9             | 61   | 30 |
| LUMO+2         | 4.540       | 10            | 71   | 19 |
| LUMO+1         | 4.436       | 3             | 65   | 32 |
| LUMO           | 4.270       | 5             | 34   | 60 |
| HOMO           | 1.376       | 74            | 18   | 9  |
| HOMO-1         | 1.217       | 74            | 16   | 10 |
| HOMO-2         | 1.091       | 74            | 15   | 12 |
| HOMO-3         | 1.000       | 72            | 16   | 12 |
| HOMO-4         | 0.930       | 78            | 15   | 7  |
| HOMO-5         | 0.831       | 77            | 15   | 7  |

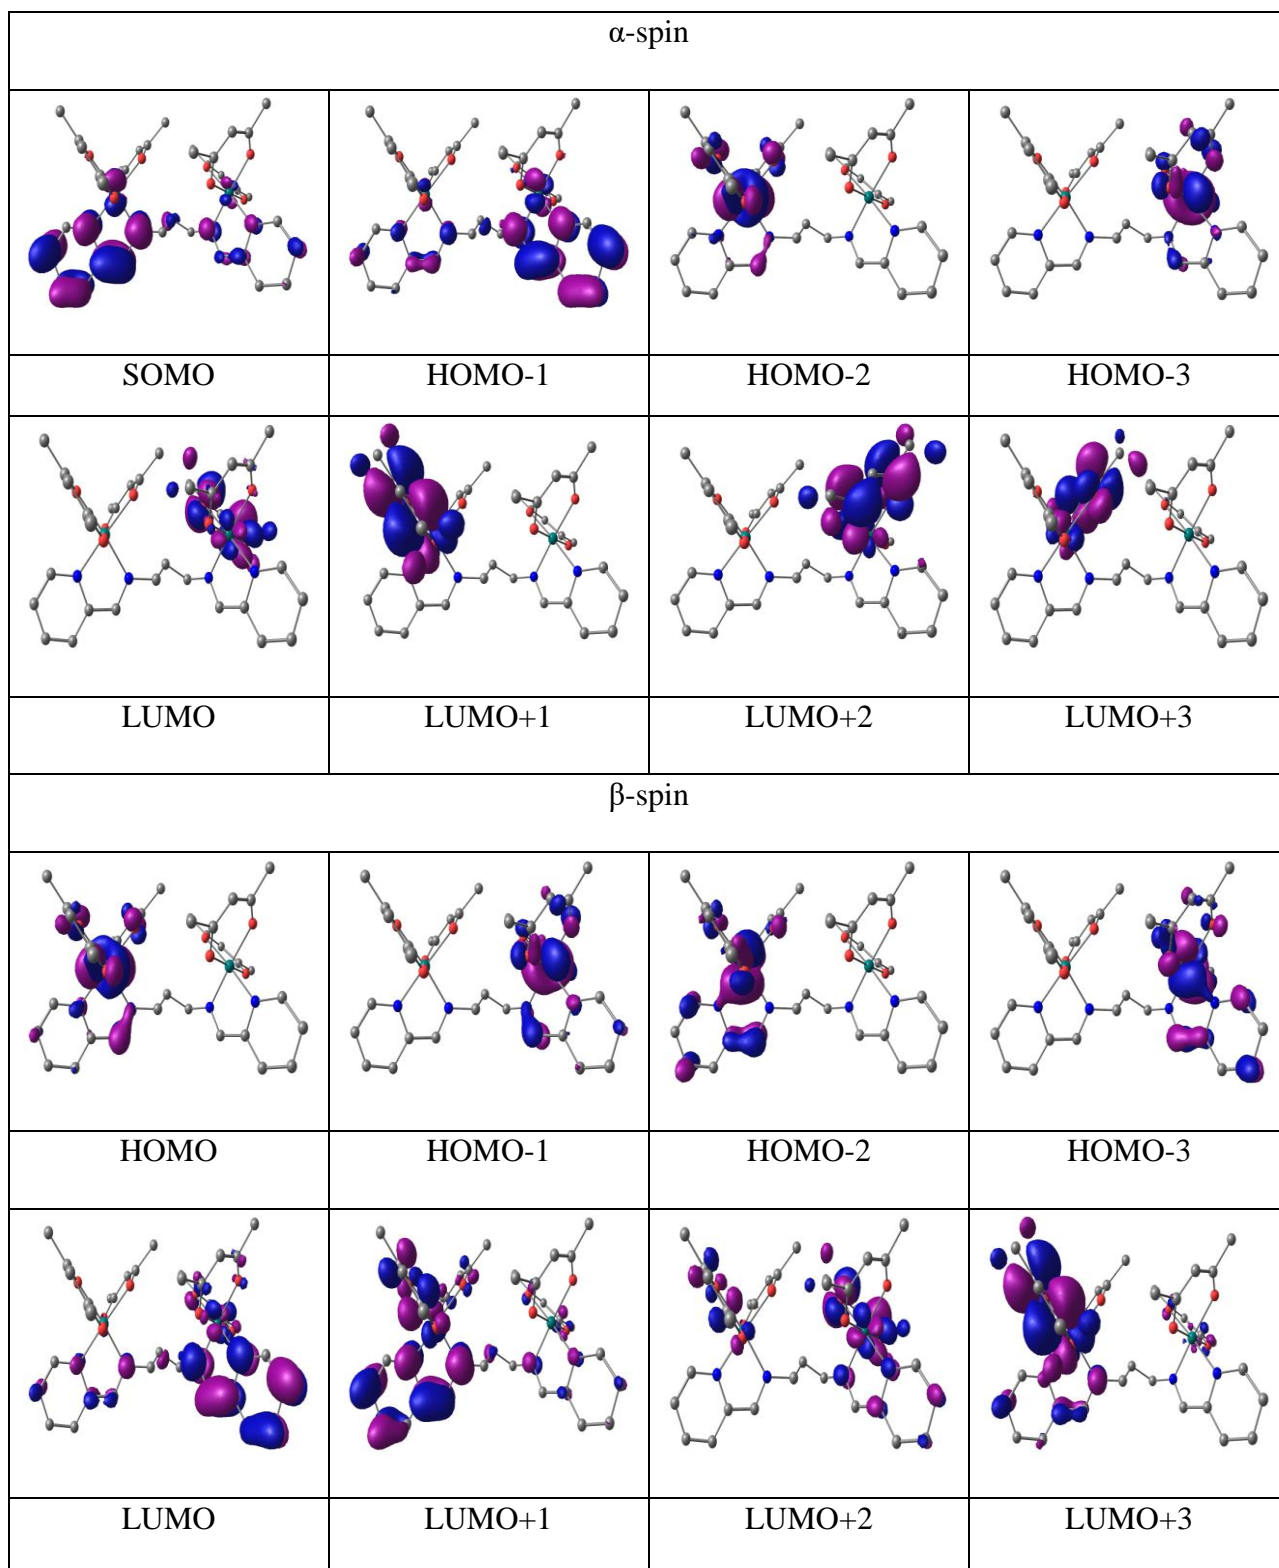

**Table S21** Composition and energies of selected molecular orbitals of **3a<sup>4+</sup>** (*S*=1)

| MO             | Energy (eV) | % Composition |      |    |
|----------------|-------------|---------------|------|----|
|                |             | Ru            | acac | L  |
| $\alpha$ -spin |             |               |      |    |
| LUMO+5         | -11.340     | 13            | 50   | 37 |
| LUMO+4         | -11.365     | 14            | 57   | 29 |
| LUMO+3         | -11.477     | 35            | 56   | 9  |
| LUMO+2         | -11.491     | 35            | 54   | 10 |
| LUMO+1         | -14.590     | 44            | 42   | 14 |
| LUMO           | -14.647     | 42            | 48   | 10 |
| SOMO 1         | -16.301     | 22            | 41   | 37 |
| SOMO 2         | -16.407     | 25            | 43   | 32 |
| HOMO-2         | -16.626     | 21            | 71   | 8  |
| HOMO-3         | -16.654     | 23            | 69   | 8  |
| HOMO-4         | -16.863     | 4             | 3    | 94 |
| HOMO-5         | -16.885     | 3             | 2    | 94 |
| $\beta$ -spin  |             |               |      |    |
| LUMO+5         | -11.435     | 20            | 71   | 9  |
| LUMO+4         | -11.436     | 19            | 73   | 8  |
| LUMO+3         | -14.092     | 42            | 11   | 46 |
| LUMO+2         | -14.282     | 46            | 13   | 41 |
| LUMO+1         | -14.458     | 47            | 49   | 4  |
| LUMO           | -14.496     | 45            | 51   | 4  |
| HOMO           | -16.431     | 27            | 66   | 7  |
| HOMO-1         | -16.448     | 30            | 61   | 9  |
| HOMO-2         | -16.656     | 16            | 52   | 32 |
| HOMO-3         | -16.713     | 13            | 49   | 38 |
| HOMO-4         | -16.811     | 9             | 10   | 81 |
| HOMO-5         | -16.833     | 10            | 7    | 83 |

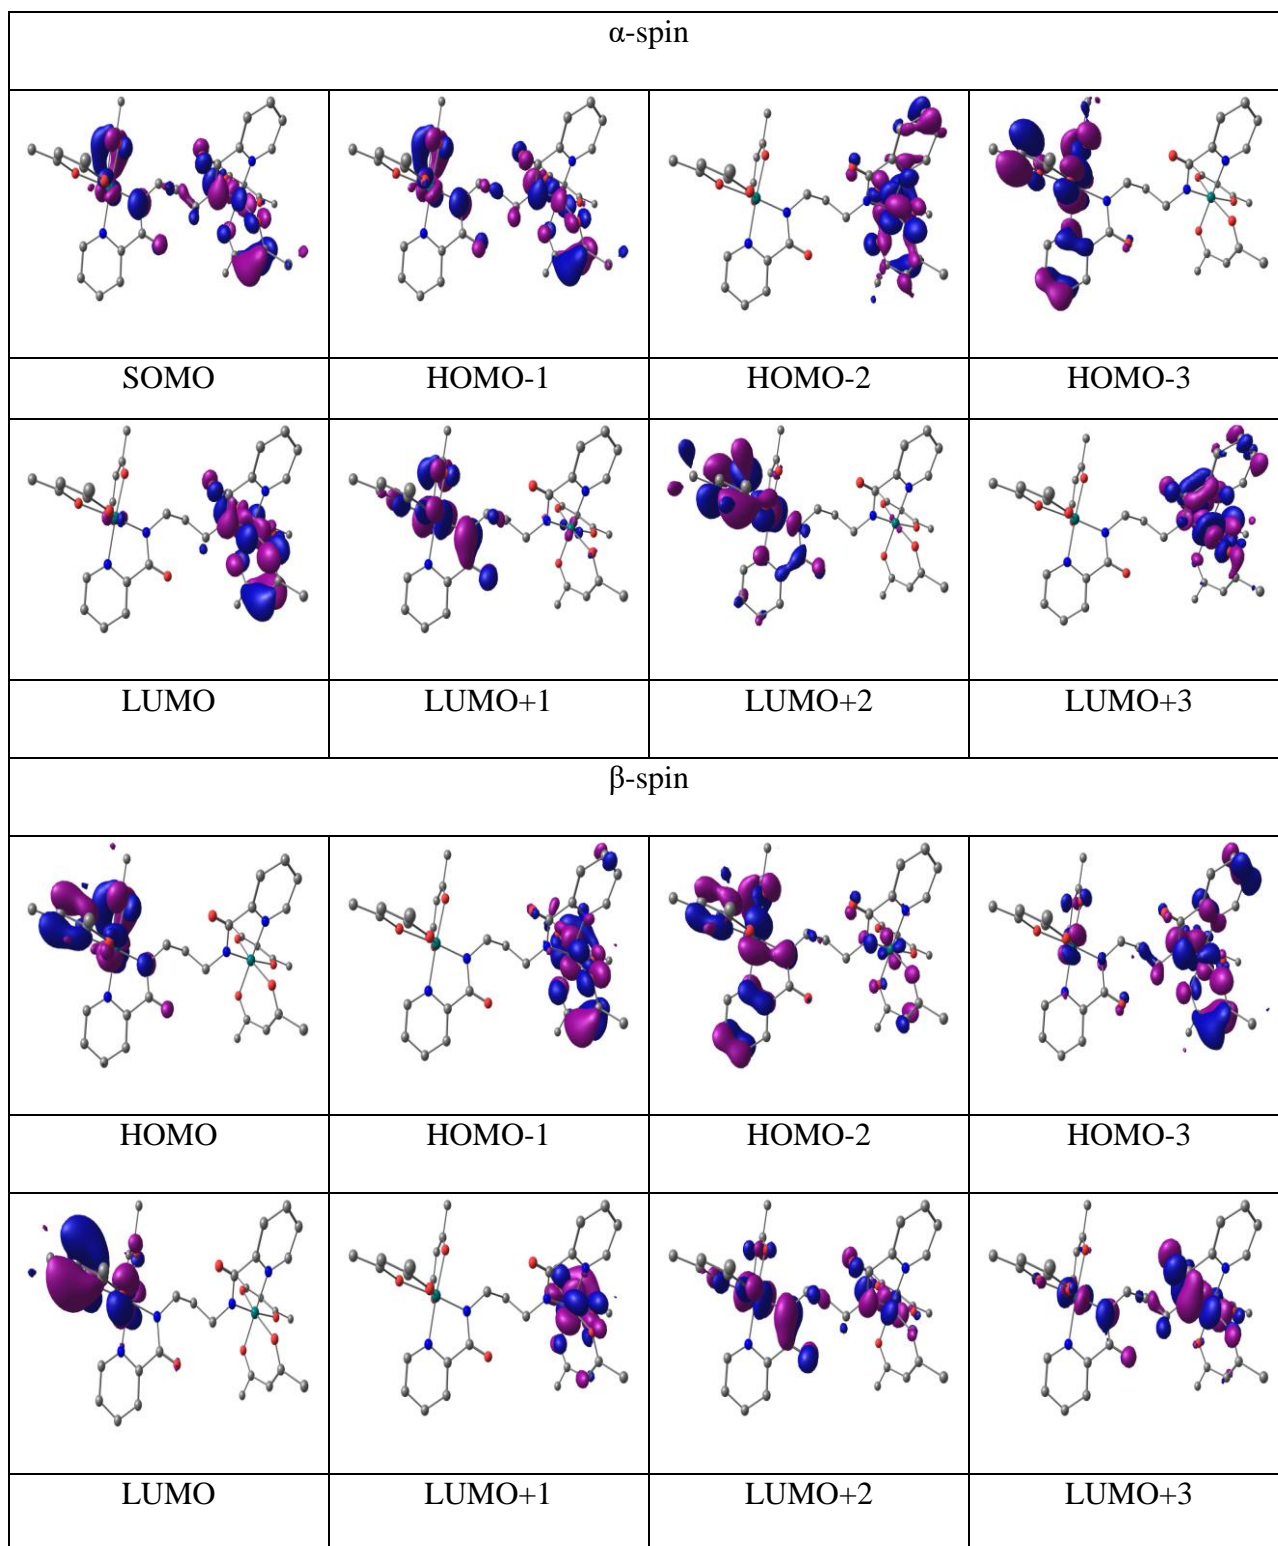

**Table S22** Composition and energies of selected molecular orbitals of **3a<sup>3+</sup>** (*S*=3/2)

| MO             | Energy (eV) | % Composition |      |    |
|----------------|-------------|---------------|------|----|
|                |             | Ru            | acac | L  |
| $\alpha$ -spin |             |               |      |    |
| LUMO+5         | -8.753      | 39            | 49   | 12 |
| LUMO+4         | -8.963      | 5             | 89   | 6  |
| LUMO+3         | -9.188      | 16            | 49   | 35 |
| LUMO+2         | -9.233      | 17            | 26   | 57 |
| LUMO+1         | -9.524      | 45            | 41   | 14 |
| LUMO           | -12.600     | 36            | 26   | 37 |
| SOMO 1         | -13.067     | 32            | 48   | 20 |
| SOMO 2         | -13.535     | 22            | 37   | 40 |
| SOMO 3         | -13.707     | 2             | 85   | 13 |
| HOMO-3         | -14.173     | 9             | 59   | 32 |
| HOMO-4         | -14.243     | 15            | 21   | 64 |
| HOMO-5         | -14.350     | 14            | 8    | 78 |
| $\beta$ -spin  |             |               |      |    |
| LUMO+5         | -9.121      | 20            | 30   | 50 |
| LUMO+4         | -9.334      | 26            | 42   | 33 |
| LUMO+3         | -10.994     | 56            | 22   | 22 |
| LUMO+2         | -11.338     | 58            | 29   | 13 |
| LUMO+1         | -11.715     | 52            | 23   | 25 |
| LUMO           | -12.428     | 54            | 37   | 9  |
| HOMO           | -13.437     | 2             | 89   | 9  |
| HOMO-1         | -13.654     | 36            | 48   | 16 |
| HOMO-2         | -14.048     | 39            | 14   | 46 |
| HOMO-3         | -14.131     | 5             | 87   | 8  |
| HOMO-4         | -14.250     | 11            | 28   | 61 |
| HOMO-5         | -14.319     | 7             | 9    | 84 |



| $\alpha$ -spin                                                                      |                                                                                     |                                                                                      |                                                                                       |
|-------------------------------------------------------------------------------------|-------------------------------------------------------------------------------------|--------------------------------------------------------------------------------------|---------------------------------------------------------------------------------------|
| 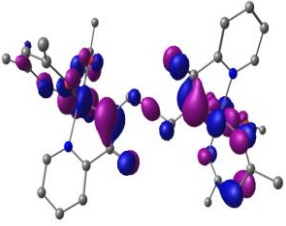   |    |    |    |
| SOMO                                                                                | HOMO-1                                                                              | HOMO-2                                                                               | HOMO-3                                                                                |
|    |    |    |    |
| LUMO                                                                                | LUMO+1                                                                              | LUMO+2                                                                               | LUMO+3                                                                                |
| $\beta$ -spin                                                                       |                                                                                     |                                                                                      |                                                                                       |
|  |  |  |  |
| HOMO                                                                                | HOMO-1                                                                              | HOMO-2                                                                               | HOMO-3                                                                                |
|  |  |  |  |
| LUMO                                                                                | LUMO+1                                                                              | LUMO+2                                                                               | LUMO+3                                                                                |

**Table S23** Composition and energies of selected molecular orbitals of **3a<sup>2+</sup>** (*S*=1)

| MO             | Energy (eV) | % Composition |      |    |
|----------------|-------------|---------------|------|----|
|                |             | Ru            | acac | L  |
| $\alpha$ -spin |             |               |      |    |
| LUMO+5         | -6.384      | 6             | 90   | 4  |
| LUMO+4         | -6.529      | 5             | 19   | 76 |
| LUMO+3         | -6.570      | 18            | 66   | 16 |
| LUMO+2         | -6.755      | 51            | 39   | 10 |
| LUMO+1         | -6.841      | 3             | 2    | 95 |
| LUMO           | -9.164      | 52            | 22   | 26 |
| SOMO 1         | -11.030     | 34            | 51   | 15 |
| SOMO 2         | -11.389     | 23            | 65   | 12 |
| SOMO 3         | -11.470     | 2             | 84   | 14 |
| HOMO-3         | -11.688     | 52            | 20   | 28 |
| HOMO-4         | -11.731     | 29            | 45   | 26 |
| HOMO-5         | -11.794     | 18            | 65   | 18 |
| $\beta$ -spin  |             |               |      |    |
| LUMO+5         | -6.485      | 11            | 80   | 9  |
| LUMO+4         | -6.531      | 5             | 18   | 78 |
| LUMO+3         | -6.669      | 4             | 10   | 87 |
| LUMO+2         | -8.923      | 54            | 16   | 30 |
| LUMO+1         | -9.166      | 53            | 22   | 24 |
| LUMO           | -9.485      | 59            | 26   | 15 |
| HOMO           | -11.033     | 35            | 51   | 14 |
| HOMO-1         | -11.332     | 10            | 75   | 15 |
| HOMO-2         | -11.491     | 4             | 85   | 11 |
| HOMO-3         | -11.683     | 47            | 41   | 11 |
| HOMO-4         | -11.717     | 50            | 34   | 16 |
| HOMO-5         | -11.960     | 43            | 25   | 32 |

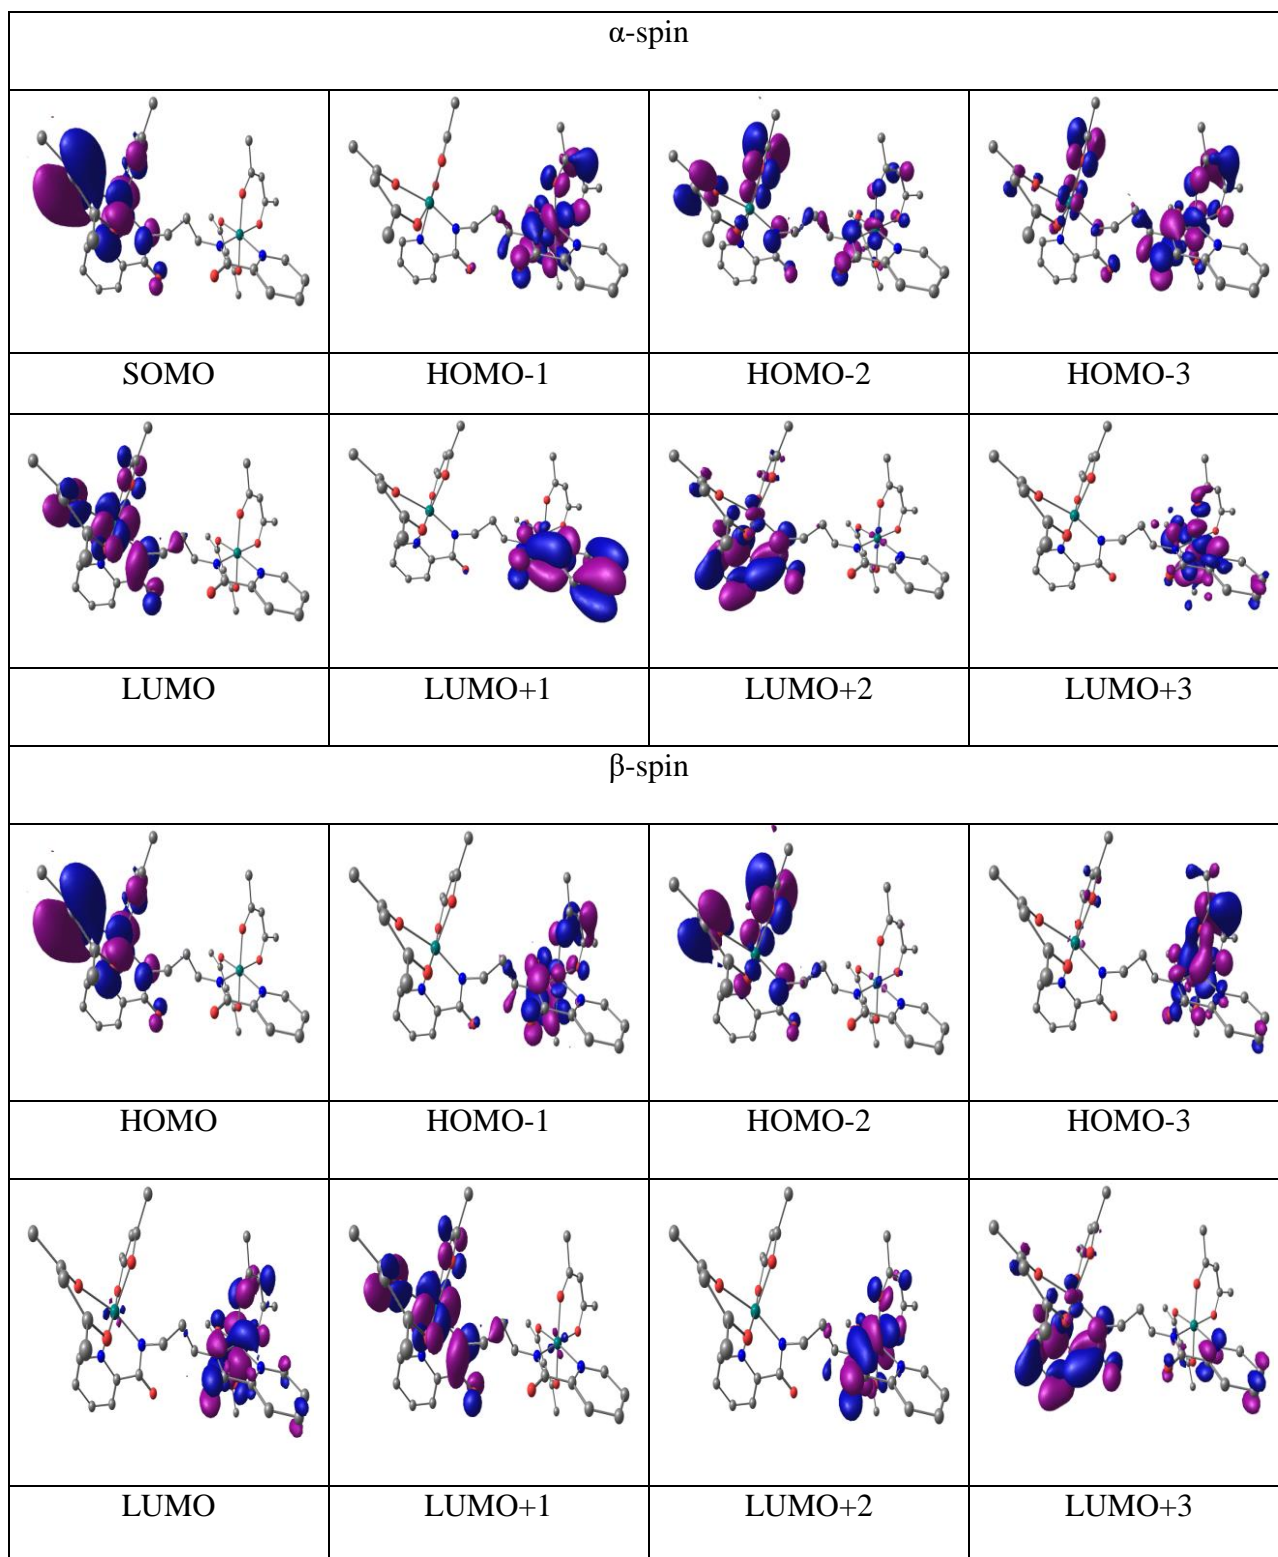

**Table S24** Composition and energies of selected molecular orbitals of **3a<sup>+</sup>** (*S*=1/2)

| MO             | Energy (eV) | % Composition |      |    |
|----------------|-------------|---------------|------|----|
|                |             | Ru            | acac | L  |
| $\alpha$ -spin |             |               |      |    |
| LUMO+5         | -3.494      | 4             | 6    | 90 |
| LUMO+4         | -3.684      | 5             | 90   | 6  |
| LUMO+3         | -3.767      | 16            | 78   | 7  |
| LUMO+2         | -3.897      | 3             | 2    | 94 |
| LUMO+1         | -4.168      | 4             | 4    | 93 |
| LUMO           | -7.084      | 37            | 10   | 53 |
| SOMO           | -7.788      | 46            | 15   | 40 |
| HOMO-1         | -8.167      | 33            | 62   | 5  |
| HOMO-2         | -8.481      | 22            | 65   | 13 |
| HOMO-3         | -8.568      | 30            | 66   | 5  |
| HOMO-4         | -8.830      | 53            | 35   | 12 |
| HOMO-5         | -8.881      | 13            | 73   | 14 |
| $\beta$ -spin  |             |               |      |    |
| LUMO+5         | -3.662      | 5             | 88   | 8  |
| LUMO+4         | -3.733      | 10            | 85   | 5  |
| LUMO+3         | -3.923      | 3             | 2    | 94 |
| LUMO+2         | -4.243      | 3             | 3    | 94 |
| LUMO+1         | -5.635      | 68            | 17   | 15 |
| LUMO           | -6.152      | 67            | 21   | 12 |
| HOMO           | -8.001      | 46            | 40   | 14 |
| HOMO-1         | -8.348      | 41            | 49   | 9  |
| HOMO-2         | -8.483      | 42            | 43   | 15 |
| HOMO-3         | -8.640      | 36            | 51   | 12 |
| HOMO-4         | -8.834      | 21            | 70   | 9  |
| HOMO-5         | -8.984      | 52            | 35   | 13 |

| $\alpha$ -spin                                                                      |                                                                                     |                                                                                      |                                                                                       |
|-------------------------------------------------------------------------------------|-------------------------------------------------------------------------------------|--------------------------------------------------------------------------------------|---------------------------------------------------------------------------------------|
| 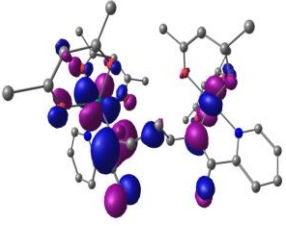   |    |    |    |
| SOMO                                                                                | HOMO-1                                                                              | HOMO-2                                                                               | HOMO-3                                                                                |
|    |    |    |    |
| LUMO                                                                                | LUMO+1                                                                              | LUMO+2                                                                               | LUMO+3                                                                                |
| $\beta$ -spin                                                                       |                                                                                     |                                                                                      |                                                                                       |
|  |  |  |  |
| HOMO                                                                                | HOMO-1                                                                              | HOMO-2                                                                               | HOMO-3                                                                                |
|  |  |  |  |
| LUMO                                                                                | LUMO+1                                                                              | LUMO+2                                                                               | LUMO+3                                                                                |

**Table S25** Composition and energies of selected molecular orbitals of **3a** ( $S=1$ )

| MO             | Energy (eV) | % Composition |      |    |
|----------------|-------------|---------------|------|----|
|                |             | Ru            | acac | L  |
| $\alpha$ -spin |             |               |      |    |
| LUMO+5         | -0.691      | 3             | 4    | 94 |
| LUMO+4         | -0.811      | 6             | 88   | 6  |
| LUMO+3         | -0.906      | 5             | 89   | 7  |
| LUMO+2         | -0.956      | 4             | 90   | 7  |
| LUMO+1         | -1.215      | 4             | 6    | 90 |
| LUMO           | -1.244      | 4             | 7    | 89 |
| SOMO 1         | -4.930      | 36            | 32   | 32 |
| SOMO 2         | -5.099      | 37            | 36   | 27 |
| SOMO 3         | -5.264      | 46            | 16   | 38 |
| HOMO-3         | -5.346      | 49            | 37   | 14 |
| HOMO-4         | -5.675      | 48            | 20   | 32 |
| HOMO-5         | -5.712      | 63            | 22   | 15 |
| $\beta$ -spin  |             |               |      |    |
| LUMO+5         | -0.863      | 8             | 80   | 12 |
| LUMO+4         | -0.890      | 5             | 86   | 9  |
| LUMO+3         | -1.166      | 5             | 10   | 86 |
| LUMO+2         | -1.200      | 4             | 12   | 84 |
| LUMO+1         | -2.359      | 62            | 17   | 20 |
| LUMO           | -2.537      | 65            | 17   | 18 |
| HOMO           | -4.820      | 41            | 38   | 21 |
| HOMO-1         | -5.010      | 57            | 28   | 15 |
| HOMO-2         | -5.420      | 68            | 19   | 13 |
| HOMO-3         | -5.427      | 66            | 16   | 18 |
| HOMO-4         | -5.654      | 26            | 65   | 9  |
| HOMO-5         | -5.744      | 18            | 25   | 57 |

| $\alpha$ -spin                                                                      |                                                                                     |                                                                                      |                                                                                       |
|-------------------------------------------------------------------------------------|-------------------------------------------------------------------------------------|--------------------------------------------------------------------------------------|---------------------------------------------------------------------------------------|
| 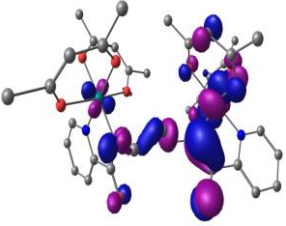   |    |    |    |
| SOMO                                                                                | HOMO-1                                                                              | HOMO-2                                                                               | HOMO-3                                                                                |
|    |    |    |    |
| LUMO                                                                                | LUMO+1                                                                              | LUMO+2                                                                               | LUMO+3                                                                                |
| $\beta$ -spin                                                                       |                                                                                     |                                                                                      |                                                                                       |
|  |  |  |  |
| HOMO                                                                                | HOMO-1                                                                              | HOMO-2                                                                               | HOMO-3                                                                                |
|  |  |  |  |
| LUMO                                                                                | LUMO+1                                                                              | LUMO+2                                                                               | LUMO+3                                                                                |

**Table S26** Composition and energies of selected molecular orbitals of **3a**<sup>2-</sup> (*S*=0)

| MO     | Energy (eV) | % Composition |      |    |
|--------|-------------|---------------|------|----|
|        |             | Ru            | acac | L  |
| LUMO+5 | 4.475       | 6             | 81   | 13 |
| LUMO+4 | 4.440       | 6             | 53   | 42 |
| LUMO+3 | 4.419       | 5             | 41   | 54 |
| LUMO+2 | 4.319       | 5             | 10   | 85 |
| LUMO+1 | 4.003       | 6             | 13   | 81 |
| LUMO   | 3.916       | 7             | 7    | 86 |
| HOMO   | 1.911       | 57            | 12   | 30 |
| HOMO-1 | 1.701       | 59            | 13   | 28 |
| HOMO-2 | 1.079       | 70            | 18   | 11 |
| HOMO-3 | 1.012       | 69            | 20   | 11 |
| HOMO-4 | 0.873       | 77            | 14   | 9  |
| HOMO-5 | 0.781       | 76            | 15   | 9  |

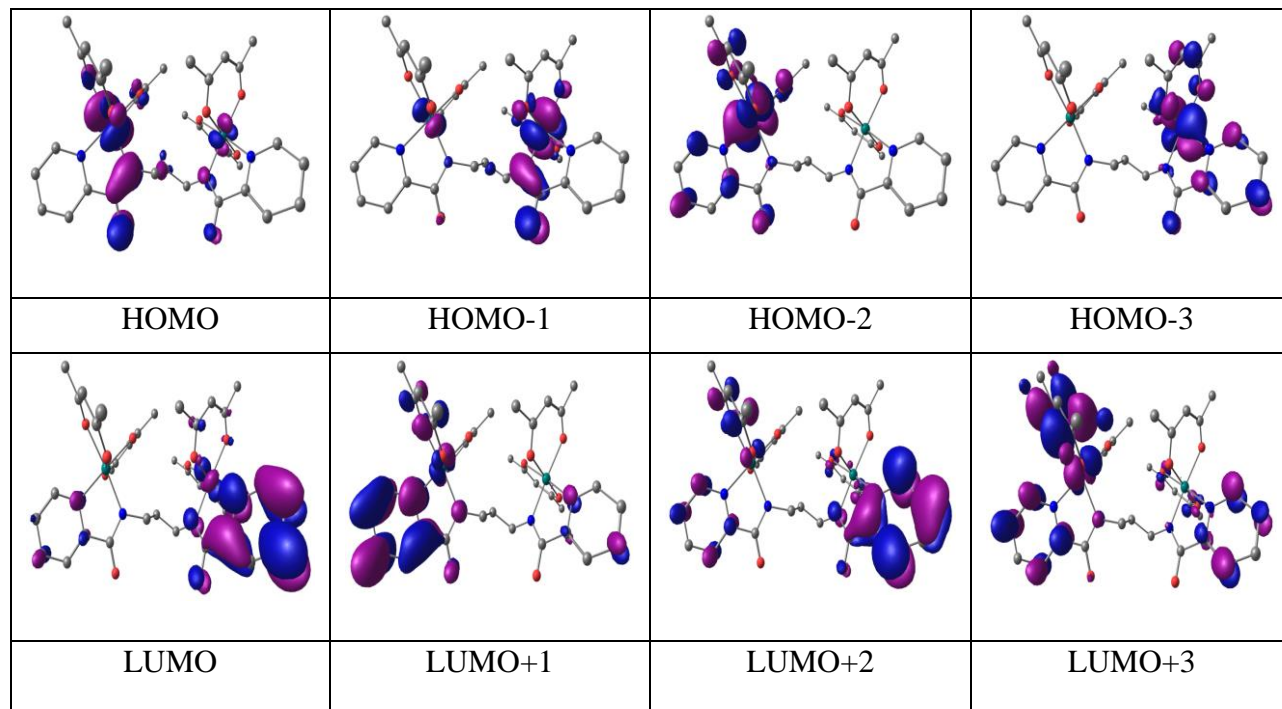



**Table S27** Composition and energies of selected molecular orbitals of **4<sup>2+</sup>** (*S*=1)

| MO             | Energy (eV) | % Composition |      |    |
|----------------|-------------|---------------|------|----|
|                |             | Ru            | acac | L  |
| $\alpha$ -spin |             |               |      |    |
| LUMO+5         | -5.715      | 5             | 91   | 4  |
| LUMO+4         | -5.746      | 5             | 89   | 6  |
| LUMO+3         | -5.903      | 3             | 2    | 95 |
| LUMO+2         | -5.954      | 2             | 2    | 95 |
| LUMO+1         | -7.227      | 7             | 2    | 91 |
| LUMO           | -7.273      | 7             | 3    | 90 |
| SOMO 1         | -10.499     | 30            | 67   | 3  |
| SOMO 2         | -10.580     | 29            | 68   | 3  |
| HOMO-2         | -10.816     | 43            | 50   | 6  |
| HOMO-3         | -10.908     | 50            | 42   | 8  |
| HOMO-4         | -11.219     | 74            | 19   | 7  |
| HOMO-5         | -11.254     | 72            | 20   | 8  |
| $\beta$ -spin  |             |               |      |    |
| LUMO+5         | -5.867      | 4             | 2    | 93 |
| LUMO+4         | -5.925      | 3             | 5    | 92 |
| LUMO+3         | -7.200      | 10            | 3    | 88 |
| LUMO+2         | -7.253      | 9             | 3    | 88 |
| LUMO+1         | -7.941      | 63            | 30   | 7  |
| LUMO           | -8.028      | 65            | 27   | 8  |
| HOMO           | -10.544     | 51            | 41   | 8  |
| HOMO-1         | -10.623     | 58            | 33   | 9  |
| HOMO-2         | -10.799     | 60            | 33   | 7  |
| HOMO-3         | -10.804     | 59            | 32   | 7  |
| HOMO-4         | -11.029     | 21            | 74   | 5  |
| HOMO-5         | -11.080     | 27            | 67   | 6  |

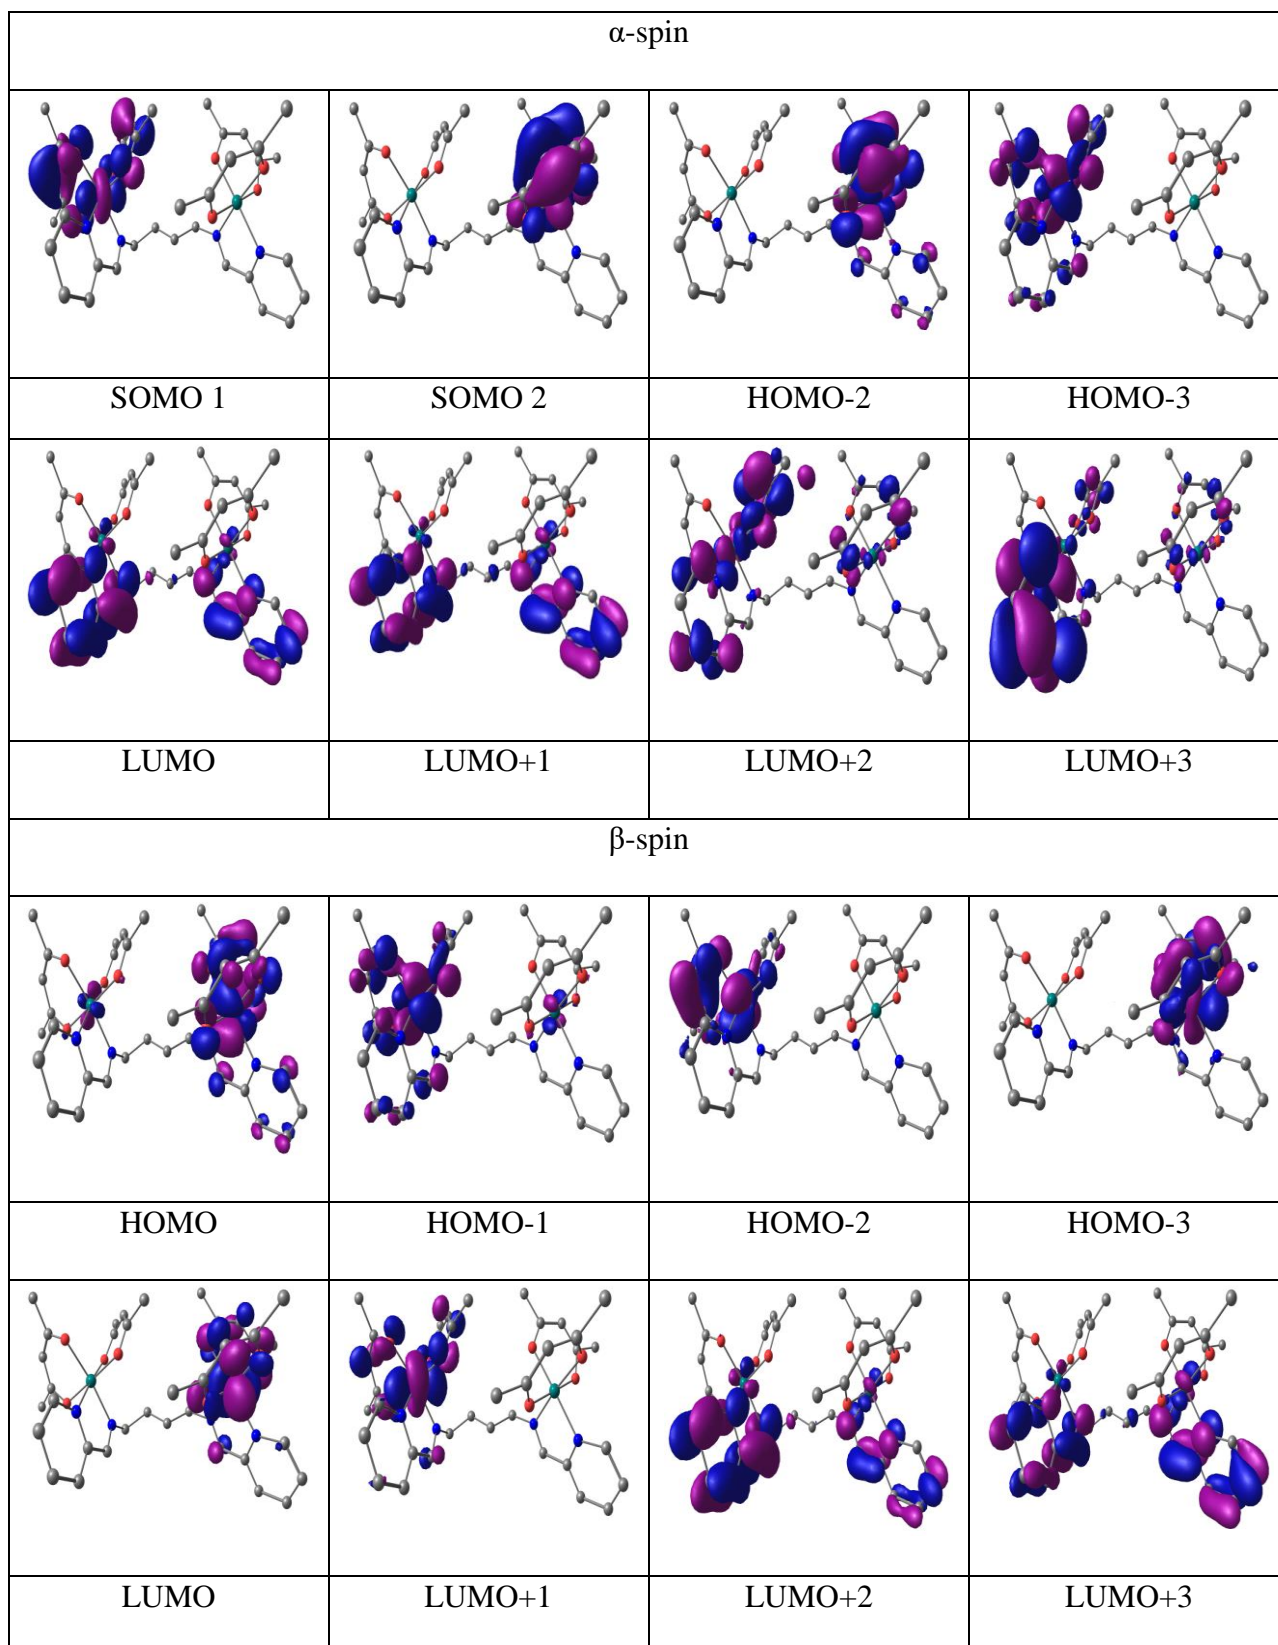

**Table S28** Composition and energies of selected molecular orbitals of **4** ( $S=0$ )

| MO     | Energy (eV) | % Composition |      |    |
|--------|-------------|---------------|------|----|
|        |             | Ru            | acac | L  |
| LUMO+5 | -0.362      | 4             | 92   | 3  |
| LUMO+4 | -0.405      | 5             | 91   | 4  |
| LUMO+3 | -0.719      | 4             | 2    | 94 |
| LUMO+2 | -0.722      | 4             | 2    | 94 |
| LUMO+1 | -1.702      | 13            | 4    | 83 |
| LUMO   | -1.734      | 13            | 4    | 83 |
| HOMO   | -3.806      | 62            | 33   | 5  |
| HOMO-1 | -3.835      | 63            | 32   | 5  |
| HOMO-2 | -4.468      | 67            | 17   | 16 |
| HOMO-3 | -4.473      | 68            | 17   | 15 |
| HOMO-4 | -4.602      | 78            | 15   | 6  |
| HOMO-5 | -4.603      | 78            | 16   | 6  |

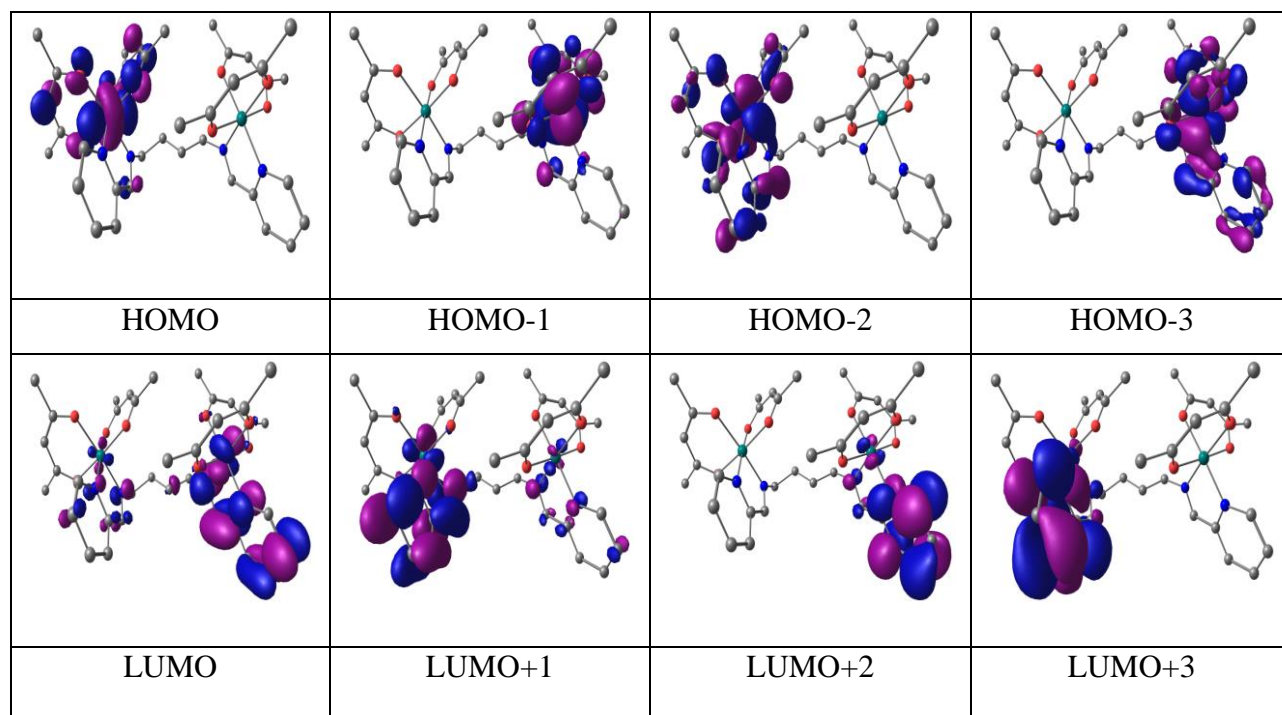

**Table S29** Composition and energies of selected molecular orbitals of **4<sup>-</sup>** (*S*=1/2)

| MO             | Energy (eV) | % Composition |      |    |
|----------------|-------------|---------------|------|----|
|                |             | Ru            | acac | L  |
| $\alpha$ -spin |             |               |      |    |
| LUMO+5         | 2.251       | 5             | 91   | 4  |
| LUMO+4         | 2.099       | 6             | 28   | 66 |
| LUMO+3         | 2.078       | 3             | 30   | 67 |
| LUMO+2         | 2.049       | 6             | 72   | 23 |
| LUMO+1         | 2.003       | 3             | 76   | 21 |
| LUMO           | 0.656       | 14            | 4    | 82 |
| SOMO           | 0.223       | 14            | 4    | 82 |
| HOMO-1         | -1.505      | 71            | 23   | 7  |
| HOMO-2         | -1.512      | 71            | 22   | 7  |
| HOMO-3         | -1.932      | 71            | 17   | 11 |
| HOMO-4         | -1.960      | 72            | 17   | 12 |
| HOMO-5         | -1.968      | 74            | 16   | 9  |
| $\beta$ -spin  |             |               |      |    |
| LUMO+5         | 2.155       | 7             | 13   | 81 |
| LUMO+4         | 2.134       | 3             | 20   | 76 |
| LUMO+3         | 2.069       | 6             | 87   | 7  |
| LUMO+2         | 2.023       | 4             | 84   | 12 |
| LUMO+1         | 1.376       | 12            | 7    | 82 |
| LUMO           | 1.331       | 11            | 7    | 82 |
| HOMO           | -1.472      | 70            | 21   | 9  |
| HOMO-1         | -1.481      | 71            | 22   | 7  |
| HOMO-2         | -1.779      | 68            | 18   | 14 |
| HOMO-3         | -1.818      | 69            | 17   | 14 |
| HOMO-4         | -1.922      | 78            | 15   | 7  |
| HOMO-5         | -1.949      | 78            | 15   | 7  |

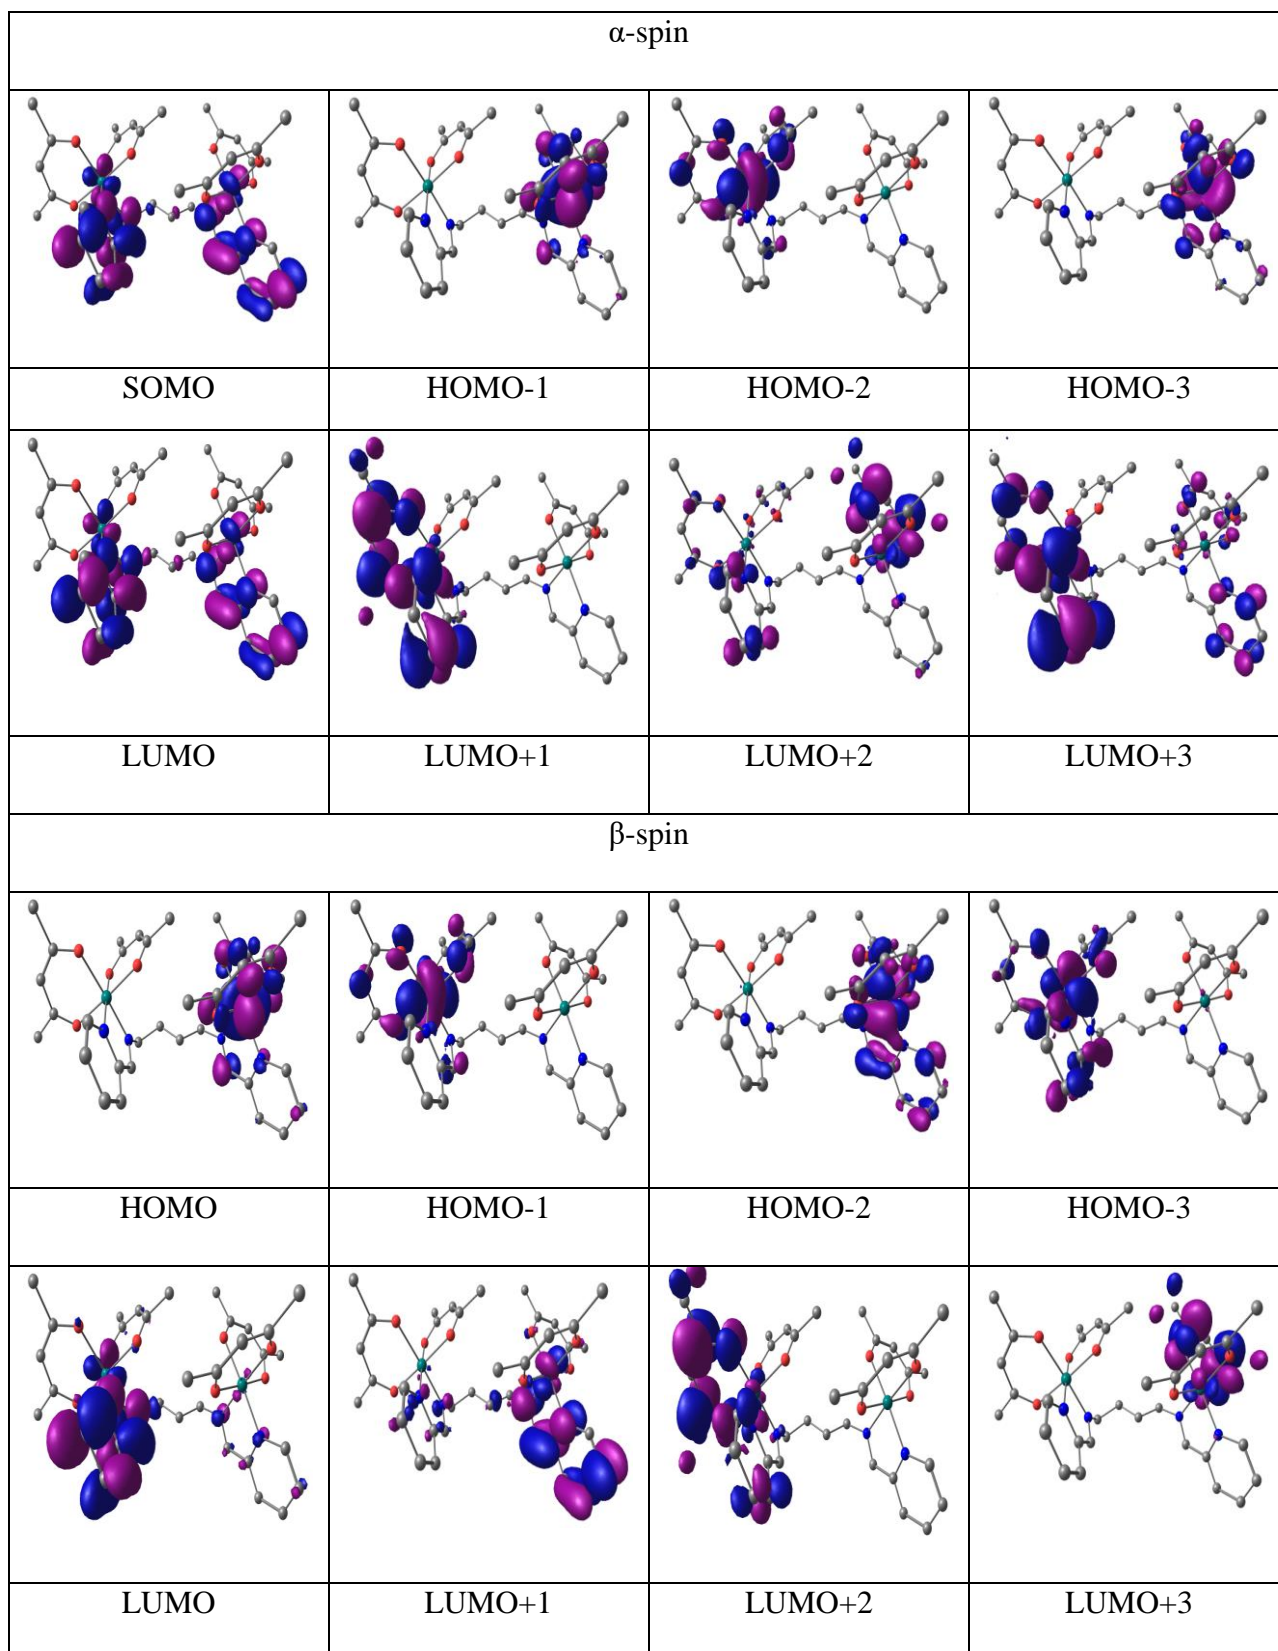

**Table S30** Composition and energies of selected molecular orbitals of  $\mathbf{4}^{2-}$  ( $S=1$ )

| MO             | Energy (eV) | % Composition |      |    |
|----------------|-------------|---------------|------|----|
|                |             | Ru            | acac | L  |
| $\alpha$ -spin |             |               |      |    |
| LUMO+5         | 4.985       | 9             | 6    | 85 |
| LUMO+4         | 4.969       | 12            | 8    | 80 |
| LUMO+3         | 4.738       | 5             | 84   | 11 |
| LUMO+2         | 4.670       | 6             | 90   | 4  |
| LUMO+1         | 4.457       | 6             | 92   | 2  |
| LUMO           | 4.341       | 5             | 92   | 3  |
| SOMO 1         | 2.751       | 13            | 5    | 82 |
| SOMO 2         | 2.714       | 13            | 5    | 82 |
| HOMO-2         | 1.269       | 74            | 18   | 8  |
| HOMO-3         | 1.229       | 74            | 19   | 7  |
| HOMO-4         | 0.864       | 77            | 16   | 7  |
| HOMO-5         | 0.789       | 78            | 16   | 7  |
| $\beta$ -spin  |             |               |      |    |
| LUMO+5         | 4.808       | 8             | 71   | 21 |
| LUMO+4         | 4.774       | 10            | 69   | 22 |
| LUMO+3         | 4.605       | 12            | 47   | 41 |
| LUMO+2         | 4.531       | 10            | 48   | 42 |
| LUMO+1         | 4.399       | 3             | 72   | 25 |
| LUMO           | 4.305       | 3             | 82   | 16 |
| HOMO           | 1.352       | 72            | 17   | 11 |
| HOMO-1         | 1.283       | 73            | 18   | 9  |
| HOMO-2         | 1.086       | 72            | 16   | 11 |
| HOMO-3         | 1.003       | 73            | 15   | 12 |
| HOMO-4         | 0.907       | 77            | 16   | 7  |
| HOMO-5         | 0.826       | 77            | 16   | 7  |

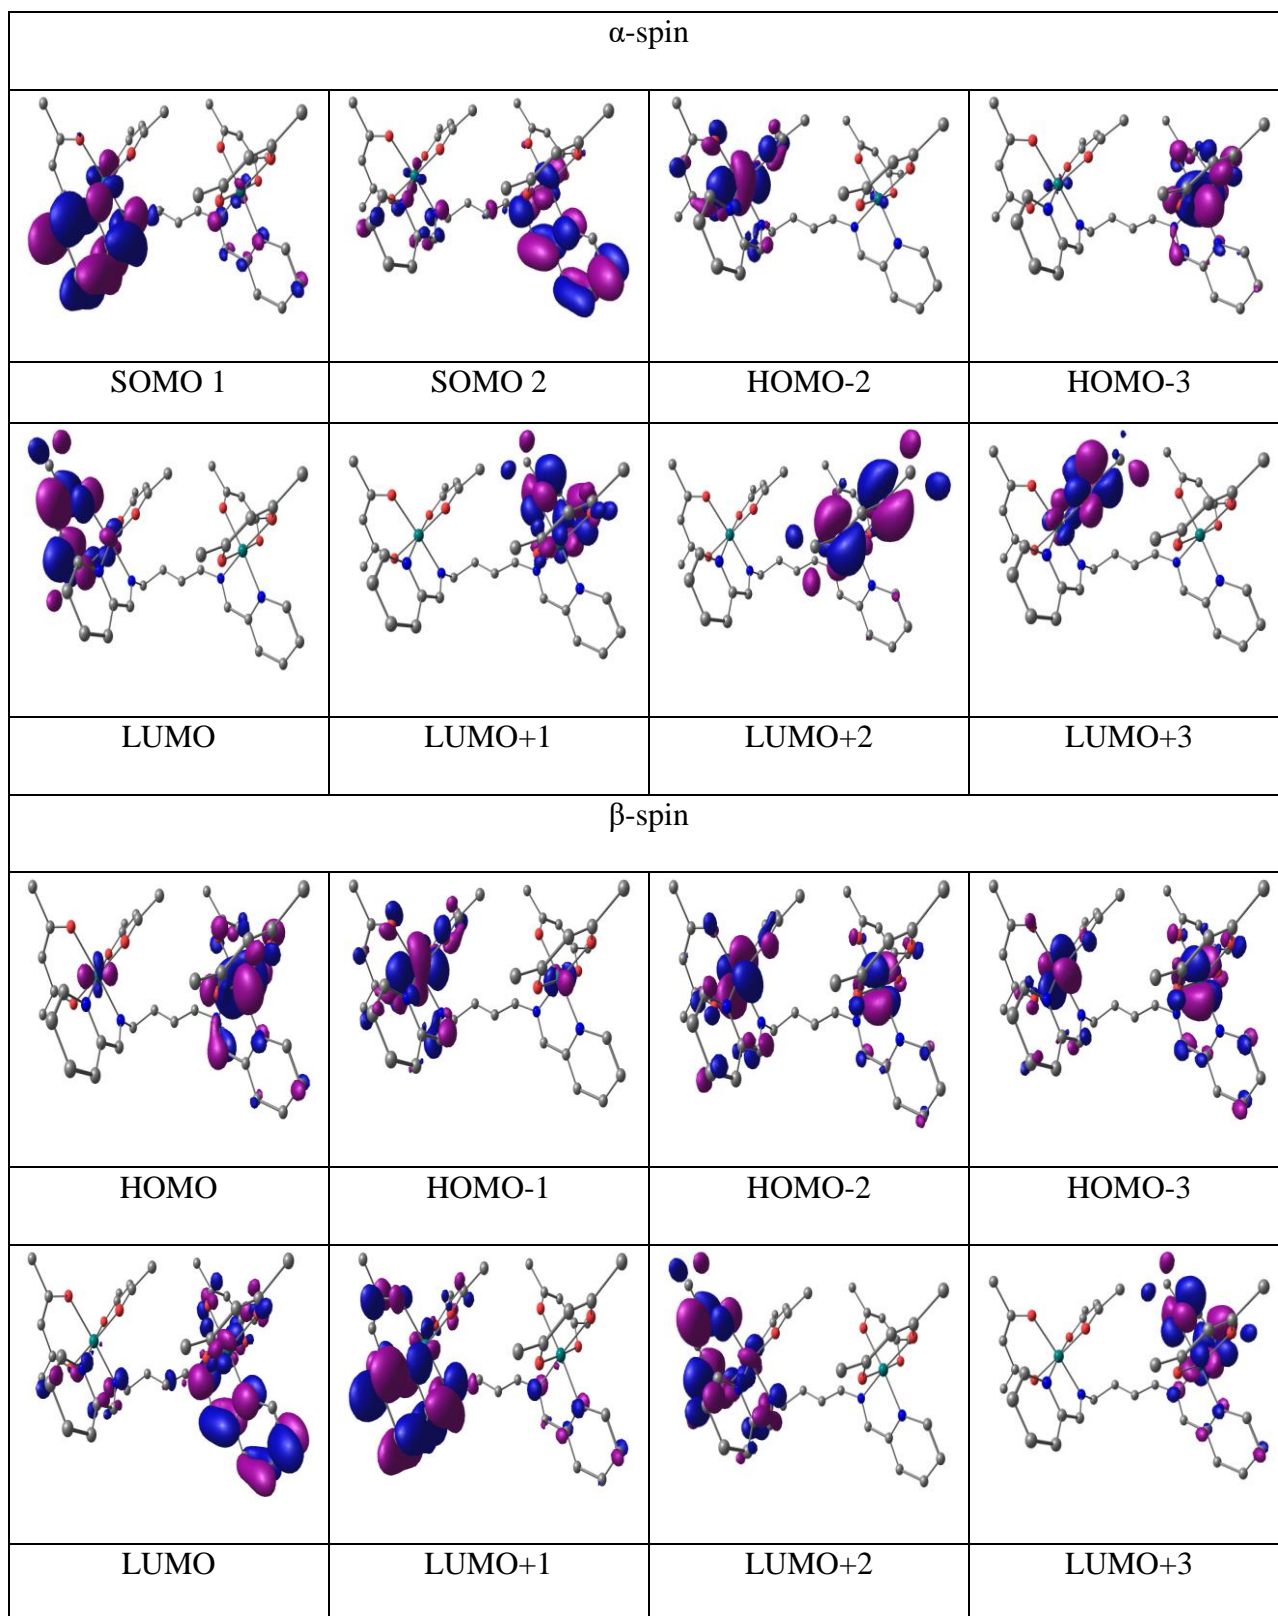

**Table S31** Composition and energies of selected molecular orbitals of **4a<sup>4+</sup>** (*S*=1)

| MO             | Energy (eV) | % Composition |      |    |
|----------------|-------------|---------------|------|----|
|                |             | Ru            | acac | L  |
| $\alpha$ -spin |             |               |      |    |
| LUMO+5         | -11.415     | 28            | 61   | 11 |
| LUMO+4         | -11.418     | 29            | 60   | 11 |
| LUMO+3         | -11.755     | 42            | 51   | 7  |
| LUMO+2         | -11.784     | 41            | 51   | 8  |
| LUMO+1         | -14.805     | 42            | 43   | 15 |
| LUMO           | -14.824     | 42            | 45   | 13 |
| SOMO 1         | -16.417     | 18            | 49   | 33 |
| SOMO 2         | -16.490     | 20            | 53   | 26 |
| HOMO-2         | -16.730     | 3             | 4    | 92 |
| HOMO-3         | -16.748     | 3             | 5    | 92 |
| HOMO-4         | -16.863     | 23            | 55   | 22 |
| HOMO-5         | -16.883     | 26            | 54   | 20 |
| $\beta$ -spin  |             |               |      |    |
| LUMO+5         | -11.618     | 39            | 54   | 7  |
| LUMO+4         | -11.650     | 38            | 55   | 7  |
| LUMO+3         | -14.257     | 39            | 11   | 49 |
| LUMO+2         | -14.359     | 42            | 14   | 44 |
| LUMO+1         | -14.797     | 47            | 45   | 8  |
| LUMO           | -14.824     | 48            | 42   | 10 |
| HOMO           | -16.565     | 32            | 42   | 26 |
| HOMO-1         | -16.581     | 31            | 45   | 24 |
| HOMO-2         | -16.657     | 8             | 5    | 87 |
| HOMO-3         | -16.674     | 7             | 4    | 89 |
| HOMO-4         | -16.811     | 11            | 74   | 15 |
| HOMO-5         | -16.865     | 6             | 67   | 28 |



| $\alpha$ -spin                                                                      |                                                                                     |                                                                                      |                                                                                       |
|-------------------------------------------------------------------------------------|-------------------------------------------------------------------------------------|--------------------------------------------------------------------------------------|---------------------------------------------------------------------------------------|
| 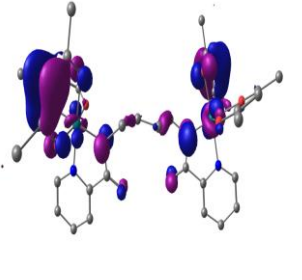   |    |    |    |
| SOMO 1                                                                              | SOMO 2                                                                              | HOMO-2                                                                               | HOMO-3                                                                                |
|    |    |    |    |
| LUMO                                                                                | LUMO+1                                                                              | LUMO+2                                                                               | LUMO+3                                                                                |
| $\beta$ -spin                                                                       |                                                                                     |                                                                                      |                                                                                       |
|  |  |  |  |
| HOMO                                                                                | HOMO-1                                                                              | HOMO-2                                                                               | HOMO-3                                                                                |
|  |  |  |  |
| LUMO                                                                                | LUMO+1                                                                              | LUMO+2                                                                               | LUMO+3                                                                                |

**Table S32** Composition and energies of selected molecular orbitals of **4a**<sup>3+</sup> (*S*=3/2)

| MO             | Energy (eV) | % Composition |      |    |
|----------------|-------------|---------------|------|----|
|                |             | Ru            | acac | L  |
| $\alpha$ -spin |             |               |      |    |
| LUMO+5         | -8.594      | 34            | 58   | 8  |
| LUMO+4         | -8.645      | 27            | 63   | 10 |
| LUMO+3         | -8.864      | 14            | 64   | 22 |
| LUMO+2         | -8.984      | 6             | 26   | 68 |
| LUMO+1         | -9.164      | 25            | 64   | 12 |
| LUMO           | -12.008     | 53            | 26   | 21 |
| SOMO 1         | -13.230     | 30            | 55   | 15 |
| SOMO 2         | -13.469     | 27            | 38   | 35 |
| SOMO 3         | -13.836     | 4             | 70   | 26 |
| HOMO-3         | -13.953     | 23            | 35   | 42 |
| HOMO-4         | -13.991     | 20            | 32   | 48 |
| HOMO-5         | -14.139     | 4             | 2    | 94 |
| $\beta$ -spin  |             |               |      |    |
| LUMO+5         | -8.918      | 8             | 46   | 46 |
| LUMO+4         | -9.107      | 24            | 65   | 11 |
| LUMO+3         | -10.560     | 54            | 18   | 28 |
| LUMO+2         | -11.016     | 57            | 29   | 13 |
| LUMO+1         | -11.933     | 44            | 27   | 28 |
| LUMO           | -12.642     | 31            | 44   | 25 |
| HOMO           | -13.040     | 18            | 61   | 21 |
| HOMO-1         | -13.349     | 36            | 53   | 11 |
| HOMO-2         | -13.713     | 37            | 15   | 48 |
| HOMO-3         | -13.927     | 19            | 39   | 42 |
| HOMO-4         | -13.985     | 4             | 83   | 13 |
| HOMO-5         | -14.051     | 2             | 3    | 95 |

| $\alpha$ -spin                                                                      |                                                                                     |                                                                                      |                                                                                       |
|-------------------------------------------------------------------------------------|-------------------------------------------------------------------------------------|--------------------------------------------------------------------------------------|---------------------------------------------------------------------------------------|
| 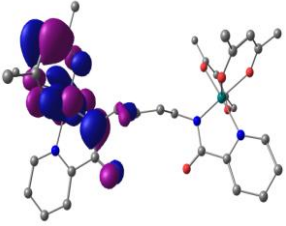   |    |    |    |
| SOMO 1                                                                              | SOMO 1                                                                              | SOMO 1                                                                               | HOMO-3                                                                                |
|    |    |    |    |
| LUMO                                                                                | LUMO+1                                                                              | LUMO+2                                                                               | LUMO+3                                                                                |
| $\beta$ -spin                                                                       |                                                                                     |                                                                                      |                                                                                       |
|  |  |  |  |
| HOMO                                                                                | HOMO-1                                                                              | HOMO-2                                                                               | HOMO-3                                                                                |
|  |  |  |  |
| LUMO                                                                                | LUMO+1                                                                              | LUMO+2                                                                               | LUMO+3                                                                                |

**Table S33** Composition and energies of selected molecular orbitals of **4a<sup>2+</sup>** (*S*=1)

| MO             | Energy (eV) | % Composition |      |    |
|----------------|-------------|---------------|------|----|
|                |             | Ru            | acac | L  |
| $\alpha$ -spin |             |               |      |    |
| LUMO+5         | -6.157      | 20            | 69   | 10 |
| LUMO+4         | -6.208      | 24            | 62   | 14 |
| LUMO+3         | -6.398      | 18            | 20   | 62 |
| LUMO+2         | -6.415      | 16            | 18   | 66 |
| LUMO+1         | -6.553      | 23            | 25   | 52 |
| LUMO           | -8.855      | 58            | 31   | 11 |
| SOMO 1         | -10.843     | 31            | 44   | 25 |
| SOMO 2         | -10.964     | 26            | 57   | 18 |
| HOMO-2         | -11.159     | 12            | 66   | 22 |
| HOMO-3         | -11.373     | 18            | 42   | 39 |
| HOMO-4         | -11.400     | 5             | 87   | 8  |
| HOMO-5         | -11.447     | 55            | 33   | 12 |
| $\beta$ -spin  |             |               |      |    |
| LUMO+5         | -6.175      | 19            | 56   | 25 |
| LUMO+4         | -6.305      | 9             | 27   | 65 |
| LUMO+3         | -6.357      | 8             | 27   | 65 |
| LUMO+2         | -8.331      | 53            | 17   | 31 |
| LUMO+1         | -8.846      | 49            | 13   | 13 |
| LUMO           | -9.096      | 62            | 25   | 13 |
| HOMO           | -10.954     | 23            | 69   | 7  |
| HOMO-1         | -11.049     | 10            | 72   | 18 |
| HOMO-2         | -11.247     | 15            | 72   | 13 |
| HOMO-3         | -11.277     | 18            | 71   | 11 |
| HOMO-4         | -11.513     | 44            | 15   | 41 |
| HOMO-5         | -11.597     | 56            | 17   | 28 |

| $\alpha$ -spin                                                                      |                                                                                     |                                                                                      |                                                                                       |
|-------------------------------------------------------------------------------------|-------------------------------------------------------------------------------------|--------------------------------------------------------------------------------------|---------------------------------------------------------------------------------------|
| 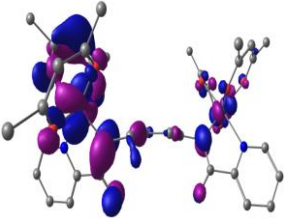   |    |    |    |
| SOMO 1                                                                              | SOMO 2                                                                              | HOMO-2                                                                               | HOMO-3                                                                                |
|    |    |    |    |
| LUMO                                                                                | LUMO+1                                                                              | LUMO+2                                                                               | LUMO+3                                                                                |
| $\beta$ -spin                                                                       |                                                                                     |                                                                                      |                                                                                       |
|  |  |  |  |
| HOMO                                                                                | HOMO-1                                                                              | HOMO-2                                                                               | HOMO-3                                                                                |
|  |  |  |  |
| LUMO                                                                                | LUMO+1                                                                              | LUMO+2                                                                               | LUMO+3                                                                                |

**Table S34** Composition and energies of selected molecular orbitals of **4a<sup>+</sup>** ( $S=1/2$ )

| MO             | Energy (eV) | % Composition |      |    |
|----------------|-------------|---------------|------|----|
|                |             | Ru            | acac | L  |
| $\alpha$ -spin |             |               |      |    |
| LUMO+5         | -3.565      | 4             | 92   | 4  |
| LUMO+4         | -3.650      | 9             | 85   | 6  |
| LUMO+3         | -3.683      | 9             | 85   | 6  |
| LUMO+2         | -3.948      | 3             | 5    | 93 |
| LUMO+1         | -3.976      | 3             | 3    | 94 |
| LUMO           | -7.188      | 51            | 35   | 14 |
| SOMO           | -7.553      | 51            | 34   | 15 |
| HOMO-1         | -8.306      | 36            | 26   | 39 |
| HOMO-2         | -8.408      | 40            | 34   | 26 |
| HOMO-3         | -8.605      | 22            | 64   | 14 |
| HOMO-4         | -8.673      | 25            | 53   | 23 |
| HOMO-5         | -8.890      | 51            | 32   | 17 |
| $\beta$ -spin  |             |               |      |    |
| LUMO+5         | -3.650      | 8             | 84   | 9  |
| LUMO+4         | -3.681      | 8             | 83   | 9  |
| LUMO+3         | -3.869      | 3             | 12   | 85 |
| LUMO+2         | -3.893      | 3             | 9    | 87 |
| LUMO+1         | -5.858      | 58            | 13   | 29 |
| LUMO           | -5.921      | 59            | 13   | 28 |
| HOMO           | -8.287      | 42            | 48   | 10 |
| HOMO-1         | -8.340      | 43            | 49   | 8  |
| HOMO-2         | -8.535      | 44            | 40   | 16 |
| HOMO-3         | -8.590      | 45            | 43   | 12 |
| HOMO-4         | -8.811      | 41            | 26   | 33 |
| HOMO-5         | -8.851      | 40            | 26   | 34 |

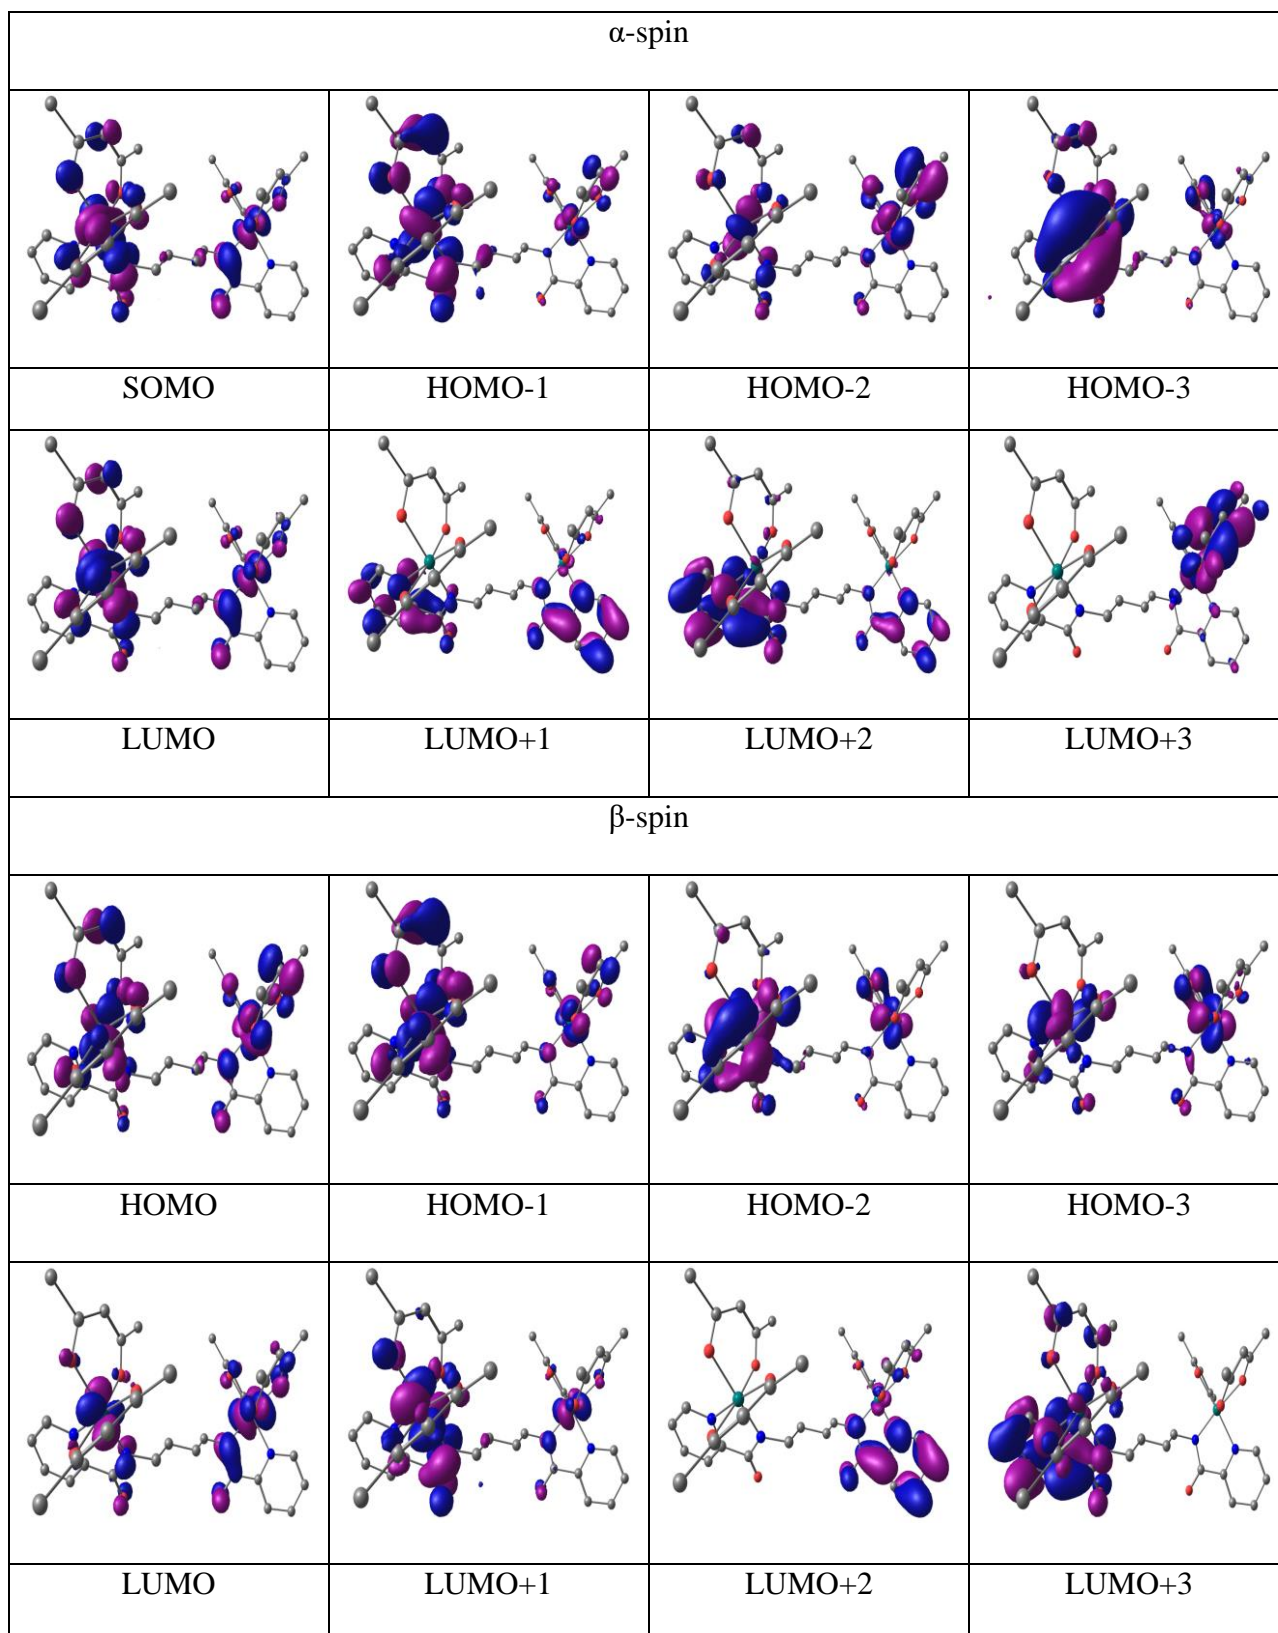

**Table S35** Composition and energies of selected molecular orbitals of **4a** ( $S=1$ )

| MO             | Energy (eV) | % Composition |      |    |
|----------------|-------------|---------------|------|----|
|                |             | Ru            | acac | L  |
| $\alpha$ -spin |             |               |      |    |
| LUMO+5         | -0.859      | 5             | 91   | 4  |
| LUMO+4         | -0.876      | 4             | 93   | 3  |
| LUMO+3         | -1.072      | 6             | 11   | 83 |
| LUMO+2         | -1.250      | 5             | 3    | 92 |
| LUMO+1         | -1.324      | 4             | 84   | 12 |
| LUMO           | -1.537      | 3             | 2    | 96 |
| SOMO 1         | -4.817      | 28            | 7    | 65 |
| SOMO 2         | -5.067      | 37            | 13   | 50 |
| HOMO-2         | -5.212      | 54            | 40   | 6  |
| HOMO-3         | -5.215      | 54            | 39   | 6  |
| HOMO-4         | -5.472      | 62            | 25   | 13 |
| HOMO-5         | -5.594      | 18            | 4    | 78 |
| $\beta$ -spin  |             |               |      |    |
| LUMO+5         | -1.042      | 7             | 13   | 80 |
| LUMO+4         | -1.246      | 6             | 3    | 91 |
| LUMO+3         | -1.320      | 4             | 82   | 14 |
| LUMO+2         | -1.429      | 4             | 4    | 92 |
| LUMO+1         | -2.215      | 65            | 19   | 16 |
| LUMO           | -2.523      | 60            | 21   | 19 |
| HOMO           | -4.744      | 42            | 20   | 38 |
| HOMO-1         | -4.864      | 54            | 24   | 22 |
| HOMO-2         | -5.158      | 64            | 22   | 13 |
| HOMO-3         | -5.352      | 49            | 18   | 33 |
| HOMO-4         | -5.445      | 36            | 11   | 53 |
| HOMO-5         | -5.554      | 19            | 19   | 62 |



| $\alpha$ -spin                                                                      |                                                                                     |                                                                                      |                                                                                       |
|-------------------------------------------------------------------------------------|-------------------------------------------------------------------------------------|--------------------------------------------------------------------------------------|---------------------------------------------------------------------------------------|
| 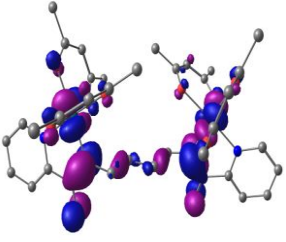   |    |    |    |
| SOMO 1                                                                              | SOMO 2                                                                              | HOMO-2                                                                               | HOMO-3                                                                                |
|    |    |    |    |
| LUMO                                                                                | LUMO+1                                                                              | LUMO+2                                                                               | LUMO+3                                                                                |
| $\beta$ -spin                                                                       |                                                                                     |                                                                                      |                                                                                       |
|  |  |  |  |
| HOMO                                                                                | HOMO-1                                                                              | HOMO-2                                                                               | HOMO-3                                                                                |
|  |  |  |  |
| LUMO                                                                                | LUMO+1                                                                              | LUMO+2                                                                               | LUMO+3                                                                                |

**Table S36** Composition and energies of selected molecular orbitals of **4a**<sup>2-</sup> (*S*=0)

| MO     | Energy (eV) | % Composition |      |    |
|--------|-------------|---------------|------|----|
|        |             | Ru            | acac | L  |
| LUMO+5 | 4.260       | 6             | 86   | 7  |
| LUMO+4 | 4.242       | 5             | 89   | 6  |
| LUMO+3 | 4.140       | 3             | 4    | 93 |
| LUMO+2 | 4.126       | 2             | 5    | 93 |
| LUMO+1 | 3.701       | 7             | 7    | 86 |
| LUMO   | 3.689       | 7             | 6    | 87 |
| HOMO   | 1.348       | 60            | 12   | 28 |
| HOMO-1 | 1.311       | 63            | 12   | 25 |
| HOMO-2 | 0.735       | 70            | 18   | 12 |
| HOMO-3 | 0.724       | 71            | 18   | 11 |
| HOMO-4 | 0.559       | 76            | 16   | 9  |
| HOMO-5 | 0.537       | 76            | 15   | 8  |

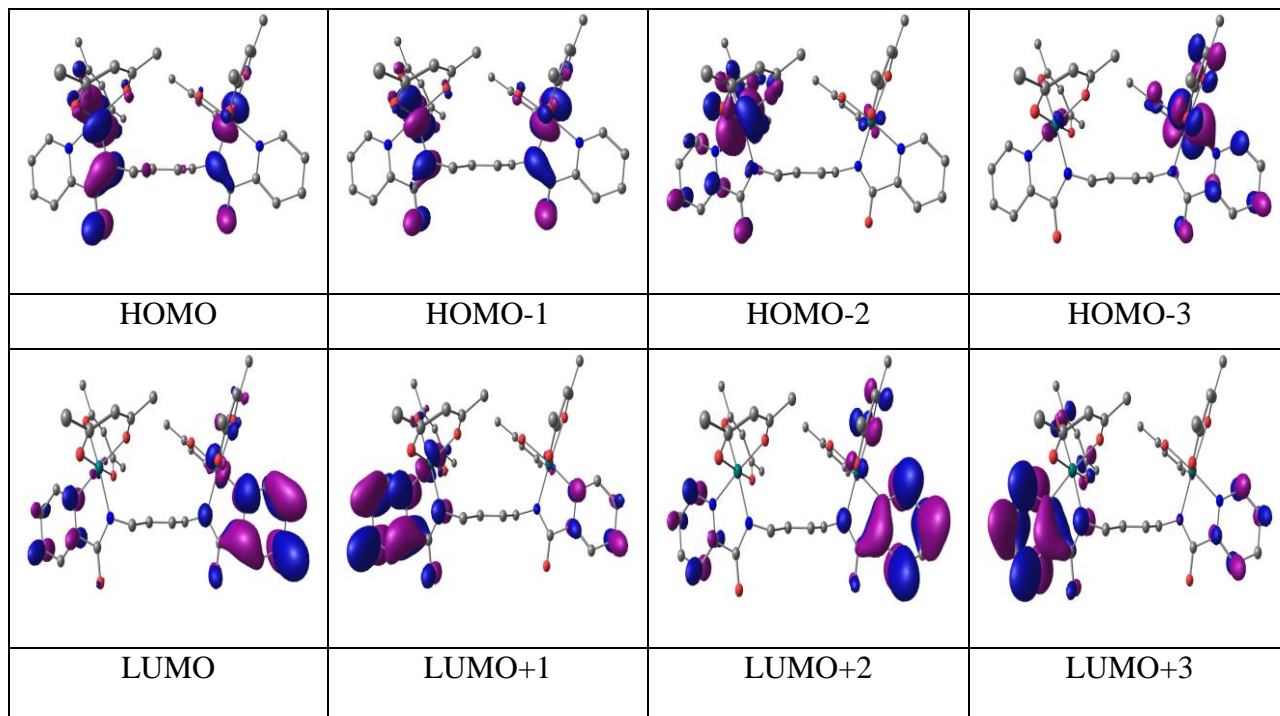

**Table S37** Composition and energies of selected molecular orbitals of  $5^{2+}$  ( $S=1$ )

| MO             | Energy (eV) | % Composition |      |    |
|----------------|-------------|---------------|------|----|
|                |             | Ru            | acac | L  |
| $\alpha$ -spin |             |               |      |    |
| LUMO+5         | -5.808      | 7             | 88   | 5  |
| LUMO+4         | -5.812      | 7             | 82   | 11 |
| LUMO+3         | -5.838      | 3             | 7    | 90 |
| LUMO+2         | -5.838      | 2             | 1    | 97 |
| LUMO+1         | -7.161      | 8             | 2    | 90 |
| LUMO           | -7.167      | 8             | 2    | 90 |
| SOMO 1         | -10.318     | 25            | 72   | 2  |
| SOMO 2         | -10.320     | 25            | 72   | 3  |
| HOMO-2         | -10.876     | 48            | 44   | 8  |
| HOMO-3         | -10.878     | 48            | 43   | 9  |
| HOMO-4         | -11.066     | 34            | 59   | 7  |
| HOMO-5         | -11.073     | 34            | 60   | 6  |
| $\beta$ -spin  |             |               |      |    |
| LUMO+5         | -5.801      | 4             | 1    | 95 |
| LUMO+4         | -5.804      | 4             | 5    | 91 |
| LUMO+3         | -7.146      | 9             | 3    | 88 |
| LUMO+2         | -7.152      | 9             | 3    | 88 |
| LUMO+1         | -7.951      | 61            | 32   | 7  |
| LUMO           | -7.951      | 62            | 32   | 6  |
| HOMO           | -10.498     | 23            | 71   | 5  |
| HOMO-1         | -10.500     | 23            | 71   | 6  |
| HOMO-2         | -10.642     | 66            | 25   | 10 |
| HOMO-3         | -10.643     | 66            | 24   | 10 |
| HOMO-4         | -10.782     | 55            | 39   | 7  |
| HOMO-5         | -10.799     | 55            | 38   | 7  |

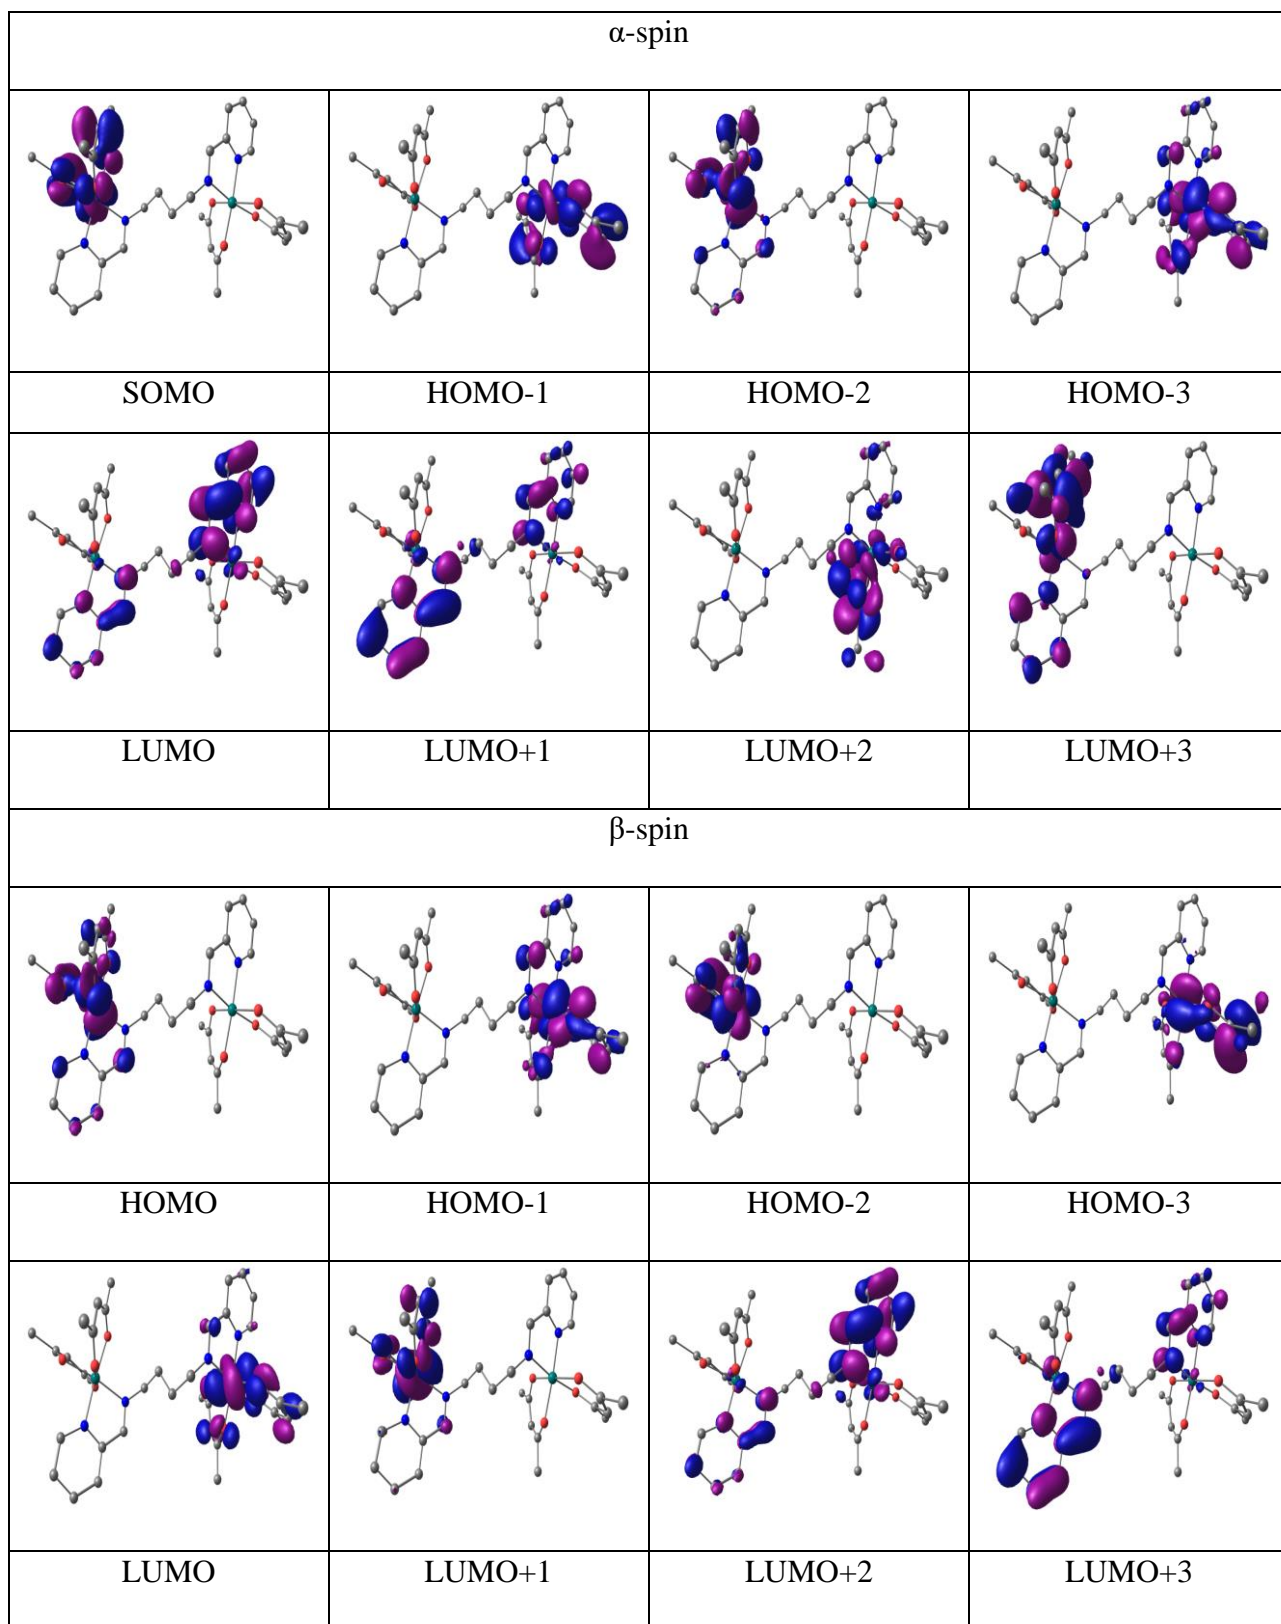

**Table S38** Composition and energies of selected molecular orbitals of **5** ( $S=0$ )

| MO     | Energy (eV) | % Composition |      |    |
|--------|-------------|---------------|------|----|
|        |             | Ru            | acac | L  |
| LUMO+5 | -0.422      | 4             | 92   | 4  |
| LUMO+4 | -0.462      | 4             | 92   | 4  |
| LUMO+3 | -0.722      | 4             | 1    | 95 |
| LUMO+2 | -0.754      | 4             | 2    | 94 |
| LUMO+1 | -1.714      | 12            | 4    | 83 |
| LUMO   | -1.751      | 13            | 4    | 83 |
| HOMO   | -3.831      | 63            | 32   | 5  |
| HOMO-1 | -3.866      | 63            | 32   | 5  |
| HOMO-2 | -4.480      | 68            | 17   | 15 |
| HOMO-3 | -4.514      | 68            | 17   | 15 |
| HOMO-4 | -4.619      | 78            | 15   | 7  |
| HOMO-5 | -4.650      | 78            | 16   | 6  |

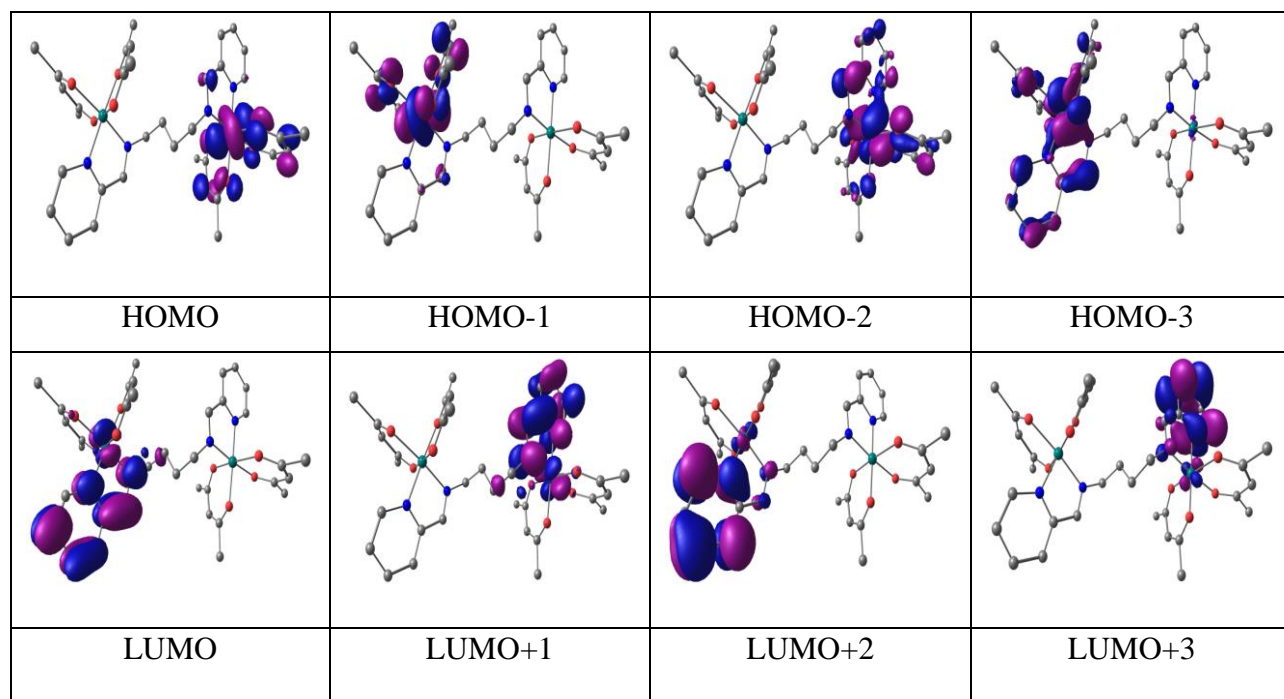

**Table S39** Composition and energies of selected molecular orbitals of  $5^-$  ( $S=1/2$ )

| MO             | Energy (eV) | % Composition |      |    |
|----------------|-------------|---------------|------|----|
|                |             | Ru            | acac | L  |
| $\alpha$ -spin |             |               |      |    |
| LUMO+5         | 2,057       | 6             | 73   | 21 |
| LUMO+4         | 2.042       | 5             | 44   | 52 |
| LUMO+3         | 1.998       | 5             | 44   | 51 |
| LUMO+2         | 1.951       | 3             | 79   | 18 |
| LUMO+1         | 1.918       | 3             | 75   | 23 |
| LUMO           | 0.581       | 13            | 4    | 83 |
| SOMO           | 0.204       | 13            | 4    | 82 |
| HOMO-1         | -1.561      | 72            | 22   | 6  |
| HOMO-2         | -1.605      | 71            | 22   | 6  |
| HOMO-3         | -2.022      | 75            | 16   | 9  |
| HOMO-4         | -2.037      | 70            | 16   | 14 |
| HOMO-5         | -2.062      | 77            | 15   | 8  |
| $\beta$ -spin  |             |               |      |    |
| LUMO+5         | 2.088       | 5             | 72   | 22 |
| LUMO+4         | 2.044       | 5             | 59   | 35 |
| LUMO+3         | 1.975       | 4             | 85   | 12 |
| LUMO+2         | 1.943       | 3             | 83   | 14 |
| LUMO+1         | 1.339       | 10            | 9    | 81 |
| LUMO           | 1.270       | 10            | 8    | 82 |
| HOMO           | -1.538      | 71            | 21   | 7  |
| HOMO-1         | -1.584      | 71            | 22   | 7  |
| HOMO-2         | -1.876      | 70            | 16   | 14 |
| HOMO-3         | -1.927      | 70            | 16   | 14 |
| HOMO-4         | -2.006      | 78            | 15   | 8  |
| HOMO-5         | -2.044      | 78            | 15   | 7  |

| $\alpha$ -spin                                                                      |                                                                                     |                                                                                      |                                                                                       |
|-------------------------------------------------------------------------------------|-------------------------------------------------------------------------------------|--------------------------------------------------------------------------------------|---------------------------------------------------------------------------------------|
| 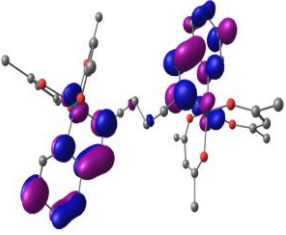   |    |    |    |
| SOMO                                                                                | HOMO-1                                                                              | HOMO-2                                                                               | HOMO-3                                                                                |
|    |    |    |    |
| LUMO                                                                                | LUMO+1                                                                              | LUMO+2                                                                               | LUMO+3                                                                                |
| $\beta$ -spin                                                                       |                                                                                     |                                                                                      |                                                                                       |
|  |  |  |  |
| HOMO                                                                                | HOMO-1                                                                              | HOMO-2                                                                               | HOMO-3                                                                                |
|  |  |  |  |
| LUMO                                                                                | LUMO+1                                                                              | LUMO+2                                                                               | LUMO+3                                                                                |

**Table S40** Composition and energies of selected molecular orbitals of  $5^{2-}$  ( $S=1$ )

| MO             | Energy (eV) | % Composition |      |    |
|----------------|-------------|---------------|------|----|
|                |             | Ru            | acac | L  |
| $\alpha$ -spin |             |               |      |    |
| LUMO+5         | 4.855       | 10            | 2    | 88 |
| LUMO+4         | 4.823       | 9             | 2    | 89 |
| LUMO+3         | 4.431       | 5             | 91   | 3  |
| LUMO+2         | 4.411       | 6             | 91   | 3  |
| LUMO+1         | 4.236       | 4             | 93   | 3  |
| LUMO           | 4.221       | 4             | 93   | 3  |
| SOMO 1         | 2.469       | 12            | 4    | 84 |
| SOMO 2         | 2.397       | 13            | 4    | 83 |
| HOMO-2         | 1.020       | 76            | 18   | 7  |
| HOMO-3         | 1.009       | 75            | 18   | 7  |
| HOMO-4         | 0.620       | 79            | 15   | 7  |
| HOMO-5         | 0.596       | 79            | 15   | 7  |
| $\beta$ -spin  |             |               |      |    |
| LUMO+5         | 4.502       | 8             | 75   | 17 |
| LUMO+4         | 4.499       | 10            | 67   | 24 |
| LUMO+3         | 4.341       | 8             | 66   | 26 |
| LUMO+2         | 4.318       | 8             | 66   | 25 |
| LUMO+1         | 4.153       | 2             | 67   | 32 |
| LUMO           | 4.122       | 3             | 58   | 40 |
| HOMO           | 1.086       | 74            | 16   | 9  |
| HOMO-1         | 1.070       | 74            | 17   | 9  |
| HOMO-2         | 0.820       | 74            | 15   | 11 |
| HOMO-3         | 0.802       | 74            | 15   | 11 |
| HOMO-4         | 0.661       | 78            | 15   | 7  |
| HOMO-5         | 0.637       | 78            | 15   | 7  |



| $\alpha$ -spin                                                                      |                                                                                     |                                                                                      |                                                                                       |
|-------------------------------------------------------------------------------------|-------------------------------------------------------------------------------------|--------------------------------------------------------------------------------------|---------------------------------------------------------------------------------------|
| 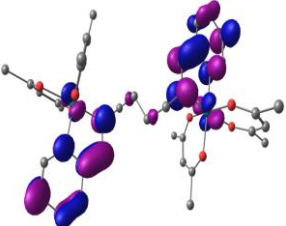   |    |    |    |
| SOMO 1                                                                              | SOMO 2                                                                              | HOMO-2                                                                               | HOMO-3                                                                                |
|    |    |    |    |
| LUMO                                                                                | LUMO+1                                                                              | LUMO+2                                                                               | LUMO+3                                                                                |
| $\beta$ -spin                                                                       |                                                                                     |                                                                                      |                                                                                       |
|  |  |  |  |
| HOMO                                                                                | HOMO-1                                                                              | HOMO-2                                                                               | HOMO-3                                                                                |
|  |  |  |  |
| LUMO                                                                                | LUMO+1                                                                              | LUMO+2                                                                               | LUMO+3                                                                                |

**Table S41** Composition and energies of selected molecular orbitals of **5a<sup>4+</sup>** (*S*=1)

| MO             | Energy (eV) | % Composition |      |    |
|----------------|-------------|---------------|------|----|
|                |             | Ru            | acac | L  |
| $\alpha$ -spin |             |               |      |    |
| LUMO+5         | -11.203     | 14            | 43   | 44 |
| LUMO+4         | -11.223     | 14            | 39   | 47 |
| LUMO+3         | -11.323     | 32            | 56   | 12 |
| LUMO+2         | -11.336     | 33            | 55   | 12 |
| LUMO+1         | -14.394     | 45            | 41   | 14 |
| LUMO           | -14.442     | 45            | 43   | 11 |
| SOMO 1         | -16.125     | 18            | 42   | 40 |
| SOMO 2         | -16.272     | 26            | 46   | 28 |
| HOMO-2         | -16.469     | 21            | 71   | 7  |
| HOMO-3         | -16.482     | 22            | 71   | 7  |
| HOMO-4         | -16.740     | 3             | 2    | 95 |
| HOMO-5         | -16.767     | 3             | 2    | 95 |
| $\beta$ -spin  |             |               |      |    |
| LUMO+5         | -11.277     | 21            | 70   | 9  |
| LUMO+4         | -11.289     | 21            | 70   | 9  |
| LUMO+3         | -13.984     | 38            | 11   | 51 |
| LUMO+2         | -14.178     | 44            | 13   | 43 |
| LUMO+1         | -14.320     | 45            | 51   | 4  |
| LUMO           | -14.332     | 45            | 50   | 4  |
| HOMO           | -16.256     | 25            | 68   | 7  |
| HOMO-1         | -16.274     | 25            | 68   | 6  |
| HOMO-2         | -16.420     | 21            | 50   | 30 |
| HOMO-3         | -16.534     | 16            | 54   | 30 |
| HOMO-4         | -16.668     | 9             | 5    | 86 |
| HOMO-5         | -16.700     | 4             | 2    | 94 |

| $\alpha$ -spin                                                                      |                                                                                     |                                                                                      |                                                                                       |
|-------------------------------------------------------------------------------------|-------------------------------------------------------------------------------------|--------------------------------------------------------------------------------------|---------------------------------------------------------------------------------------|
| 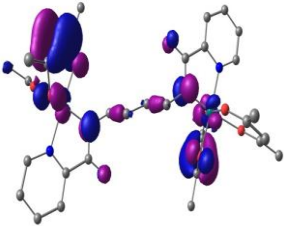   |    |    |    |
| SOMO 1                                                                              | SOMO 2                                                                              | HOMO-2                                                                               | HOMO-3                                                                                |
|    |    |    |    |
| LUMO                                                                                | LUMO+1                                                                              | LUMO+2                                                                               | LUMO+3                                                                                |
| $\beta$ -spin                                                                       |                                                                                     |                                                                                      |                                                                                       |
|  |  |  |  |
| HOMO                                                                                | HOMO-1                                                                              | HOMO-2                                                                               | HOMO-3                                                                                |
|  |  |  |  |
| LUMO                                                                                | LUMO+1                                                                              | LUMO+2                                                                               | LUMO+3                                                                                |

**Table S42** Composition and energies of selected molecular orbitals of **5a<sup>3+</sup>** (*S*=3/2)

| MO             | Energy (eV) | % Composition |      |    |
|----------------|-------------|---------------|------|----|
|                |             | Ru            | acac | L  |
| $\alpha$ -spin |             |               |      |    |
| LUMO+5         | -8.769      | 21            | 59   | 19 |
| LUMO+4         | -8.785      | 9             | 84   | 7  |
| LUMO+3         | -8.922      | 40            | 49   | 11 |
| LUMO+2         | -9.092      | 6             | 20   | 74 |
| LUMO+1         | -9.311      | 24            | 56   | 20 |
| LUMO           | -11.983     | 49            | 24   | 27 |
| SOMO 1         | -13.344     | 33            | 46   | 21 |
| SOMO 2         | -13.619     | 25            | 42   | 33 |
| SOMO 3         | -13.978     | 2             | 82   | 15 |
| HOMO-3         | -14.050     | 9             | 69   | 22 |
| HOMO-4         | -14.185     | 45            | 15   | 39 |
| HOMO-5         | -14.337     | 26            | 67   | 7  |
| $\beta$ -spin  |             |               |      |    |
| LUMO+5         | -9.029      | 8             | 61   | 67 |
| LUMO+4         | -9.243      | 22            | 25   | 26 |
| LUMO+3         | -10.693     | 56            | 52   | 23 |
| LUMO+2         | -11.179     | 56            | 29   | 15 |
| LUMO+1         | -11.852     | 47            | 24   | 29 |
| LUMO           | -12.822     | 31            | 54   | 14 |
| HOMO           | -13.159     | 16            | 72   | 12 |
| HOMO-1         | -13.484     | 37            | 46   | 17 |
| HOMO-2         | -13.884     | 56            | 17   | 27 |
| HOMO-3         | -14.027     | 6             | 67   | 27 |
| HOMO-4         | -14.088     | 13            | 48   | 38 |
| HOMO-5         | -14.288     | 5             | 7    | 88 |

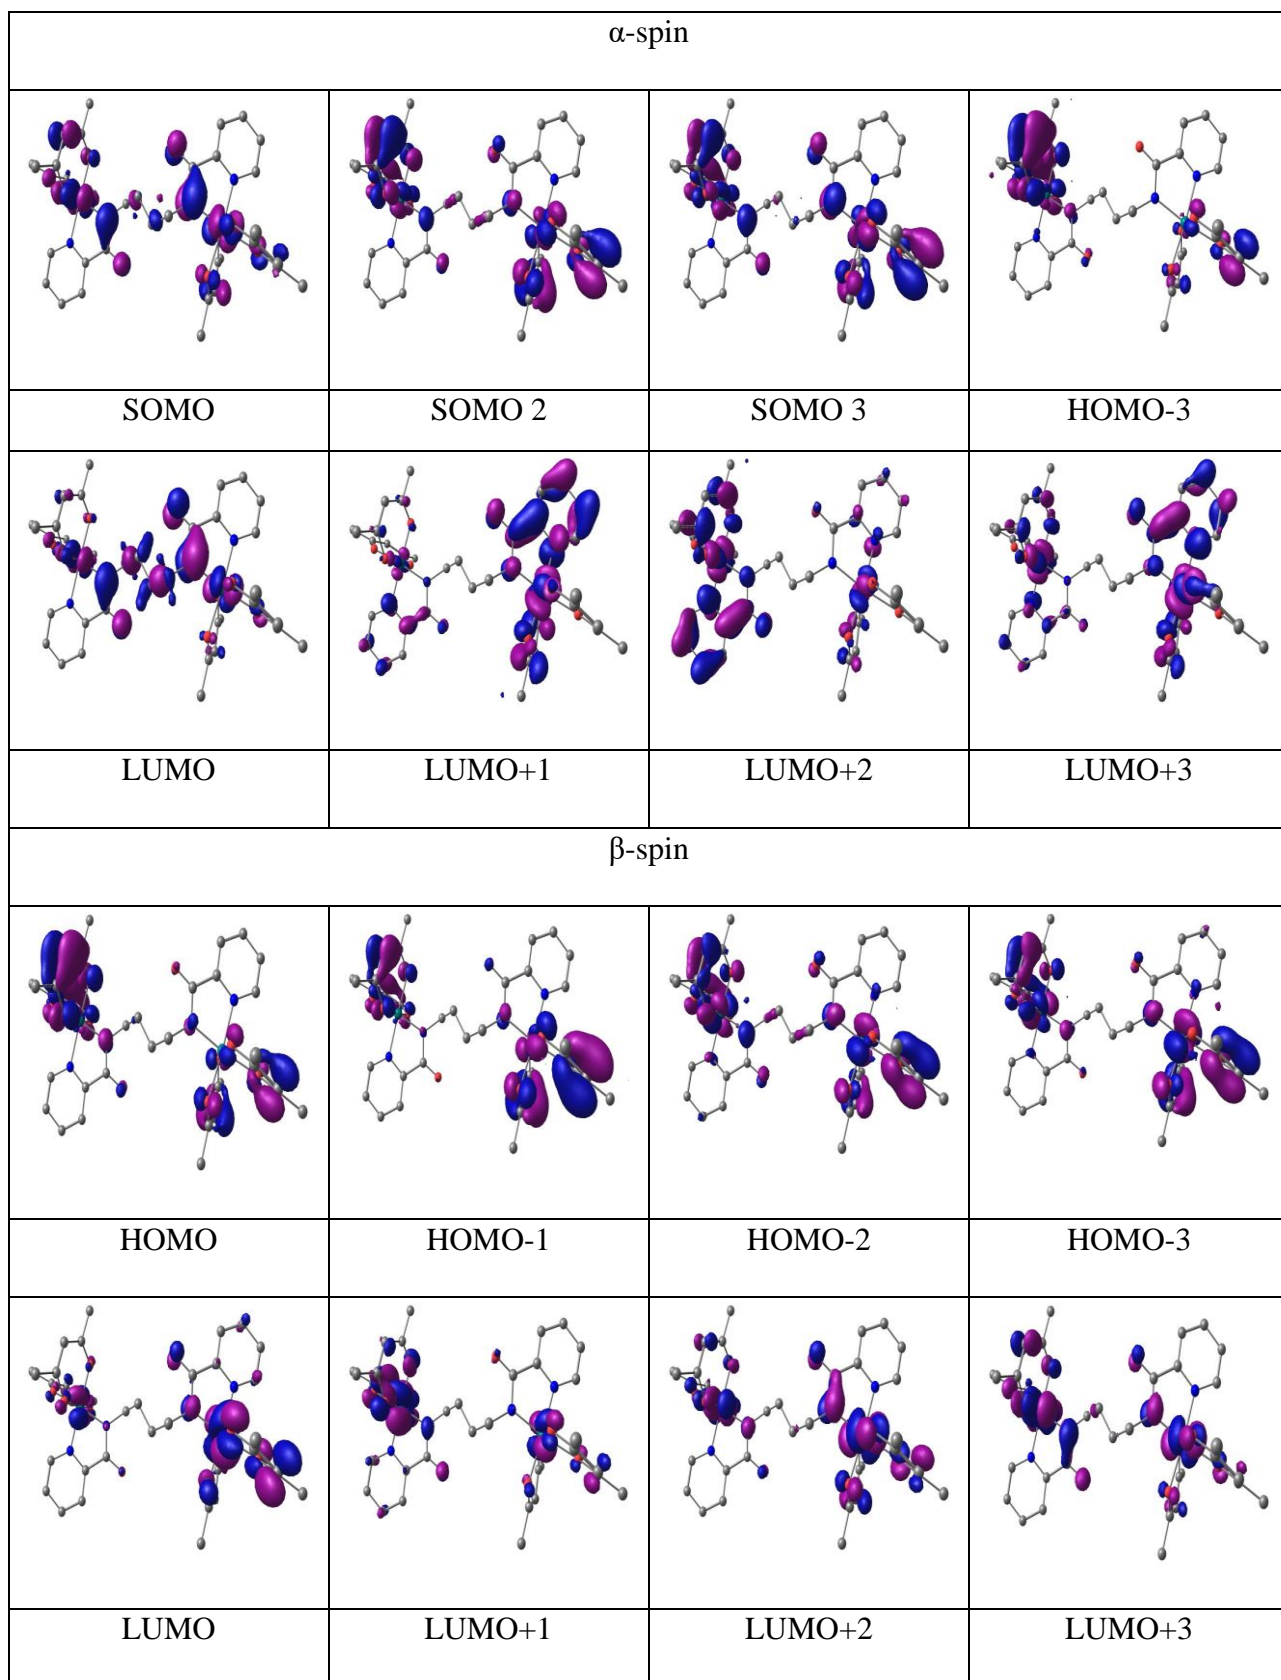

**Table S43** Composition and energies of selected molecular orbitals of **5a<sup>2+</sup>** (*S*=1)

| MO             | Energy (eV) | % Composition |      |    |
|----------------|-------------|---------------|------|----|
|                |             | Ru            | acac | L  |
| $\alpha$ -spin |             |               |      |    |
| LUMO+5         | -6.084      | 15            | 78   | 7  |
| LUMO+4         | -6.278      | 20            | 66   | 14 |
| LUMO+3         | -6.308      | 4             | 7    | 89 |
| LUMO+2         | -6.532      | 48            | 44   | 8  |
| LUMO+1         | -6.660      | 3             | 3    | 95 |
| LUMO           | -8.889      | 52            | 24   | 24 |
| SOMO 1         | -10.751     | 34            | 51   | 15 |
| SOMO 2         | -11.076     | 25            | 61   | 13 |
| HOMO-2         | -11.142     | 3             | 84   | 13 |
| HOMO-3         | -11.420     | 60            | 23   | 17 |
| HOMO-4         | -11.473     | 20            | 44   | 35 |
| HOMO-5         | -11.529     | 7             | 67   | 26 |
| $\beta$ -spin  |             |               |      |    |
| LUMO+5         | -6.225      | 25            | 70   | 5  |
| LUMO+4         | -6.308      | 4             | 8    | 89 |
| LUMO+3         | -6.493      | 4             | 9    | 87 |
| LUMO+2         | -8.646      | 57            | 21   | 22 |
| LUMO+1         | -8.888      | 52            | 24   | 23 |
| LUMO           | -9.217      | 58            | 26   | 16 |
| HOMO           | -10.751     | 34            | 51   | 15 |
| HOMO-1         | -11.138     | 3             | 82   | 14 |
| HOMO-2         | -11.154     | 4             | 82   | 13 |
| HOMO-3         | -11.353     | 31            | 54   | 15 |
| HOMO-4         | -11.423     | 62            | 23   | 15 |
| HOMO-5         | -11.698     | 46            | 27   | 27 |

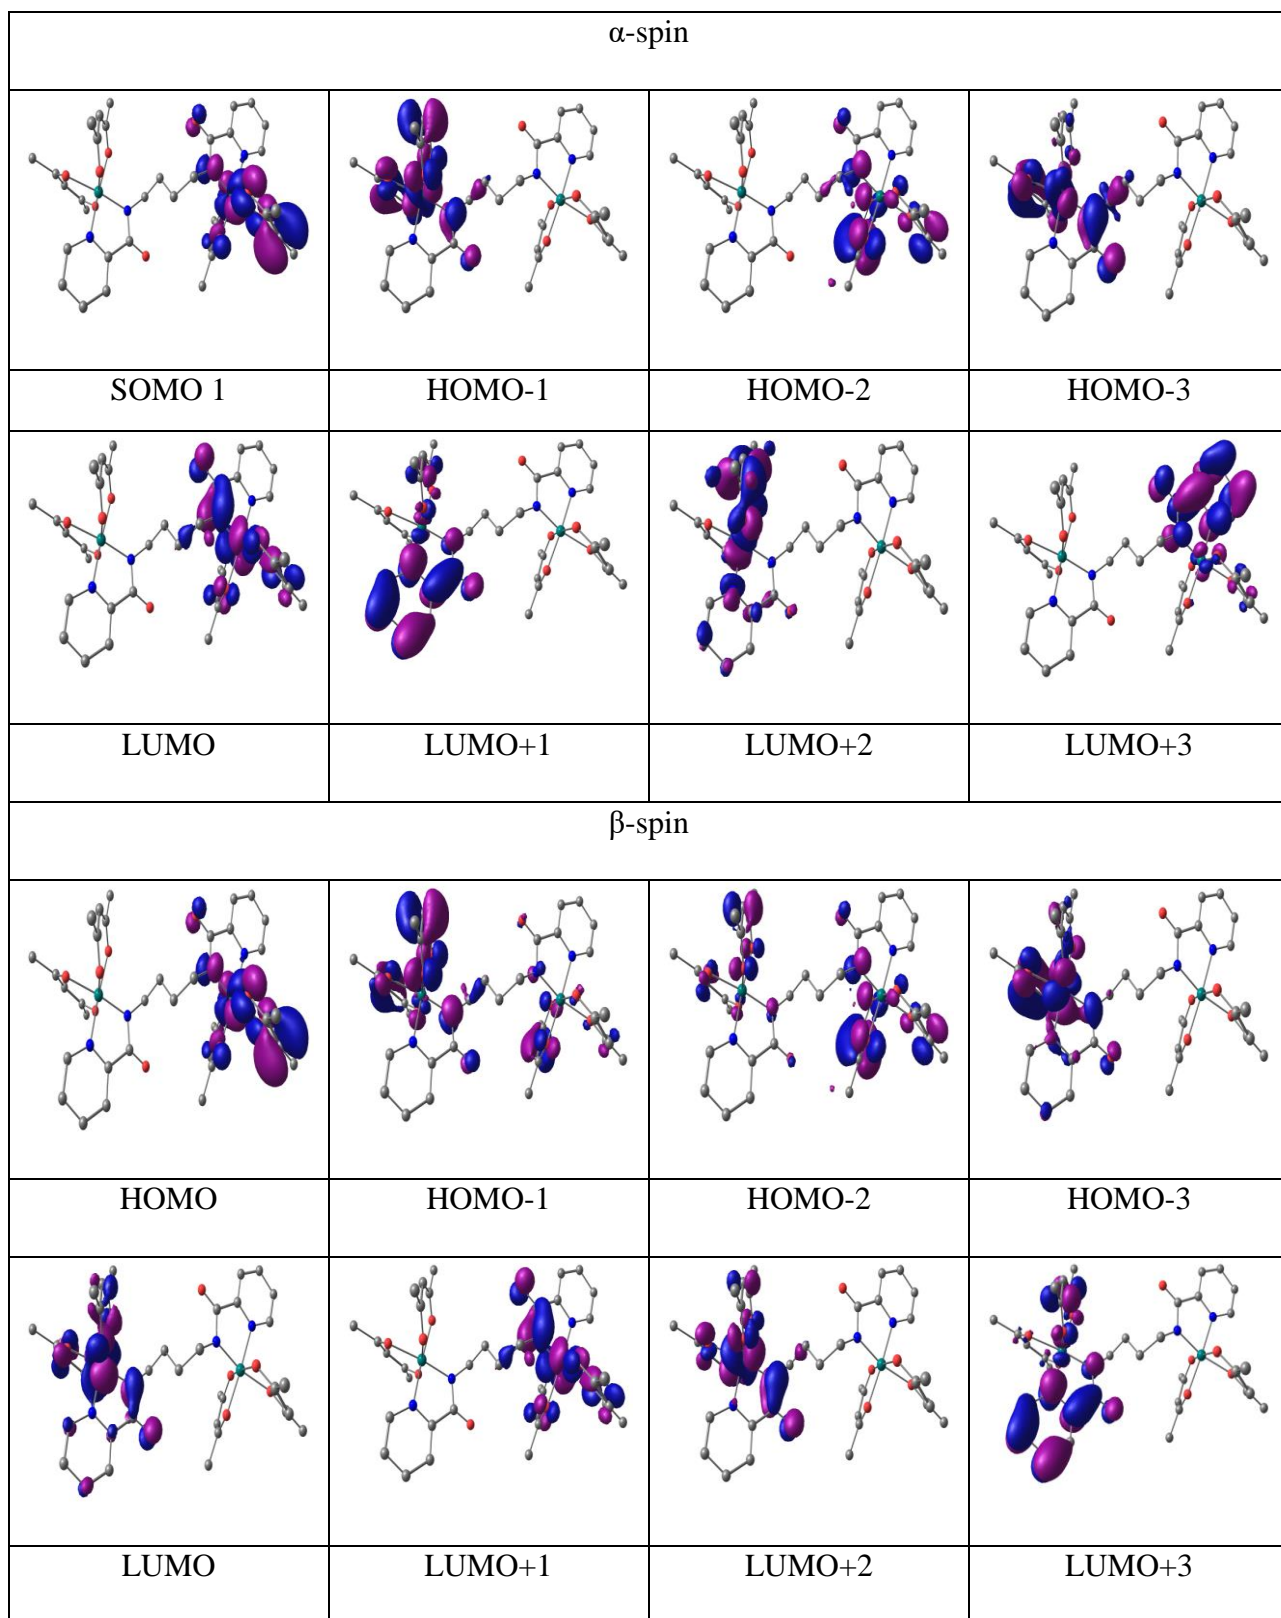

**Table S44** Composition and energies of selected molecular orbitals of **5a<sup>+</sup>** (*S*=1/2)

| MO             | Energy (eV) | % Composition |      |    |
|----------------|-------------|---------------|------|----|
|                |             | Ru            | acac | L  |
| $\alpha$ -spin |             |               |      |    |
| LUMO+5         | -3.369      | 3             | 76   | 21 |
| LUMO+4         | -3.463      | 15            | 80   | 6  |
| LUMO+3         | -3.524      | 12            | 83   | 6  |
| LUMO+2         | -3.921      | 3             | 3    | 94 |
| LUMO+1         | -4.006      | 3             | 2    | 94 |
| LUMO           | -5.884      | 66            | 22   | 13 |
| SOMO           | -8.056      | 35            | 39   | 27 |
| HOMO-1         | -8.231      | 42            | 40   | 19 |
| HOMO-2         | -8.350      | 32            | 45   | 23 |
| HOMO-3         | -8.558      | 13            | 75   | 12 |
| HOMO-4         | -8.592      | 11            | 73   | 16 |
| HOMO-5         | -8.719      | 57            | 31   | 12 |
| $\beta$ -spin  |             |               |      |    |
| LUMO+5         | -3.383      | 8             | 86   | 6  |
| LUMO+4         | -3.562      | 16            | 77   | 7  |
| LUMO+3         | -3.827      | 4             | 5    | 91 |
| LUMO+2         | -3.959      | 4             | 3    | 93 |
| LUMO+1         | -5.411      | 64            | 17   | 19 |
| LUMO           | -7.000      | 48            | 20   | 32 |
| HOMO           | -7.399      | 52            | 24   | 24 |
| HOMO-1         | -8.307      | 30            | 64   | 6  |
| HOMO-2         | -8.321      | 34            | 52   | 14 |
| HOMO-3         | -8.492      | 41            | 48   | 12 |
| HOMO-4         | -8.594      | 7             | 76   | 17 |
| HOMO-5         | -8.766      | 39            | 36   | 25 |



| $\alpha$ -spin                                                                      |                                                                                     |                                                                                      |                                                                                       |
|-------------------------------------------------------------------------------------|-------------------------------------------------------------------------------------|--------------------------------------------------------------------------------------|---------------------------------------------------------------------------------------|
| 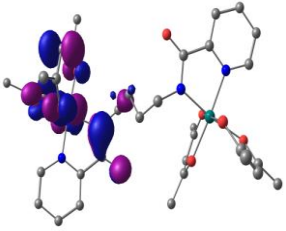   |    |    |    |
| SOMO                                                                                | HOMO-1                                                                              | HOMO-2                                                                               | HOMO-3                                                                                |
|    |    |    |    |
| LUMO                                                                                | LUMO+1                                                                              | LUMO+2                                                                               | LUMO+3                                                                                |
| $\beta$ -spin                                                                       |                                                                                     |                                                                                      |                                                                                       |
|  |  |  |  |
| HOMO                                                                                | HOMO-1                                                                              | HOMO-2                                                                               | HOMO-3                                                                                |
|  |  |  |  |
| LUMO                                                                                | LUMO+1                                                                              | LUMO+2                                                                               | LUMO+3                                                                                |

**Table S45** Composition and energies of selected molecular orbitals of **5a** ( $S=1$ )

| MO             | Energy (eV) | % Composition |      |    |
|----------------|-------------|---------------|------|----|
|                |             | Ru            | acac | L  |
| $\alpha$ -spin |             |               |      |    |
| LUMO+5         | -0.704      | 4             | 93   | 3  |
| LUMO+4         | -0.841      | 3             | 92   | 5  |
| LUMO+3         | -0.865      | 4             | 93   | 3  |
| LUMO+2         | -1.012      | 5             | 89   | 6  |
| LUMO+1         | -1.265      | 16            | 8    | 76 |
| LUMO           | -1.437      | 4             | 4    | 92 |
| SOMO 1         | -5.143      | 22            | 6    | 72 |
| SOMO 2         | -5.275      | 33            | 15   | 52 |
| HOMO-2         | -5.321      | 41            | 47   | 12 |
| HOMO-3         | -5.390      | 49            | 43   | 8  |
| HOMO-4         | -5.562      | 30            | 15   | 55 |
| HOMO-5         | -5.782      | 41            | 24   | 35 |
| $\beta$ -spin  |             |               |      |    |
| LUMO+5         | -0.809      | 5             | 80   | 15 |
| LUMO+4         | -0.991      | 5             | 88   | 7  |
| LUMO+3         | -1.026      | 15            | 22   | 63 |
| LUMO+2         | -1.379      | 4             | 6    | 90 |
| LUMO+1         | -2.618      | 64            | 17   | 19 |
| LUMO           | -2.795      | 62            | 13   | 25 |
| HOMO           | -4.943      | 40            | 18   | 42 |
| HOMO-1         | -5.072      | 51            | 25   | 24 |
| HOMO-2         | -5.279      | 34            | 19   | 47 |
| HOMO-3         | -5.544      | 60            | 18   | 23 |
| HOMO-4         | -5.575      | 50            | 29   | 21 |
| HOMO-5         | -5.898      | 23            | 46   | 31 |

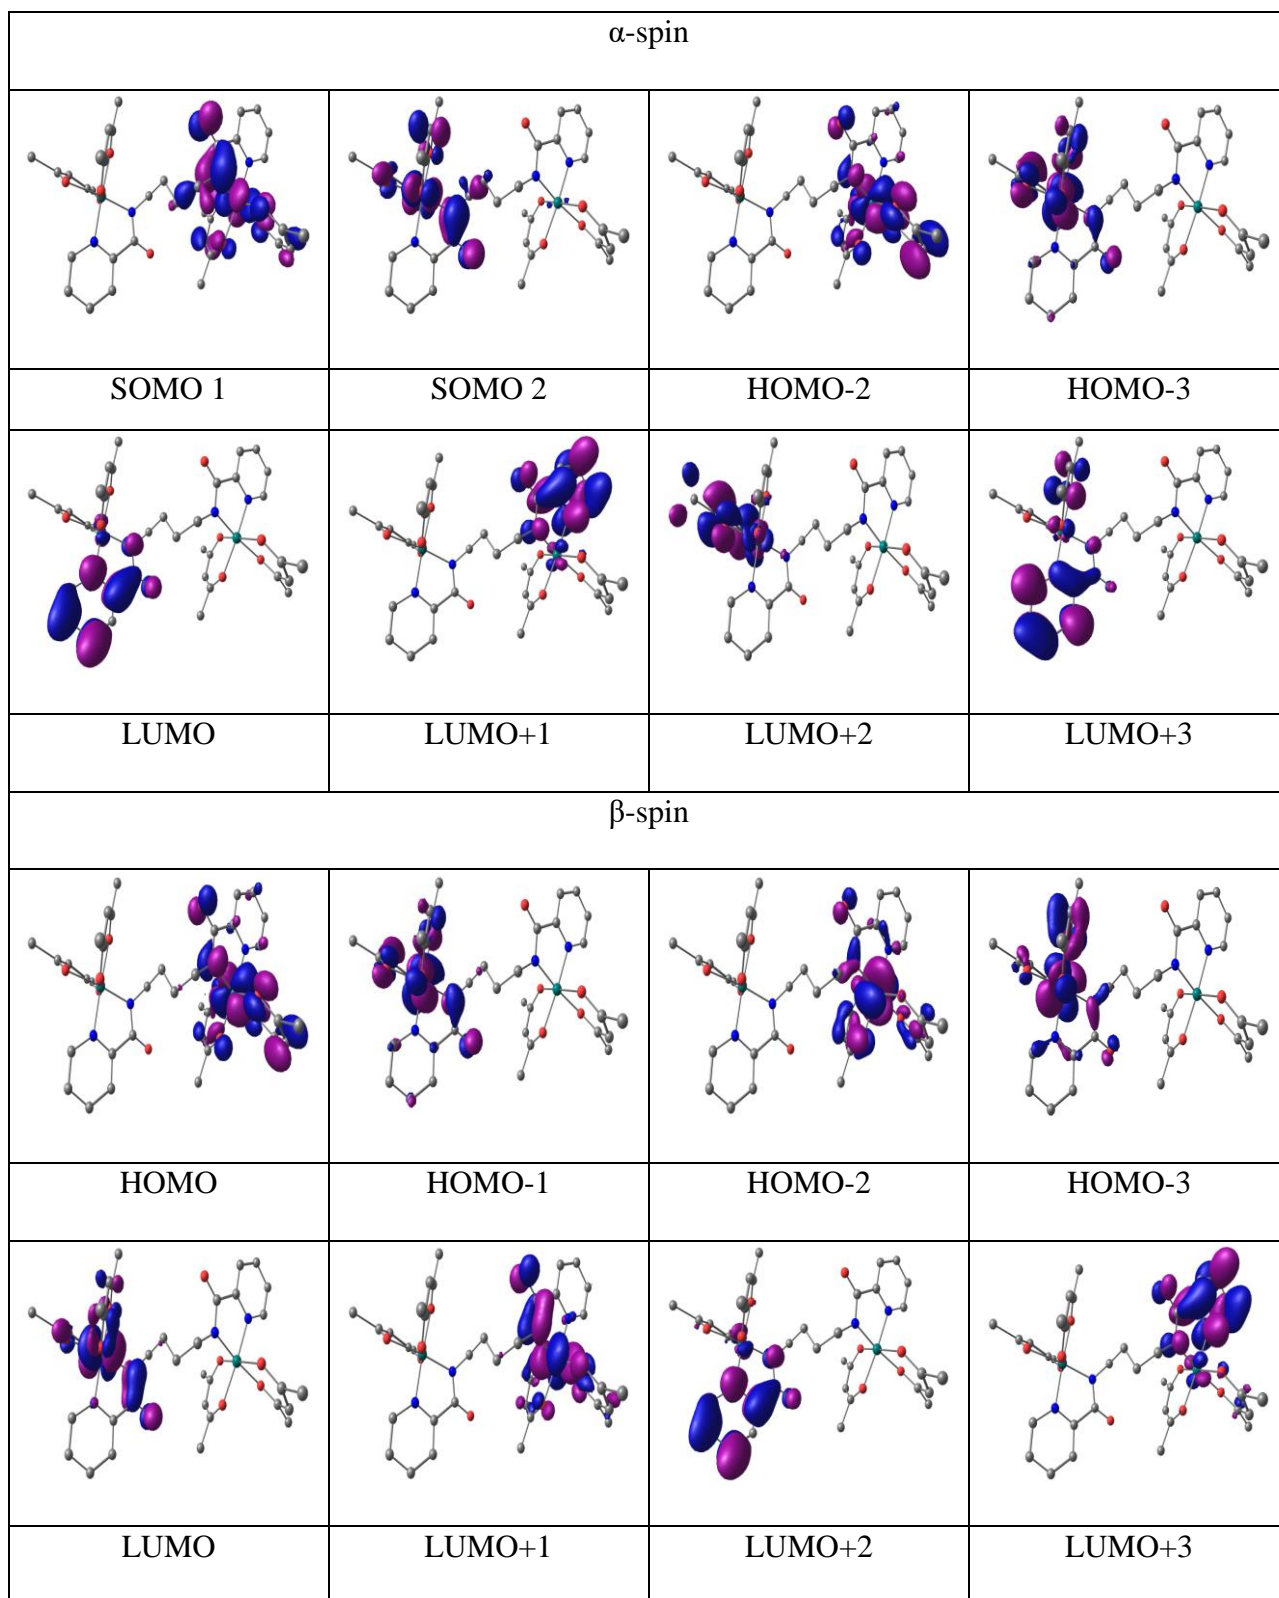

**Table S46** Composition and energies of selected molecular orbitals of **5a**<sup>2-</sup> (*S*=0)

| MO     | Energy (eV) | % Composition |      |    |
|--------|-------------|---------------|------|----|
|        |             | Ru            | acac | L  |
| LUMO+5 | 4.330       | 4             | 10   | 85 |
| LUMO+4 | 4.302       | 6             | 75   | 19 |
| LUMO+3 | 4.199       | 4             | 4    | 92 |
| LUMO+2 | 4.151       | 7             | 82   | 11 |
| LUMO+1 | 3.893       | 6             | 14   | 80 |
| LUMO   | 3.761       | 6             | 15   | 80 |
| HOMO   | 1.781       | 61            | 14   | 25 |
| HOMO-1 | 1.575       | 60            | 14   | 25 |
| HOMO-2 | 1.007       | 70            | 18   | 12 |
| HOMO-3 | 0.835       | 70            | 18   | 12 |
| HOMO-4 | 0.780       | 77            | 14   | 9  |
| HOMO-5 | 0.605       | 77            | 15   | 9  |

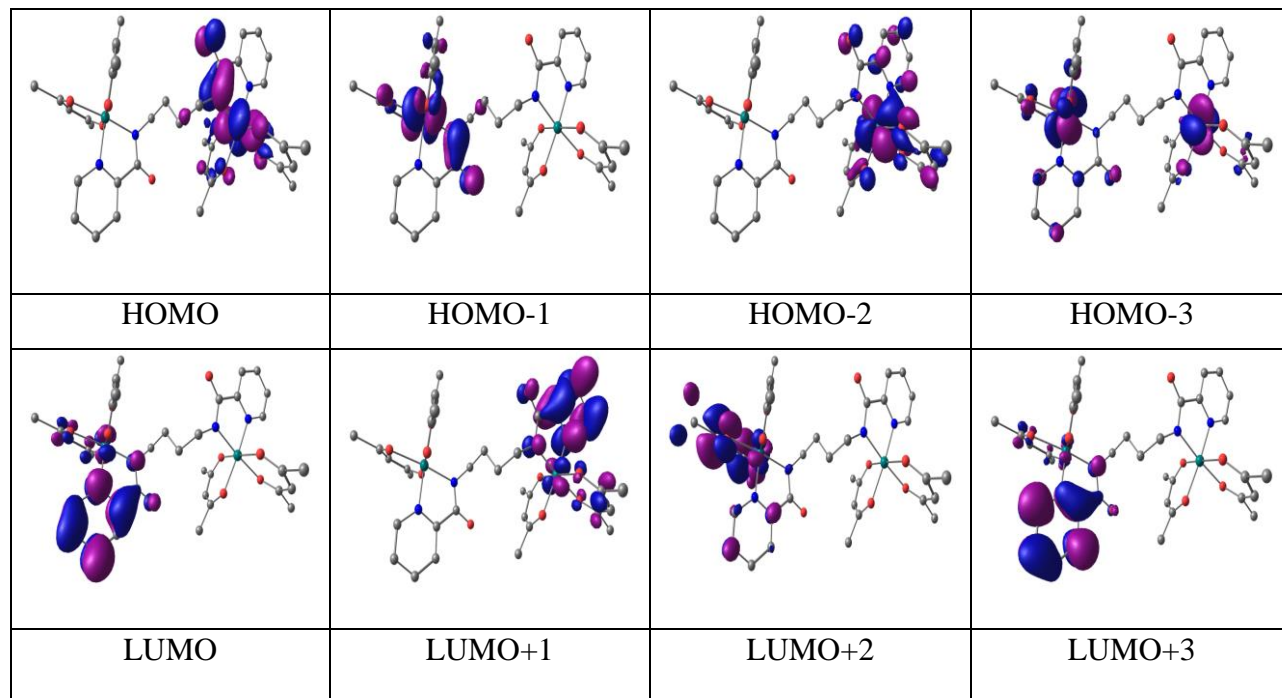

**Table S47** DFT (UB3LYP/LANL2DZ/6-31G\*\*) calculated Mulliken spin density distributions

| Complex          | Ru1    | Ru2    | L      | acac   |
|------------------|--------|--------|--------|--------|
| $2^{2+}(S=1)$    | 0.769  | 0.769  | -0.004 | 0.493  |
| $2^{2-}(S=1)$    | 0.071  | 0.071  | 1.844  | 0.016  |
| $2a^{4+}(S=1)$   | 0.415  | 0.400  | 0.533  | 0.651  |
| $2a^{3+}(S=3/2)$ | 1.137  | 1.134  | -0.681 | 0.920  |
| $2a^{2+}(S=1)$   | 0.007  | 1.218  | 0.351  | 0.426  |
| $2a^{+}(S=1/2)$  | -0.634 | 0.938  | 0.605  | 0.221  |
| $2a(S=1)$        | 0.750  | 0.750  | 0.411  | 0.135  |
| $3^{2+}(S=1)$    | 0.771  | 0.774  | -0.021 | 0.302  |
| $3^{2-}(S=1)$    | 0.078  | 0.081  | 1.924  | 0.016  |
| $3a^{4+}(S=1)$   | 0.275  | 0.343  | 0.834  | 0.473  |
| $3a^{3+}(S=3/2)$ | 1.058  | 1.034  | 1.059  | -0.097 |
| $3a^{2+}(S=1)$   | 0      | 1.213  | 0.226  | 0.416  |
| $3a^{+}(S=1/2)$  | 0.711  | 0.401  | -0.327 | 0.216  |
| $3a(S=1)$        | 0.744  | 0.756  | 0.379  | 0.141  |
| $4^{2+}(S=1)$    | 0.764  | 0.774  | -0.016 | 0.482  |
| $4^{2-}(S=1)$    | 0.079  | 0.092  | 1.813  | 0.015  |
| $4a^{4+}(S=1)$   | 0.304  | 0.321  | 0.251  | 0.302  |
| $4a^{3+}(S=3/2)$ | 0.238  | 1.180  | 0.418  | 1.154  |
| $4a^{2+}(S=1)$   | -0.122 | 1.203  | 0.754  | 0.234  |
| $4a^{+}(S=1/2)$  | 0.477  | 0.403  | 0.136  | 0.025  |
| $4a(S=1)$        | 0.755  | 0.753  | 0.356  | 0.143  |
| $5^{2+}(S=1)$    | 0.765  | 0.766  | -0.020 | 0.493  |
| $5^{2-}(S=1)$    | 0.076  | 0.077  | 1.826  | 0.018  |
| $5a^{4+}(S=1)$   | 0.281  | 0.281  | 0.073  | 0.136  |
| $5a^{3+}(S=3/2)$ | 1.082  | 1.081  | 0.968  | -0.148 |
| $5a^{2+}(S=1)$   | 1.217  | 0      | 0.419  | 0.380  |
| $5a^{+}(S=1/2)$  | 0.923  | -0.398 | 0.350  | 0.137  |
| $5a(S=1)$        | 0.766  | 0.760  | 0.304  | 0.177  |

**Table S48** Simulation data for EPR

| Parameter           | $2^{2+}$           |                  | $3^{2+}$           |                   | $4^{2+}$           |                  | $5^{2+}$           |                   |
|---------------------|--------------------|------------------|--------------------|-------------------|--------------------|------------------|--------------------|-------------------|
|                     | Ru                 | Ru               | Ru                 | Ru                | Ru                 | Ru               | Ru                 | Ru                |
| Sys. weight         | 50%                | 50%              | 25%                | 75%               | 58%                | 42%              | 31%                | 50%               |
| S                   | 1                  |                  | 1                  |                   | 1                  |                  | 1                  |                   |
| $g_x$               | 2.3062             | 2.2551           | 2.3875             | 2.2986            | 2.3121             | 2.4194           | 2.2572             | 2.3183            |
| $g_y$               | 2.2561             | 2.0846           | 2.1522             | 2.2974            | 2.3120             | 2.2899           | 2.2572             | 2.2956            |
| $g_z$               | 1.9154             | 1.7925           | 2.1519             | 1.8990            | 2.1078             | 1.8906           | 2.1581             | 1.9024            |
| lwpp (peak to peak) | 21.8126<br>11.1672 | 4.6423<br>7.1842 | 15.5150<br>11.8349 | 14.2103<br>6.9250 | 10.2630<br>12.2964 | 4.6593<br>0.0700 | 16.7859<br>14.8432 | 17.4424<br>2.2250 |
| A                   | 48.4898            | 111.8380         | 38.4919            | 35.8921           | 28.2692            | 63.2253          | 63.4902            | 84.1727           |
| Parameter           | 2a                 |                  | 3a                 |                   | 4a                 |                  | 5a                 |                   |
|                     | Ru                 | Ru               | Ru                 | Ru                | Ru                 | Ru               | Ru                 | Ru                |
| Sys. weight         | 20%                | 80%              | 70%                | 30%               | 30%                | 70%              | 50%                | 50%               |
| S                   | 1                  |                  | 1                  |                   | 1                  |                  | 1                  |                   |
| $g_x$               | 2.4121             | 2.2400           | 2.4935             | 2.4488            | 2.3493             | 2.2678           | 2.3844             | 2.3104            |
| $g_y$               | 2.2311             | 2.0365           | 2.2466             | 2.2681            | 2.3335             | 2.0907           | 2.2298             | 2.2231            |
| $g_z$               | 2.0574             | 1.7960           | 1.8540             | 2.2680            | 2.1357             | 1.8821           | 2.0603             | 1.8098            |
| lwpp (peak to peak) | 0.0137<br>6.6630   | 6.9747<br>4.4994 | 0.0880<br>11.5717  | 0.0205<br>4.6167  | 4.5832<br>10.8569  | 9.5237<br>5.7337 | 0.2665<br>9.5865   | 2.0679<br>2.4984  |
| A                   | 75.6892            | 0.0949           | 67.1555            | 9.2405            | 21.2639            | 65.0723          | 43.6927            | 61.6109           |

**EPR simulation:**

Spectral simulations were performed using the EasySpin package (version number 5.2.35)<sup>1</sup> based on Matlab R2023a (The MathWorks, Massachusetts, USA). The EPR data was fit using a spin Hamiltonian,  $H$ , containing the electron Zeeman interaction with the applied magnetic field  $B_0$ , and the hyperfine coupling (hfc) interactions with two  $^{99}\text{Ru}/^{101}\text{Ru}$  (natural abundance 12.74 and 17.05 % respectively).

$$H = \beta_e \mathbf{S} \cdot \mathbf{g} \cdot \mathbf{B}_0 + h \mathbf{S} \cdot \mathbf{A}^{Ru_i} \cdot \mathbf{I}^{Ru_i}$$

EasySpin calculates EPR resonance fields using the energies of the states of the spin system obtained by direct diagonalization of the spin Hamiltonian (Eq above). The EPR fitting procedure used a Monte Carlo type iteration to minimize the root-mean-square deviation between measured and simulated spectra. The optimum values of the following parameters were obtained from the simulation: the principal components of  $g$  ( $g_x, g_y, g_z$ ), the principal components of the hfc tensors  $A^{Ru}$  ( $A_x^{Ru}, A_y^{Ru}, A_z^{Ru}$ ), and the peak-to-peak line widths ( $\Delta B_x, \Delta B_y$  and  $\Delta B_z$ )

A. Optimised cartesian coordinates using M06(SMD)/TZVP/SDD//B3LYP/6-31G\*\*/LANL2DZ

level of theory for the free energy calculations

-----  
2 (S=0)  
-----

Zero-point correction= 0.714681 (Hartree/Particle)  
Thermal correction to Energy= 0.765213  
Thermal correction to Enthalpy= 0.766157  
Thermal correction to Gibbs Free Energy= 0.626954  
Sum of electronic and zero-point Energies= -2330.280640  
Sum of electronic and thermal Energies= -2330.230108  
Sum of electronic and thermal Enthalpies= -2330.229164  
Sum of electronic and thermal Free Energies= -2330.368368  
-----

Cartesian Coordinates  
-----

|    |              |              |              |
|----|--------------|--------------|--------------|
| Ru | -1.209350000 | 3.758345000  | 14.375988000 |
| O  | -0.707345000 | 2.166261000  | 15.631081000 |
| O  | -0.883080000 | 2.609036000  | 12.682139000 |
| O  | -1.592720000 | 4.859999000  | 16.083002000 |
| O  | -3.151220000 | 2.981284000  | 14.360130000 |
| N  | -1.573988000 | 5.431214000  | 13.263335000 |
| N  | 0.616356000  | 4.577487000  | 14.279236000 |
| C  | -0.497709000 | 6.253565000  | 13.122709000 |
| C  | 0.709053000  | 5.731728000  | 13.704366000 |
| H  | 1.653613000  | 6.267266000  | 13.627441000 |
| C  | 1.794239000  | 3.961849000  | 14.862865000 |
| H  | 2.702900000  | 4.489138000  | 14.555502000 |
| H  | 1.860442000  | 2.938610000  | 14.483486000 |
| C  | -0.531432000 | 1.393569000  | 12.723155000 |
| C  | -2.892929000 | 6.997506000  | 12.050066000 |
| H  | -3.859683000 | 7.257295000  | 11.638938000 |
| C  | -1.800260000 | 7.844434000  | 11.909021000 |
| H  | -1.896543000 | 8.784761000  | 11.380986000 |
| C  | -0.356931000 | 1.028480000  | 15.209465000 |
| C  | -0.589120000 | 7.464195000  | 12.448707000 |
| H  | 0.291411000  | 8.088994000  | 12.360322000 |
| C  | -2.742028000 | 5.806686000  | 12.729635000 |
| H  | -3.567450000 | 5.115845000  | 12.863247000 |
| C  | -4.032733000 | 3.296965000  | 15.207445000 |
| C  | -2.718822000 | 4.878045000  | 16.663753000 |
| C  | -3.871108000 | 4.176837000  | 16.288865000 |
| H  | -4.741400000 | 4.324752000  | 16.916557000 |
| C  | -0.271126000 | 0.627866000  | 13.867564000 |
| H  | 0.031081000  | -0.398225000 | 13.694763000 |



|    |              |              |              |
|----|--------------|--------------|--------------|
| C  | -0.381232000 | 0.742651000  | 11.379342000 |
| H  | -1.329279000 | 0.801115000  | 10.839550000 |
| H  | -0.075448000 | -0.300308000 | 11.447707000 |
| H  | 0.356141000  | 1.292352000  | 10.789612000 |
| C  | 0.024467000  | 0.046275000  | 16.277393000 |
| H  | 0.955507000  | 0.379298000  | 16.751455000 |
| H  | 0.175339000  | -0.961470000 | 15.891525000 |
| H  | -0.741978000 | 0.028446000  | 17.054451000 |
| C  | -5.376688000 | 2.664234000  | 14.995155000 |
| H  | -5.796922000 | 3.023813000  | 14.051832000 |
| H  | -6.079436000 | 2.884131000  | 15.797542000 |
| H  | -5.262252000 | 1.582325000  | 14.901526000 |
| C  | -2.776360000 | 5.756812000  | 17.878401000 |
| H  | -2.011560000 | 5.441119000  | 18.591872000 |
| H  | -3.749183000 | 5.736621000  | 18.367221000 |
| H  | -2.542839000 | 6.785696000  | 17.594100000 |
| N  | 5.063991000  | 5.430874000  | 17.995626000 |
| N  | 2.873649000  | 4.577136000  | 16.979698000 |
| C  | 3.987651000  | 6.253115000  | 18.136440000 |
| C  | 2.780914000  | 5.731304000  | 17.554709000 |
| H  | 1.836339000  | 6.266809000  | 17.631685000 |
| C  | 1.695798000  | 3.961601000  | 16.395888000 |
| H  | 0.787095000  | 4.488717000  | 16.703419000 |
| H  | 1.629673000  | 2.938240000  | 16.774941000 |
| C  | 6.382811000  | 6.996975000  | 19.209274000 |
| H  | 7.349543000  | 7.256730000  | 19.620475000 |
| C  | 5.290081000  | 7.843791000  | 19.350510000 |
| H  | 5.386289000  | 8.783995000  | 19.878778000 |
| C  | 4.078974000  | 7.463595000  | 18.810722000 |
| H  | 3.198397000  | 8.088310000  | 18.899248000 |
| C  | 6.232001000  | 5.806307000  | 18.529419000 |
| H  | 7.057474000  | 5.115559000  | 18.395644000 |
| Ru | 4.699427000  | 3.758154000  | 16.882728000 |
| O  | 4.197472000  | 2.166156000  | 15.627487000 |
| O  | 4.373602000  | 2.608549000  | 18.576464000 |
| O  | 5.082444000  | 4.860124000  | 15.175844000 |
| O  | 6.641413000  | 2.981359000  | 16.898269000 |
| C  | 4.022094000  | 1.393049000  | 18.535337000 |
| C  | 3.847242000  | 1.028280000  | 16.049003000 |
| C  | 7.522810000  | 3.297387000  | 16.050961000 |
| C  | 6.208515000  | 4.878508000  | 14.595037000 |
| C  | 7.360960000  | 4.177467000  | 14.969744000 |
| H  | 8.231207000  | 4.325714000  | 14.342068000 |
| C  | 3.761616000  | 0.627498000  | 17.390862000 |
| H  | 3.459495000  | -0.398633000 | 17.563576000 |
| C  | 3.872130000  | 0.741935000  | 19.879082000 |
| H  | 4.820202000  | 0.800560000  | 20.418811000 |
| H  | 3.566577000  | -0.301084000 | 19.810612000 |
| H  | 3.134669000  | 1.291392000  | 20.468931000 |
| C  | 3.465829000  | 0.046166000  | 14.980990000 |

|   |             |              |              |
|---|-------------|--------------|--------------|
| H | 2.535088000 | 0.379525000  | 14.506588000 |
| H | 3.314473000 | -0.961512000 | 15.366842000 |
| H | 4.232546000 | 0.028005000  | 14.204204000 |
| C | 8.866931000 | 2.664951000  | 16.263091000 |
| H | 9.287152000 | 3.024537000  | 17.206419000 |
| H | 9.569569000 | 2.885099000  | 15.460676000 |
| H | 8.752756000 | 1.583007000  | 16.356621000 |
| C | 6.265830000 | 5.757549000  | 13.380580000 |
| H | 5.501150000 | 5.441773000  | 12.667016000 |
| H | 7.238674000 | 5.737748000  | 12.891786000 |
| H | 6.031989000 | 6.786305000  | 13.665084000 |

-----  
**2a (S=1)**  
 -----

|                                              |                             |
|----------------------------------------------|-----------------------------|
| Zero-point correction=                       | 0.704482 (Hartree/Particle) |
| Thermal correction to Energy=                | 0.755487                    |
| Thermal correction to Enthalpy=              | 0.756431                    |
| Thermal correction to Gibbs Free Energy=     | 0.618457                    |
| Sum of electronic and zero-point Energies=   | -2479.582031                |
| Sum of electronic and thermal Energies=      | -2479.531026                |
| Sum of electronic and thermal Enthalpies=    | -2479.530081                |
| Sum of electronic and thermal Free Energies= | -2479.668056                |

-----  
 Cartesian Coordinates  
 -----

|    |              |              |              |
|----|--------------|--------------|--------------|
| Ru | 7.417388000  | 6.352415000  | 9.978916000  |
| Ru | 13.353591000 | 6.788317000  | 9.439259000  |
| O  | 12.431198000 | 7.988614000  | 8.067975000  |
| O  | 8.371746000  | 5.288670000  | 11.438323000 |
| O  | 6.418504000  | 7.416874000  | 8.566104000  |
| O  | 14.319547000 | 5.646482000  | 10.813936000 |
| N  | 8.523702000  | 5.422804000  | 8.584797000  |
| O  | 14.578179000 | 8.390375000  | 9.945528000  |
| O  | 8.725817000  | 7.894967000  | 10.371058000 |
| O  | 6.209079000  | 7.193913000  | 11.446209000 |
| O  | 12.033045000 | 7.531695000  | 10.834021000 |
| N  | 14.618060000 | 5.949334000  | 8.054005000  |
| O  | 12.278537000 | 3.362723000  | 7.482650000  |
| N  | 6.158384000  | 4.802585000  | 9.484816000  |
| N  | 12.243567000 | 5.225094000  | 8.841321000  |
| O  | 8.491492000  | 3.674654000  | 7.082006000  |
| C  | 10.864094000 | 5.009728000  | 9.224811000  |
| H  | 10.714309000 | 5.365277000  | 10.248332000 |
| H  | 10.634933000 | 3.938764000  | 9.201383000  |
| C  | 4.954317000  | 4.575160000  | 10.009830000 |
| H  | 4.656879000  | 5.227898000  | 10.822769000 |
| C  | 7.975324000  | 4.363258000  | 7.960327000  |
| C  | 9.680668000  | 10.018962000 | 10.256891000 |
| H  | 9.408233000  | 10.369949000 | 11.256508000 |

|   |              |              |              |
|---|--------------|--------------|--------------|
| H | 9.748143000  | 10.880660000 | 9.592949000  |
| H | 10.655381000 | 9.529021000  | 10.339974000 |
| C | 9.904873000  | 5.742043000  | 8.288673000  |
| H | 10.059158000 | 6.820287000  | 8.386058000  |
| H | 10.135131000 | 5.461053000  | 7.255235000  |
| C | 6.717699000  | 8.620887000  | 8.263828000  |
| C | 6.602059000  | 4.046569000  | 8.467648000  |
| C | 8.666408000  | 9.018598000  | 9.798518000  |
| C | 6.511980000  | 7.242961000  | 12.677857000 |
| C | 14.284103000 | 9.605819000  | 9.729241000  |
| C | 8.388156000  | 5.606117000  | 12.667840000 |
| C | 12.089604000 | 7.256331000  | 12.064773000 |
| C | 14.171219000 | 4.792936000  | 7.538127000  |
| C | 5.838517000  | 3.020815000  | 7.947925000  |
| H | 6.240083000  | 2.436287000  | 7.130303000  |
| C | 14.019093000 | 5.649146000  | 12.055173000 |
| C | 15.191882000 | 10.604678000 | 10.373598000 |
| H | 15.252003000 | 10.404678000 | 11.445462000 |
| H | 14.864801000 | 11.630769000 | 10.214348000 |
| H | 16.200392000 | 10.487730000 | 9.969406000  |
| C | 7.746790000  | 9.389421000  | 8.801954000  |
| H | 7.846796000  | 10.394496000 | 8.411144000  |
| C | 12.794223000 | 4.374266000  | 7.955026000  |
| C | 12.410124000 | 9.257373000  | 8.127648000  |
| C | 7.564227000  | 6.550778000  | 13.284607000 |
| H | 7.695559000  | 6.689922000  | 14.350098000 |
| C | 13.231475000 | 10.056441000 | 8.926575000  |
| H | 13.102515000 | 11.127878000 | 8.840602000  |
| C | 4.141571000  | 3.562942000  | 9.537611000  |
| H | 3.171209000  | 3.402455000  | 9.988389000  |
| C | 14.936972000 | 4.056278000  | 6.657091000  |
| H | 14.532611000 | 3.131331000  | 6.265786000  |
| C | 5.838932000  | 9.216441000  | 7.209755000  |
| H | 5.907244000  | 8.615678000  | 6.300028000  |
| H | 6.101372000  | 10.247110000 | 6.978074000  |
| H | 4.798959000  | 9.176068000  | 7.541298000  |
| C | 15.826857000 | 6.404974000  | 7.724516000  |
| H | 16.126298000 | 7.339160000  | 8.185783000  |
| C | 13.002240000 | 6.375432000  | 12.670623000 |
| H | 12.901421000 | 6.244946000  | 13.740933000 |
| C | 16.641500000 | 5.717677000  | 6.846215000  |
| H | 17.615591000 | 6.116592000  | 6.596261000  |
| C | 16.190917000 | 4.524222000  | 6.306377000  |
| H | 16.812634000 | 3.964663000  | 5.618453000  |
| C | 11.072566000 | 7.951262000  | 12.913021000 |
| H | 11.314293000 | 9.017025000  | 12.957796000 |
| H | 11.035861000 | 7.563473000  | 13.930514000 |
| H | 10.092860000 | 7.863344000  | 12.432510000 |
| C | 9.376813000  | 4.841060000  | 13.489319000 |
| H | 9.143699000  | 3.774954000  | 13.440813000 |

|   |              |              |              |
|---|--------------|--------------|--------------|
| H | 9.389575000  | 5.156592000  | 14.531500000 |
| H | 10.376177000 | 4.968920000  | 13.060279000 |
| C | 5.618455000  | 8.098737000  | 13.518287000 |
| H | 5.620612000  | 9.118340000  | 13.126148000 |
| H | 5.917495000  | 8.115267000  | 14.564846000 |
| H | 4.592335000  | 7.731018000  | 13.445516000 |
| C | 4.588708000  | 2.776231000  | 8.488925000  |
| H | 3.967808000  | 1.979302000  | 8.098694000  |
| C | 14.879737000 | 4.753496000  | 12.888904000 |
| H | 14.796252000 | 3.728073000  | 12.521727000 |
| H | 14.612177000 | 4.778189000  | 13.943605000 |
| H | 15.925284000 | 5.048814000  | 12.775886000 |
| C | 11.422004000 | 9.902966000  | 7.208808000  |
| H | 11.675373000 | 9.665254000  | 6.173064000  |
| H | 11.386405000 | 10.984926000 | 7.327967000  |
| H | 10.427660000 | 9.485301000  | 7.398601000  |

---

**3 (S=0)**

---

|                                              |                             |
|----------------------------------------------|-----------------------------|
| Zero-point correction=                       | 0.746042 (Hartree/Particle) |
| Thermal correction to Energy=                | 0.797135                    |
| Thermal correction to Enthalpy=              | 0.798080                    |
| Thermal correction to Gibbs Free Energy=     | 0.659921                    |
| Sum of electronic and zero-point Energies=   | -2369.550703                |
| Sum of electronic and thermal Energies=      | -2369.499609                |
| Sum of electronic and thermal Enthalpies=    | -2369.498665                |
| Sum of electronic and thermal Free Energies= | -2369.636824                |

---

Cartesian Coordinates

---

|    |              |              |              |
|----|--------------|--------------|--------------|
| Ru | 9.970007000  | 15.754552000 | 8.704409000  |
| Ru | 8.483099000  | 9.950258000  | 10.695954000 |
| O  | 8.975295000  | 8.588105000  | 12.175290000 |
| O  | 8.862815000  | 17.506791000 | 8.944320000  |
| O  | 8.322002000  | 14.849402000 | 9.597399000  |
| O  | 10.800007000 | 16.190802000 | 10.551650000 |
| O  | 9.038861000  | 15.325442000 | 6.908566000  |
| O  | 6.484479000  | 9.564609000  | 11.172661000 |
| O  | 8.388432000  | 11.504829000 | 12.088137000 |
| O  | 7.927231000  | 11.284027000 | 9.223220000  |
| N  | 11.551656000 | 16.634475000 | 7.769211000  |
| N  | 8.695735000  | 8.489559000  | 9.289084000  |
| N  | 10.410655000 | 10.194691000 | 10.165534000 |
| N  | 11.207751000 | 14.168916000 | 8.416821000  |
| C  | 12.324462000 | 14.429288000 | 7.820246000  |
| C  | 10.854600000 | 9.399185000  | 9.247377000  |
| C  | 9.933791000  | 8.426388000  | 8.728439000  |
| C  | 11.671116000 | 17.932723000 | 7.464503000  |

|   |              |              |              |
|---|--------------|--------------|--------------|
| H | 10.835396000 | 18.562427000 | 7.750304000  |
| C | 8.064006000  | 14.930292000 | 10.829221000 |
| C | 12.569903000 | 15.794160000 | 7.448244000  |
| C | 13.720201000 | 16.247265000 | 6.815132000  |
| H | 14.508031000 | 15.541993000 | 6.578987000  |
| C | 9.121809000  | 8.894192000  | 13.395493000 |
| C | 12.786817000 | 18.440589000 | 6.833000000  |
| H | 12.834192000 | 19.497378000 | 6.604783000  |
| C | 5.507341000  | 10.112710000 | 10.585073000 |
| C | 10.957657000 | 16.398619000 | 12.869276000 |
| H | 11.779679000 | 15.688719000 | 13.002568000 |
| H | 10.348035000 | 16.392855000 | 13.772374000 |
| H | 11.404228000 | 17.386149000 | 12.737430000 |
| C | 13.831747000 | 17.585790000 | 6.501557000  |
| H | 14.717714000 | 17.964173000 | 6.007408000  |
| C | 10.246197000 | 7.486874000  | 7.754581000  |
| H | 11.245017000 | 7.470909000  | 7.335102000  |
| C | 8.016504000  | 6.660534000  | 7.925937000  |
| H | 7.229405000  | 5.976902000  | 7.635756000  |
| C | 6.729236000  | 11.580061000 | 8.945876000  |
| C | 9.277885000  | 6.593681000  | 7.345724000  |
| H | 9.497448000  | 5.851287000  | 6.588926000  |
| C | 7.764954000  | 7.615955000  | 8.888567000  |
| H | 6.797692000  | 7.702388000  | 9.371709000  |
| C | 7.979048000  | 17.885597000 | 8.123859000  |
| C | 8.661088000  | 11.365192000 | 13.313025000 |
| C | 10.942029000 | 12.788905000 | 8.792355000  |
| H | 11.718675000 | 12.144963000 | 8.356777000  |
| H | 9.980186000  | 12.490770000 | 8.361873000  |
| C | 10.180271000 | 16.014530000 | 11.644017000 |
| C | 4.154391000  | 9.672963000  | 11.063922000 |
| H | 4.040417000  | 8.600262000  | 10.885832000 |
| H | 3.339101000  | 10.200274000 | 10.570420000 |
| H | 4.079738000  | 9.826100000  | 12.142886000 |
| C | 9.002659000  | 10.168346000 | 13.961400000 |
| H | 9.185516000  | 10.237260000 | 15.026889000 |
| C | 11.301172000 | 11.204999000 | 10.720735000 |
| H | 12.331159000 | 10.995641000 | 10.405584000 |
| H | 11.258341000 | 11.120244000 | 11.810630000 |
| C | 8.088013000  | 16.015917000 | 6.439851000  |
| C | 5.576951000  | 11.053409000 | 9.548740000  |
| H | 4.630863000  | 11.421845000 | 9.170459000  |
| C | 10.907885000 | 12.613074000 | 10.304556000 |
| H | 9.918094000  | 12.852772000 | 10.698357000 |
| H | 11.621691000 | 13.304663000 | 10.765610000 |
| C | 9.463317000  | 7.739622000  | 14.291188000 |
| H | 8.669451000  | 6.990966000  | 14.236969000 |
| H | 9.598334000  | 8.037428000  | 15.329986000 |
| H | 10.378499000 | 7.260813000  | 13.935129000 |
| C | 7.580535000  | 17.215108000 | 6.958913000  |

|   |              |              |              |
|---|--------------|--------------|--------------|
| H | 6.781216000  | 17.676803000 | 6.391856000  |
| C | 7.451771000  | 15.447551000 | 5.205416000  |
| H | 8.223314000  | 15.114734000 | 4.508815000  |
| H | 6.791188000  | 16.155735000 | 4.706960000  |
| H | 6.866259000  | 14.565880000 | 5.484494000  |
| C | 8.898149000  | 15.486088000 | 11.812993000 |
| H | 8.521142000  | 15.456645000 | 12.828282000 |
| C | 7.325469000  | 19.195370000 | 8.454111000  |
| H | 6.958055000  | 19.174809000 | 9.482280000  |
| H | 6.503705000  | 19.438261000 | 7.781890000  |
| H | 8.072427000  | 19.992112000 | 8.397022000  |
| C | 6.579812000  | 12.609622000 | 7.866630000  |
| H | 7.026171000  | 13.548125000 | 8.219093000  |
| H | 5.540721000  | 12.778860000 | 7.584420000  |
| H | 7.148001000  | 12.297706000 | 6.985837000  |
| C | 8.627742000  | 12.628674000 | 14.121090000 |
| H | 9.388440000  | 13.316282000 | 13.735493000 |
| H | 8.804200000  | 12.457919000 | 15.182115000 |
| H | 7.663222000  | 13.125577000 | 13.989705000 |
| C | 6.767185000  | 14.315544000 | 11.260426000 |
| H | 6.020593000  | 14.417747000 | 10.471014000 |
| H | 6.389846000  | 14.751839000 | 12.186184000 |
| H | 6.940379000  | 13.245725000 | 11.430835000 |
| H | 11.881081000 | 9.445365000  | 8.887798000  |
| H | 13.053431000 | 13.652618000 | 7.596635000  |

---

**3a** (S=1)

---

|                                              |                             |
|----------------------------------------------|-----------------------------|
| Zero-point correction=                       | 0.731738 (Hartree/Particle) |
| Thermal correction to Energy=                | 0.784764                    |
| Thermal correction to Enthalpy=              | 0.785708                    |
| Thermal correction to Gibbs Free Energy=     | 0.641729                    |
| Sum of electronic and zero-point Energies=   | -2518.846976                |
| Sum of electronic and thermal Energies=      | -2518.793950                |
| Sum of electronic and thermal Enthalpies=    | -2518.793006                |
| Sum of electronic and thermal Free Energies= | -2518.936985                |

---

Cartesian Coordinates

---

|    |              |              |              |
|----|--------------|--------------|--------------|
| Ru | 10.498997000 | 15.309408000 | 10.674690000 |
| Ru | 8.278622000  | 9.388549000  | 10.824140000 |
| O  | 8.455622000  | 7.671272000  | 11.890376000 |
| O  | 9.405951000  | 17.031047000 | 11.083956000 |
| O  | 8.746504000  | 14.320313000 | 11.113328000 |
| O  | 11.086561000 | 15.294044000 | 12.621038000 |
| O  | 9.864462000  | 15.412088000 | 8.731971000  |
| O  | 6.210936000  | 9.194930000  | 10.972417000 |
| O  | 8.163702000  | 10.534692000 | 12.542475000 |

|   |              |              |              |
|---|--------------|--------------|--------------|
| O | 8.008932000  | 11.051083000 | 9.676282000  |
| O | 13.820942000 | 13.041892000 | 9.978851000  |
| O | 12.000584000 | 8.789871000  | 9.235379000  |
| N | 12.303020000 | 16.221218000 | 10.291024000 |
| N | 8.505897000  | 8.272540000  | 9.118677000  |
| N | 10.269213000 | 9.521966000  | 10.577714000 |
| N | 11.629147000 | 13.714480000 | 10.222897000 |
| C | 12.954496000 | 13.906782000 | 10.115306000 |
| C | 10.809658000 | 8.862314000  | 9.536561000  |
| C | 9.777588000  | 8.165753000  | 8.702330000  |
| C | 12.538505000 | 17.533869000 | 10.304207000 |
| H | 11.677250000 | 18.175170000 | 10.451334000 |
| C | 8.288615000  | 14.224351000 | 12.287091000 |
| C | 13.320396000 | 15.358306000 | 10.131683000 |
| C | 14.618457000 | 15.799966000 | 9.970736000  |
| H | 15.404971000 | 15.066606000 | 9.847178000  |
| C | 8.341729000  | 7.614425000  | 13.161784000 |
| C | 13.812639000 | 18.040543000 | 10.140221000 |
| H | 13.967379000 | 19.111201000 | 10.149972000 |
| C | 5.366544000  | 10.079763000 | 10.639122000 |
| C | 10.905949000 | 15.120523000 | 14.936953000 |
| H | 11.719834000 | 14.397326000 | 15.035349000 |
| H | 10.185248000 | 14.948299000 | 15.734608000 |
| H | 11.345285000 | 16.113718000 | 15.049546000 |
| C | 14.869113000 | 17.160330000 | 9.973483000  |
| H | 15.878285000 | 17.533005000 | 9.848308000  |
| C | 10.103664000 | 7.442005000  | 7.572696000  |
| H | 11.143215000 | 7.382835000  | 7.277301000  |
| C | 7.785673000  | 6.936998000  | 7.301142000  |
| H | 6.968638000  | 6.464626000  | 6.772274000  |
| C | 6.911332000  | 11.662277000 | 9.488321000  |
| C | 9.093571000  | 6.820061000  | 6.860543000  |
| H | 9.322590000  | 6.247054000  | 5.970461000  |
| C | 7.526765000  | 7.672738000  | 8.440950000  |
| H | 6.524599000  | 7.794905000  | 8.836614000  |
| C | 8.414962000  | 17.415193000 | 10.392217000 |
| C | 8.125230000  | 10.050135000 | 13.707761000 |
| C | 11.132847000 | 12.354935000 | 10.136591000 |
| H | 11.829452000 | 11.763037000 | 9.532347000  |
| H | 10.165301000 | 12.359964000 | 9.623266000  |
| C | 10.297096000 | 14.987350000 | 13.577180000 |
| C | 3.945889000  | 9.766766000  | 10.989083000 |
| H | 3.653795000  | 8.828859000  | 10.511017000 |
| H | 3.256872000  | 10.552532000 | 10.683993000 |
| H | 3.863670000  | 9.614795000  | 12.067654000 |
| C | 8.180180000  | 8.685715000  | 14.035713000 |
| H | 8.126700000  | 8.441572000  | 15.088949000 |
| C | 11.152802000 | 10.211760000 | 11.502609000 |
| H | 12.185497000 | 9.968116000  | 11.232262000 |
| H | 10.972804000 | 9.817682000  | 12.510644000 |

|   |              |              |              |
|---|--------------|--------------|--------------|
| C | 8.829219000  | 16.044300000 | 8.352891000  |
| C | 5.657189000  | 11.265166000 | 9.958201000  |
| H | 4.821059000  | 11.907835000 | 9.713725000  |
| C | 10.984625000 | 11.720833000 | 11.516617000 |
| H | 10.018076000 | 11.996824000 | 11.951749000 |
| H | 11.758232000 | 12.132258000 | 12.176300000 |
| C | 8.417931000  | 6.227351000  | 13.715642000 |
| H | 7.646169000  | 5.609635000  | 13.251038000 |
| H | 8.296730000  | 6.200880000  | 14.796942000 |
| H | 9.381668000  | 5.785404000  | 13.452563000 |
| C | 8.082795000  | 16.944470000 | 9.117842000  |
| H | 7.222894000  | 17.394253000 | 8.638217000  |
| C | 8.437527000  | 15.799950000 | 6.929851000  |
| H | 9.197159000  | 16.224264000 | 6.268478000  |
| H | 7.473184000  | 16.241406000 | 6.683143000  |
| H | 8.408315000  | 14.725410000 | 6.738205000  |
| C | 8.981948000  | 14.543831000 | 13.466313000 |
| H | 8.451324000  | 14.374213000 | 14.395142000 |
| C | 7.576443000  | 18.481367000 | 11.022000000 |
| H | 7.152082000  | 18.094320000 | 11.952492000 |
| H | 6.768519000  | 18.819380000 | 10.375322000 |
| H | 8.206302000  | 19.332767000 | 11.288560000 |
| C | 7.033836000  | 12.902490000 | 8.664532000  |
| H | 7.725592000  | 13.582152000 | 9.171325000  |
| H | 6.077734000  | 13.402177000 | 8.509877000  |
| H | 7.469013000  | 12.648173000 | 7.694694000  |
| C | 8.026737000  | 11.060780000 | 14.806909000 |
| H | 8.830253000  | 11.794266000 | 14.689323000 |
| H | 8.081337000  | 10.613928000 | 15.798004000 |
| H | 7.083756000  | 11.606045000 | 14.712710000 |
| C | 6.900522000  | 13.679357000 | 12.388047000 |
| H | 6.275802000  | 14.116778000 | 11.605731000 |
| H | 6.452133000  | 13.869138000 | 13.362780000 |
| H | 6.933146000  | 12.596403000 | 12.220819000 |

---

**4 (S=0)**

---

|                                              |                             |
|----------------------------------------------|-----------------------------|
| Zero-point correction=                       | 0.773963 (Hartree/Particle) |
| Thermal correction to Energy=                | 0.826625                    |
| Thermal correction to Enthalpy=              | 0.827569                    |
| Thermal correction to Gibbs Free Energy=     | 0.685393                    |
| Sum of electronic and zero-point Energies=   | -2408.816139                |
| Sum of electronic and thermal Energies=      | -2408.763477                |
| Sum of electronic and thermal Enthalpies=    | -2408.762533                |
| Sum of electronic and thermal Free Energies= | -2408.904709                |

---

Cartesian Coordinates

---



|    |              |              |              |
|----|--------------|--------------|--------------|
| Ru | 6.379257000  | 22.516573000 | 6.337672000  |
| Ru | 2.083227000  | 23.164908000 | 1.099736000  |
| O  | 6.266178000  | 22.685992000 | 4.271838000  |
| O  | 7.540583000  | 20.782252000 | 6.156567000  |
| O  | 0.888790000  | 24.466395000 | 0.020740000  |
| O  | 4.713537000  | 21.283195000 | 6.225695000  |
| O  | 6.512040000  | 22.273167000 | 8.383223000  |
| O  | 3.221121000  | 21.770975000 | 2.110029000  |
| O  | 0.398681000  | 22.734681000 | 2.262033000  |
| O  | 1.510519000  | 21.545012000 | -0.092274000 |
| N  | 5.362262000  | 24.216800000 | 6.615341000  |
| N  | 7.902282000  | 23.869449000 | 6.509544000  |
| N  | 3.747716000  | 23.672873000 | 0.042780000  |
| N  | 2.703246000  | 24.797213000 | 2.098294000  |
| C  | 6.786284000  | 21.869526000 | 3.456384000  |
| C  | 7.865522000  | 20.256426000 | 5.054019000  |
| C  | 4.114490000  | 20.830658000 | 7.242825000  |
| C  | 0.722526000  | 21.650007000 | -1.073709000 |
| C  | 6.061962000  | 25.258013000 | 6.935057000  |
| H  | 5.601539000  | 26.223294000 | 7.139654000  |
| C  | 5.655841000  | 21.632902000 | 9.062782000  |
| C  | 7.490050000  | 25.103314000 | 6.914066000  |
| C  | 7.539240000  | 20.731373000 | 3.776715000  |
| H  | 7.908760000  | 20.151860000 | 2.939351000  |
| C  | 9.212262000  | 23.646863000 | 6.358712000  |
| H  | 9.487207000  | 22.649278000 | 6.033956000  |
| C  | 3.934630000  | 24.367588000 | 6.373198000  |
| H  | 3.520321000  | 25.147831000 | 7.023260000  |
| H  | 3.440031000  | 23.421969000 | 6.611927000  |
| C  | 4.515566000  | 20.980087000 | 8.577829000  |
| H  | 3.884878000  | 20.507119000 | 9.320804000  |
| C  | 2.733106000  | 20.933802000 | 2.925149000  |
| C  | 0.188813000  | 24.109658000 | -0.972011000 |
| C  | 8.696201000  | 19.011318000 | 5.164668000  |
| H  | 9.641208000  | 19.250129000 | 5.659448000  |
| H  | 8.909362000  | 18.557844000 | 4.197616000  |
| H  | 8.180545000  | 18.284366000 | 5.796176000  |
| C  | 4.376473000  | 24.796118000 | 0.483053000  |
| C  | 4.288384000  | 22.988374000 | -0.972127000 |
| H  | 3.752802000  | 22.094993000 | -1.275104000 |
| C  | 9.747319000  | 25.872475000 | 7.044497000  |
| H  | 10.473621000 | 26.646970000 | 7.256572000  |
| C  | 1.975892000  | 25.386984000 | 3.211630000  |
| H  | 0.913042000  | 25.331180000 | 2.963126000  |
| H  | 2.252915000  | 26.443713000 | 3.313749000  |
| C  | 0.093071000  | 22.822791000 | -1.516797000 |
| H  | -0.554479000 | 22.719293000 | -2.378895000 |
| C  | 3.728027000  | 25.414256000 | 1.606540000  |
| H  | 4.084052000  | 26.360551000 | 2.009642000  |
| C  | 2.856133000  | 20.070754000 | 6.947370000  |

|   |              |              |              |
|---|--------------|--------------|--------------|
| H | 2.217487000  | 20.679195000 | 6.299103000  |
| H | 2.307180000  | 19.794790000 | 7.846550000  |
| H | 3.098675000  | 19.162783000 | 6.388429000  |
| C | 10.159187000 | 24.617683000 | 6.610833000  |
| H | 11.207941000 | 24.387834000 | 6.475136000  |
| C | 8.398294000  | 26.117175000 | 7.193077000  |
| H | 8.030482000  | 27.082875000 | 7.518861000  |
| C | 0.371897000  | 21.795498000 | 3.107846000  |
| C | 5.933579000  | 21.591088000 | 10.536429000 |
| H | 6.888878000  | 21.089507000 | 10.709716000 |
| H | 5.156968000  | 21.072212000 | 11.096372000 |
| H | 6.033516000  | 22.608931000 | 10.919980000 |
| C | 5.546580000  | 25.255016000 | -0.108006000 |
| H | 6.013777000  | 26.156230000 | 0.270895000  |
| C | 1.418881000  | 20.915214000 | 3.415668000  |
| H | 1.189652000  | 20.129460000 | 4.126096000  |
| C | 5.454169000  | 23.389129000 | -1.590899000 |
| H | 5.853164000  | 22.801333000 | -2.407217000 |
| C | -0.611623000 | 25.213178000 | -1.599295000 |
| H | -1.321188000 | 25.606876000 | -0.867313000 |
| H | -1.160586000 | 24.886808000 | -2.481342000 |
| H | 0.052295000  | 26.035856000 | -1.874181000 |
| C | 0.468536000  | 20.374404000 | -1.822517000 |
| H | 1.409852000  | 20.009792000 | -2.242304000 |
| H | -0.254174000 | 20.492805000 | -2.628619000 |
| H | 0.111052000  | 19.609350000 | -1.129692000 |
| C | 6.093793000  | 24.544649000 | -1.156731000 |
| H | 7.008297000  | 24.879255000 | -1.630038000 |
| C | 2.247904000  | 24.661854000 | 4.517896000  |
| H | 1.627941000  | 25.133851000 | 5.288950000  |
| H | 1.921220000  | 23.616971000 | 4.441109000  |
| C | 6.536710000  | 22.186024000 | 2.012909000  |
| H | 5.458283000  | 22.125241000 | 1.827535000  |
| H | 7.056119000  | 21.508583000 | 1.335453000  |
| H | 6.844832000  | 23.213526000 | 1.798979000  |
| C | 3.696432000  | 19.898850000 | 3.420447000  |
| H | 4.387497000  | 19.621330000 | 2.622728000  |
| H | 3.187901000  | 19.009437000 | 3.794055000  |
| H | 4.282123000  | 20.327707000 | 4.242697000  |
| C | -0.916973000 | 21.658753000 | 3.864032000  |
| H | -0.998970000 | 22.490010000 | 4.571378000  |
| H | -0.981170000 | 20.725440000 | 4.422351000  |
| H | -1.762472000 | 21.734418000 | 3.177950000  |
| C | 3.711064000  | 24.717546000 | 4.912310000  |
| H | 4.303963000  | 24.031605000 | 4.295578000  |
| H | 4.112828000  | 25.725019000 | 4.736645000  |

-----  
**4a (S=1)**  
 -----

Zero-point correction=

0.761612 (Hartree/Particle)

|                                              |              |
|----------------------------------------------|--------------|
| Thermal correction to Energy=                | 0.814197     |
| Thermal correction to Enthalpy=              | 0.815141     |
| Thermal correction to Gibbs Free Energy=     | 0.674587     |
| Sum of electronic and zero-point Energies=   | -2558.111170 |
| Sum of electronic and thermal Energies=      | -2558.058585 |
| Sum of electronic and thermal Enthalpies=    | -2558.057641 |
| Sum of electronic and thermal Free Energies= | -2558.198195 |

---

Cartesian Coordinates

---

|    |              |              |              |
|----|--------------|--------------|--------------|
| Ru | 13.441905000 | 6.985929000  | 33.074751000 |
| Ru | 13.929865000 | 14.347554000 | 32.818416000 |
| O  | 14.795069000 | 6.042375000  | 31.894121000 |
| N  | 12.372271000 | 7.621969000  | 31.499630000 |
| O  | 12.103902000 | 7.865798000  | 34.340868000 |
| O  | 14.614158000 | 8.678514000  | 33.228990000 |
| N  | 12.208174000 | 5.366396000  | 32.784441000 |
| O  | 10.591311000 | 7.078111000  | 30.141757000 |
| O  | 14.458024000 | 6.263856000  | 34.742879000 |
| N  | 12.157189000 | 13.783985000 | 32.070361000 |
| O  | 14.872913000 | 13.481660000 | 31.230024000 |
| O  | 10.488709000 | 14.409998000 | 30.609783000 |
| C  | 11.392484000 | 6.826492000  | 31.041873000 |
| C  | 11.343135000 | 5.515666000  | 31.766752000 |
| N  | 13.462117000 | 15.998606000 | 31.686652000 |
| C  | 11.603226000 | 12.463025000 | 32.289142000 |
| H  | 10.519025000 | 12.490676000 | 32.135340000 |
| H  | 11.776707000 | 12.189004000 | 33.336831000 |
| O  | 13.058619000 | 15.282443000 | 34.397484000 |
| O  | 14.279101000 | 12.623633000 | 33.905567000 |
| C  | 15.942362000 | 6.530268000  | 31.617599000 |
| O  | 15.789147000 | 14.988060000 | 33.503839000 |
| C  | 11.540408000 | 14.615755000 | 31.215108000 |
| C  | 11.877527000 | 10.011215000 | 31.833739000 |
| H  | 12.230687000 | 9.862095000  | 32.861975000 |
| H  | 10.789029000 | 9.864308000  | 31.849841000 |
| C  | 12.513867000 | 8.955342000  | 30.949415000 |
| H  | 12.073184000 | 8.984994000  | 29.947449000 |
| H  | 13.584177000 | 9.174634000  | 30.841516000 |
| C  | 11.829707000 | 16.924169000 | 30.231935000 |
| H  | 10.885472000 | 16.797218000 | 29.718175000 |
| C  | 12.241473000 | 4.223234000  | 33.469602000 |
| H  | 12.969168000 | 4.167110000  | 34.271239000 |
| C  | 12.353464000 | 8.178524000  | 35.547611000 |
| C  | 13.433625000 | 7.724752000  | 36.305868000 |
| H  | 13.490928000 | 8.069995000  | 37.330357000 |
| C  | 12.292320000 | 15.899304000 | 31.032362000 |
| C  | 14.376563000 | 6.773796000  | 35.900860000 |
| C  | 11.392088000 | 3.176366000  | 33.168629000 |

|   |              |              |              |
|---|--------------|--------------|--------------|
| H | 11.442185000 | 2.263757000  | 33.747479000 |
| C | 12.968830000 | 14.756199000 | 35.557391000 |
| C | 14.194845000 | 17.107336000 | 31.581389000 |
| H | 15.123564000 | 17.121038000 | 32.140552000 |
| C | 16.101870000 | 13.158136000 | 31.202165000 |
| C | 15.777568000 | 8.767449000  | 32.743321000 |
| C | 11.346797000 | 9.095359000  | 36.166724000 |
| H | 11.592930000 | 9.355211000  | 37.195121000 |
| H | 10.360304000 | 8.627321000  | 36.140460000 |
| H | 11.282171000 | 10.010108000 | 35.568773000 |
| C | 12.587649000 | 18.075674000 | 30.112248000 |
| H | 12.247300000 | 18.894132000 | 29.489964000 |
| C | 16.800156000 | 5.630928000  | 30.785260000 |
| H | 16.905420000 | 4.665469000  | 31.284961000 |
| H | 17.787409000 | 6.049851000  | 30.599185000 |
| H | 16.305950000 | 5.443094000  | 29.829128000 |
| C | 16.434750000 | 7.777188000  | 31.994381000 |
| H | 17.433550000 | 8.019535000  | 31.653999000 |
| C | 10.490314000 | 3.321575000  | 32.127487000 |
| H | 9.813658000  | 2.515398000  | 31.872320000 |
| C | 16.484467000 | 12.304784000 | 30.034577000 |
| H | 15.862965000 | 11.403734000 | 30.028223000 |
| H | 17.535338000 | 12.020153000 | 30.047808000 |
| H | 16.272335000 | 12.842761000 | 29.107738000 |
| C | 16.892171000 | 14.458715000 | 33.171486000 |
| C | 13.786971000 | 18.169686000 | 30.798377000 |
| H | 14.406991000 | 19.053622000 | 30.731399000 |
| C | 10.467004000 | 4.508258000  | 31.416452000 |
| H | 9.785285000  | 4.674756000  | 30.592492000 |
| C | 12.331185000 | 15.645221000 | 36.577401000 |
| H | 12.905947000 | 16.570701000 | 36.657895000 |
| H | 12.265477000 | 15.178177000 | 37.558305000 |
| H | 11.328590000 | 15.920546000 | 36.242491000 |
| C | 12.232468000 | 11.413256000 | 31.390512000 |
| H | 13.323526000 | 11.532302000 | 31.419113000 |
| H | 11.926263000 | 11.589704000 | 30.351125000 |
| C | 13.387910000 | 13.482908000 | 35.935352000 |
| H | 13.213273000 | 13.210464000 | 36.968491000 |
| C | 15.369645000 | 6.259321000  | 36.894075000 |
| H | 16.380310000 | 6.434015000  | 36.518000000 |
| H | 15.250282000 | 5.178502000  | 36.998179000 |
| H | 15.264224000 | 6.725141000  | 37.872421000 |
| C | 17.075044000 | 13.551405000 | 32.121739000 |
| H | 18.081871000 | 13.192359000 | 31.950324000 |
| C | 13.998044000 | 12.505354000 | 35.131735000 |
| C | 18.077939000 | 14.900366000 | 33.969290000 |
| H | 18.200769000 | 15.981061000 | 33.867220000 |
| H | 18.998010000 | 14.407405000 | 33.659996000 |
| H | 17.897829000 | 14.698070000 | 35.027541000 |
| C | 16.483461000 | 10.057981000 | 33.013181000 |

|   |              |              |              |
|---|--------------|--------------|--------------|
| H | 15.796946000 | 10.896183000 | 32.860352000 |
| H | 17.374122000 | 10.185374000 | 32.399320000 |
| H | 16.780345000 | 10.088688000 | 34.065988000 |
| C | 14.361717000 | 11.190120000 | 35.745011000 |
| H | 14.016540000 | 10.372730000 | 35.104255000 |
| H | 13.957221000 | 11.067528000 | 36.749117000 |
| H | 15.451406000 | 11.107157000 | 35.794643000 |

---

**5 (S=0)**

---

|                                              |                             |
|----------------------------------------------|-----------------------------|
| Zero-point correction=                       | 0.772740 (Hartree/Particle) |
| Thermal correction to Energy=                | 0.825176                    |
| Thermal correction to Enthalpy=              | 0.826120                    |
| Thermal correction to Gibbs Free Energy=     | 0.684424                    |
| Sum of electronic and zero-point Energies=   | -2408.817438                |
| Sum of electronic and thermal Energies=      | -2408.765002                |
| Sum of electronic and thermal Enthalpies=    | -2408.764057                |
| Sum of electronic and thermal Free Energies= | -2408.905754                |

---

Cartesian Coordinates

---

|    |              |             |              |
|----|--------------|-------------|--------------|
| Ru | 12.256729000 | 8.563959000 | 8.576256000  |
| O  | 10.988321000 | 7.342742000 | 7.483838000  |
| O  | 13.494155000 | 9.846351000 | 9.625535000  |
| O  | 12.162494000 | 9.865983000 | 6.944709000  |
| O  | 10.642659000 | 9.672256000 | 9.321129000  |
| N  | 13.843686000 | 7.475659000 | 7.901859000  |
| N  | 12.499528000 | 7.217084000 | 10.078642000 |
| C  | 10.268510000 | 6.866109000 | 11.067153000 |
| H  | 9.750729000  | 6.899842000 | 12.031965000 |
| H  | 9.831281000  | 7.649279000 | 10.443047000 |
| C  | 14.234431000 | 6.463839000 | 8.720632000  |
| C  | 11.729263000 | 7.185231000 | 11.313604000 |
| H  | 11.820826000 | 8.173211000 | 11.776789000 |
| H  | 12.165831000 | 6.447161000 | 12.001355000 |
| C  | 15.285107000 | 5.619245000 | 8.388268000  |
| H  | 15.563559000 | 4.825434000 | 9.070919000  |
| C  | 14.491732000 | 7.651319000 | 6.744585000  |
| H  | 14.137565000 | 8.467444000 | 6.124490000  |
| C  | 9.035216000  | 6.606546000 | 6.448046000  |
| H  | 9.433895000  | 6.707029000 | 5.435613000  |
| H  | 7.958471000  | 6.770714000 | 6.422364000  |
| H  | 9.233189000  | 5.579889000 | 6.768331000  |
| C  | 15.949133000 | 5.810549000 | 7.194351000  |
| H  | 16.771346000 | 5.165413000 | 6.911572000  |
| C  | 13.466653000 | 6.374373000 | 9.931097000  |
| H  | 13.705115000 | 5.632010000 | 10.690828000 |
| C  | 9.747038000  | 7.558969000 | 7.363787000  |

|    |              |              |              |
|----|--------------|--------------|--------------|
| C  | 15.542533000 | 6.844681000  | 6.359980000  |
| H  | 16.035605000 | 7.027964000  | 5.414141000  |
| C  | 14.757423000 | 11.745566000 | 10.104273000 |
| H  | 14.200833000 | 11.969808000 | 11.017560000 |
| H  | 15.110421000 | 12.679011000 | 9.668450000  |
| H  | 15.617779000 | 11.138910000 | 10.396124000 |
| C  | 13.884431000 | 10.960845000 | 9.169422000  |
| C  | 9.001380000  | 8.560378000  | 7.998878000  |
| H  | 7.941858000  | 8.581888000  | 7.771467000  |
| C  | 9.454153000  | 9.512711000  | 8.925602000  |
| C  | 12.779883000 | 10.967898000 | 6.904568000  |
| C  | 13.586495000 | 11.509896000 | 7.915163000  |
| H  | 14.029340000 | 12.475473000 | 7.703186000  |
| C  | 8.435312000  | 10.394370000 | 9.585739000  |
| H  | 8.262769000  | 10.025662000 | 10.602985000 |
| H  | 7.480740000  | 10.402747000 | 9.060244000  |
| H  | 8.817551000  | 11.412659000 | 9.672732000  |
| C  | 12.624816000 | 11.735162000 | 5.624364000  |
| H  | 13.082491000 | 11.168429000 | 4.808702000  |
| H  | 13.083619000 | 12.722058000 | 5.664494000  |
| H  | 11.564434000 | 11.839061000 | 5.385112000  |
| N  | 6.010675000  | 5.864079000  | 13.023809000 |
| N  | 7.668511000  | 5.553792000  | 11.085750000 |
| C  | 10.054670000 | 5.512434000  | 10.417455000 |
| H  | 10.656295000 | 5.441892000  | 9.503150000  |
| H  | 10.396599000 | 4.719415000  | 11.090668000 |
| C  | 5.954210000  | 6.805027000  | 12.044222000 |
| C  | 8.608832000  | 5.281288000  | 10.008333000 |
| H  | 8.465153000  | 4.241007000  | 9.702597000  |
| H  | 8.366884000  | 5.927512000  | 9.154829000  |
| C  | 5.070267000  | 7.874033000  | 12.109512000 |
| H  | 5.058397000  | 8.602481000  | 11.307281000 |
| C  | 5.192370000  | 5.980774000  | 14.076069000 |
| H  | 5.284850000  | 5.207951000  | 14.831844000 |
| C  | 4.228051000  | 7.983646000  | 13.196812000 |
| H  | 3.530653000  | 8.808345000  | 13.272200000 |
| C  | 6.883471000  | 6.574406000  | 10.972818000 |
| H  | 6.919134000  | 7.235115000  | 10.106772000 |
| C  | 4.293038000  | 7.019459000  | 14.195888000 |
| H  | 3.651004000  | 7.070071000  | 15.065552000 |
| Ru | 7.407632000  | 4.410198000  | 12.732370000 |
| O  | 8.745502000  | 5.495865000  | 13.879353000 |
| O  | 6.075459000  | 3.261988000  | 11.641712000 |
| O  | 7.000277000  | 3.345430000  | 14.483036000 |
| O  | 8.835559000  | 2.931059000  | 12.352180000 |
| C  | 10.699833000 | 6.019725000  | 15.034301000 |
| H  | 10.166355000 | 6.193962000  | 15.971670000 |
| H  | 11.698701000 | 5.646194000  | 15.255730000 |
| H  | 10.785976000 | 6.988358000  | 14.532770000 |
| C  | 9.908614000  | 5.085023000  | 14.167220000 |

|   |              |             |              |
|---|--------------|-------------|--------------|
| C | 4.513089000  | 1.599054000 | 11.167373000 |
| H | 5.107681000  | 1.221247000 | 10.332525000 |
| H | 3.969837000  | 0.771334000 | 11.620839000 |
| H | 3.794710000  | 2.309727000 | 10.751530000 |
| C | 5.409572000  | 2.307627000 | 12.140058000 |
| C | 10.509188000 | 3.892391000 | 13.748093000 |
| H | 11.514722000 | 3.712339000 | 14.109071000 |
| C | 9.977955000  | 2.918088000 | 12.887923000 |
| C | 6.182600000  | 2.383694000 | 14.536156000 |
| C | 5.428482000  | 1.870632000 | 13.471048000 |
| H | 4.781632000  | 1.033899000 | 13.705295000 |
| C | 10.853099000 | 1.762987000 | 12.498840000 |
| H | 11.211535000 | 1.920646000 | 11.476589000 |
| H | 11.718379000 | 1.652136000 | 13.151174000 |
| H | 10.272801000 | 0.838910000 | 12.498558000 |
| C | 6.013684000  | 1.768613000 | 15.894444000 |
| H | 5.581418000  | 2.509629000 | 16.572546000 |
| H | 5.372650000  | 0.888251000 | 15.883420000 |
| H | 6.991502000  | 1.498260000 | 16.298815000 |

---

**5a (S=1)**

---

|                                              |                             |
|----------------------------------------------|-----------------------------|
| Zero-point correction=                       | 0.759089 (Hartree/Particle) |
| Thermal correction to Energy=                | 0.813813                    |
| Thermal correction to Enthalpy=              | 0.814758                    |
| Thermal correction to Gibbs Free Energy=     | 0.664920                    |
| Sum of electronic and zero-point Energies=   | -2558.113085                |
| Sum of electronic and thermal Energies=      | -2558.058360                |
| Sum of electronic and thermal Enthalpies=    | -2558.057416                |
| Sum of electronic and thermal Free Energies= | -2558.207254                |

---

Cartesian Coordinates

---

|    |              |              |              |
|----|--------------|--------------|--------------|
| Ru | 12.391795000 | 8.830444000  | 8.499801000  |
| O  | 11.101599000 | 7.741857000  | 7.371191000  |
| O  | 13.718293000 | 9.960508000  | 9.569477000  |
| O  | 12.696244000 | 10.070997000 | 6.863248000  |
| O  | 10.927293000 | 10.181468000 | 9.053620000  |
| N  | 13.787218000 | 7.416737000  | 7.978944000  |
| N  | 12.244426000 | 7.570320000  | 10.066538000 |
| C  | 9.931534000  | 7.640852000  | 10.955297000 |
| H  | 9.391326000  | 7.782920000  | 11.899832000 |
| H  | 9.569967000  | 8.417650000  | 10.273284000 |
| C  | 13.834597000 | 6.361002000  | 8.806739000  |
| C  | 11.416753000 | 7.832904000  | 11.229813000 |
| H  | 11.601823000 | 8.863505000  | 11.552354000 |
| H  | 11.720669000 | 7.163580000  | 12.043520000 |
| C  | 14.649685000 | 5.278234000  | 8.542820000  |

|   |              |              |              |
|---|--------------|--------------|--------------|
| H | 14.654249000 | 4.449581000  | 9.239067000  |
| C | 14.526778000 | 7.429793000  | 6.869577000  |
| H | 14.426857000 | 8.305647000  | 6.239121000  |
| C | 9.145565000  | 7.192972000  | 6.234831000  |
| H | 9.729363000  | 6.959728000  | 5.342292000  |
| H | 8.175758000  | 7.592218000  | 5.943061000  |
| H | 8.991800000  | 6.252579000  | 6.772698000  |
| C | 15.428225000 | 5.288141000  | 7.399541000  |
| H | 16.075558000 | 4.451049000  | 7.169006000  |
| C | 12.962626000 | 6.435663000  | 10.021865000 |
| C | 9.912738000  | 8.130266000  | 7.112165000  |
| C | 15.365647000 | 6.380544000  | 6.549991000  |
| H | 15.956246000 | 6.424124000  | 5.644658000  |
| C | 14.851717000 | 11.853753000 | 10.317280000 |
| H | 14.303827000 | 11.845058000 | 11.261880000 |
| H | 15.084598000 | 12.881568000 | 10.044599000 |
| H | 15.784624000 | 11.309973000 | 10.483772000 |
| C | 14.049130000 | 11.150103000 | 9.269231000  |
| C | 9.287330000  | 9.282266000  | 7.582069000  |
| H | 8.272452000  | 9.447430000  | 7.242639000  |
| C | 9.784505000  | 10.206710000 | 8.515340000  |
| C | 13.166488000 | 11.247041000 | 6.940163000  |
| C | 13.766834000 | 11.809244000 | 8.070064000  |
| H | 14.134140000 | 12.822883000 | 7.974488000  |
| C | 8.874988000  | 11.290335000 | 9.001885000  |
| H | 8.513674000  | 11.017951000 | 9.998842000  |
| H | 8.012827000  | 11.434364000 | 8.352825000  |
| H | 9.426884000  | 12.225995000 | 9.100859000  |
| C | 13.084536000 | 12.047904000 | 5.679789000  |
| H | 13.632078000 | 11.532768000 | 4.887077000  |
| H | 13.486979000 | 13.052809000 | 5.795077000  |
| H | 12.042190000 | 12.110888000 | 5.358916000  |
| N | 5.723198000  | 6.115418000  | 13.393582000 |
| N | 7.322595000  | 6.205695000  | 11.344426000 |
| C | 9.614353000  | 6.276145000  | 10.379822000 |
| H | 10.125487000 | 6.159991000  | 9.415592000  |
| H | 10.028825000 | 5.504970000  | 11.034720000 |
| C | 5.588223000  | 7.196122000  | 12.608997000 |
| C | 8.131508000  | 6.033643000  | 10.151801000 |
| H | 7.982254000  | 5.009516000  | 9.789340000  |
| H | 7.765851000  | 6.718975000  | 9.378319000  |
| C | 4.656993000  | 8.175928000  | 12.889977000 |
| H | 4.584113000  | 9.027695000  | 12.225789000 |
| C | 4.958394000  | 5.975845000  | 14.477017000 |
| H | 5.131931000  | 5.087250000  | 15.073387000 |
| C | 3.854182000  | 8.035792000  | 14.007878000 |
| H | 3.117217000  | 8.790873000  | 14.251923000 |
| C | 6.481693000  | 7.253264000  | 11.407989000 |
| C | 4.006024000  | 6.918255000  | 14.812382000 |
| H | 3.398554000  | 6.773568000  | 15.695747000 |



|    |              |             |              |
|----|--------------|-------------|--------------|
| Ru | 7.286811000  | 4.892028000 | 12.870169000 |
| O  | 8.395129000  | 6.091387000 | 14.075743000 |
| O  | 6.143478000  | 3.648445000 | 11.713808000 |
| O  | 7.072212000  | 3.571635000 | 14.456754000 |
| O  | 8.918450000  | 3.736782000 | 12.330607000 |
| C  | 10.246057000 | 6.863848000 | 15.257528000 |
| H  | 9.645685000  | 6.951533000 | 16.165351000 |
| H  | 11.270920000 | 6.609784000 | 15.522520000 |
| H  | 10.238577000 | 7.844098000 | 14.772693000 |
| C  | 9.625843000  | 5.862279000 | 14.335982000 |
| C  | 5.258135000  | 1.664528000 | 10.872740000 |
| H  | 5.836892000  | 1.762684000 | 9.951941000  |
| H  | 5.132023000  | 0.609473000 | 11.109325000 |
| H  | 4.277115000  | 2.106149000 | 10.682421000 |
| C  | 5.936431000  | 2.421866000 | 11.970201000 |
| C  | 10.405943000 | 4.825954000 | 13.837888000 |
| H  | 11.435158000 | 4.795185000 | 14.175506000 |
| C  | 10.051178000 | 3.864437000 | 12.874043000 |
| C  | 6.735550000  | 2.354162000 | 14.331124000 |
| C  | 6.243589000  | 1.763467000 | 13.164430000 |
| H  | 5.984637000  | 0.714023000 | 13.220416000 |
| C  | 11.128791000 | 2.957766000 | 12.370580000 |
| H  | 11.739545000 | 3.517079000 | 11.651729000 |
| H  | 11.789702000 | 2.634292000 | 13.175724000 |
| H  | 10.697164000 | 2.091714000 | 11.870698000 |
| C  | 6.851496000  | 1.532102000 | 15.575035000 |
| H  | 6.181473000  | 1.935785000 | 16.338044000 |
| H  | 6.607212000  | 0.484419000 | 15.408312000 |
| H  | 7.867366000  | 1.609756000 | 15.968510000 |
| O  | 12.981838000 | 5.527560000 | 10.854272000 |
| O  | 6.368165000  | 8.171042000 | 10.595088000 |

---

## References

- 1 S. Stoll, A. Schweiger, *J. Magn. Reson.*, 2006, **178**, 42.
